# Supplementary material for: Ruthenium(0)-catalyzed cross-coupling of aryl methyl ethers with organoboranes by selective C–O cleavage
Source: Royal Society of Chemistry journal article supplement (doi:10.1039/d3qo00042g), 2023-01-01
Supplement: d3qo00042g1.pdf [file d3qo00042g1.pdf]

## Supporting Information

# Ruthenium(0)-Catalyzed Cross-Coupling of Aryl Methyl Ethers with Organoboranes by Selective C–O Cleavage

Jin Zhang,<sup>\*,†</sup> Xin Wang,<sup>†</sup> Jiale Liu,<sup>†</sup> Xiaogang Wang,<sup>†</sup> Xinkan Yang,<sup>†</sup> Qun Zhao,<sup>‡</sup> Yangmin Ma,<sup>†</sup>  
Ran Fang,<sup>\*,†</sup> and Michal Szostak<sup>\*,‡</sup>

<sup>†</sup>*College of Chemistry and Chemical Engineering, Youth Innovation Team of Shaanxi Universities and Key Laboratory of Chemical Additives for China National Light Industry, Shaanxi University of Science and Technology, Xi'an 710021, China*

<sup>‡</sup>*Department of Chemistry, Rutgers University, 73 Warren Street, Newark, NJ 07102, USA*

[zhangjin@sust.edu.cn](mailto:zhangjin@sust.edu.cn); [fangr@lzu.edu.cn](mailto:fangr@lzu.edu.cn); [michal.szostak@rutgers.edu](mailto:michal.szostak@rutgers.edu)

|                                                                        |     |
|------------------------------------------------------------------------|-----|
| <b>Table of Contents</b>                                               | S1  |
| List of Known Compounds and General Methods                            | S2  |
| Experimental Procedures and Characterization Data                      | S3  |
| Ru(0)-Catalyzed C–O Arylation of Aryl Methyl Ethers                    | S5  |
| Ru(0)-Catalyzed C–O Arylation of Aryl Methyl Ethers: Synthetic Utility | S15 |
| Mechanistic Selectivity Studies                                        | S20 |
| References                                                             | S21 |
| <sup>1</sup> H, <sup>13</sup> C and <sup>19</sup> F NMR Spectra        | S22 |
| Computational Details                                                  | S51 |
| Cartesian Coordinates of the Stationary Points                         | S53 |

## List of Known Compounds and General Methods

All starting materials reported in the manuscript have been previously described in literature unless stated otherwise. Imines were prepared by standard methods.<sup>1-5</sup> Organoboranes were prepared by standard methods.<sup>6,7</sup> All experiments involving ruthenium were performed using Schlenk or glovebox techniques under argon or nitrogen atmosphere unless stated otherwise. All solvents were purchased at the highest commercial grade and used as received or after purification by distillation from sodium/benzophenone under nitrogen. All solvents were deoxygenated prior to use. All other chemicals were purchased at the highest commercial grade and used as received. Reaction glassware was oven-dried at 140 °C for at least 24 h or flame-dried prior to use, allowed to cool under vacuum and purged with argon (three cycles). All products were identified using <sup>1</sup>H NMR and GC-MS analysis and comparison with authentic samples. GC and/or GC/MS analysis was used for volatile products. All yields refer to yields determined by <sup>1</sup>H NMR and/or GC or GC/MS using an internal standard (optimization) and isolated yields (preparative runs), unless stated otherwise. <sup>1</sup>H NMR, <sup>13</sup>C NMR and <sup>19</sup>F NMR spectra were recorded in CDCl<sub>3</sub> on Bruker spectrometers at 400 (<sup>1</sup>H NMR), 100 (<sup>13</sup>C NMR) and 376 MHz (<sup>19</sup>F NMR). All shifts are reported in parts per million (ppm) relative to residual CHCl<sub>3</sub> peak (7.27 and 77.2 ppm, <sup>1</sup>H NMR and <sup>13</sup>C NMR, respectively). All coupling constants (*J*) are reported in hertz (Hz). Abbreviations are: s, singlet; d, doublet; t, triplet; q, quartet; brs, broad singlet. GC-MS chromatography was performed using Agilent HP6890 GC System and Agilent 5973A inert XL EI/CI MSD using helium as the carrier gas at a flow rate of 1 mL/min and an initial oven temperature of 50 °C. The injector temperature was 250 °C. The detector temperature was 250 °C. For runs with the initial oven temperature of 50 °C, temperature was increased with a 10 °C/min ramp after 50 °C hold for 3 min to a final temperature of 280 °C, then hold at 280 °C for 30 min (splitless mode of injection, total run time of 53.00 min). High-resolution mass spectra (HRMS) were measured on a Thermo Fisher TSQ 8000 Evo Triple Quadrupole GC-MS/MS instrument. All flash chromatography was performed using silica gel, 60 Å, 300mesh. TLC analysis was carried out on glass plates coated with silica gel 60 F254, 0.2 mm thickness. The plates were visualized using a 254 nm ultraviolet lamp or aqueous potassium permanganate solutions. <sup>1</sup>H NMR, <sup>13</sup>C NMR and HRMS data are reported for all new compounds.

## Experimental Procedures and Characterization Data

**General Procedure. Ru(0)-Catalyzed C–OMe Arylation.** An oven-dried vial equipped with a stir bar was charged with an imine substrate (typically, 0.2 mmol, 1.0 equiv), boronic ester (typically, 2.5 equiv), Ru<sub>3</sub>(CO)<sub>12</sub> (typically, 5 mol%), placed under a positive pressure of argon, and subjected to three evacuation/backfilling cycles under high vacuum. Toluene (typically, 1.0 M) was added with vigorous stirring at room temperature, the reaction mixture was placed in a preheated oil bath at 140 °C, and stirred for an indicated time at 140 °C. After the indicated time, the reaction mixture was cooled down to room temperature, diluted with CH<sub>2</sub>Cl<sub>2</sub> (5 mL), filtered and concentrated. The sample was analyzed by <sup>1</sup>H NMR (CDCl<sub>3</sub>, 400 MHz) and GC-MS to obtain conversion, selectivity, and yield using an internal standard and comparison with authentic samples. Unless stated otherwise, the crude product was subjected to the imine deprotection procedure using 1.0 *N* aqueous HCl in diethyl ether for 3 h at room temperature, and purified by chromatography on silica gel (EtOAc/hexanes) to afford analytically pure aldehyde products. Note that the imine product could typically be obtained directly by careful chromatography on silica gel or by recrystallization from methanol.<sup>1–5</sup> Routinely, GC-MS analysis was used as a complementary method of analysis to confirm the product distribution.

**General Procedure. Imine Deprotection.** To the solution of an imine substrate (typically, 0.2 mmol) in diethyl ether (typically, 10 mL), HCl (aq, 1.0 *N*, 10 mL) was added. The reaction mixture was stirred for 3 h at room temperature. After the indicated time, the reaction mixture was diluted with diethyl ether (10 mL), the aqueous layer was extracted with diethyl ether (3 x 20 mL), organic layers were combined, dried over Na<sub>2</sub>SO<sub>4</sub>, filtered and concentrated. Purification by chromatography using silica gel (EtOAc/hexanes) afforded the title product.

**Ru(0)-Catalyzed C–OMe Arylation. 1.0 Mmol Scale.** An oven-dried vial equipped with a stir bar was charged with *N*-((2-methoxynaphthalen-1-yl)methylene)aniline (261 mg, 1.0 mmol, 1.0 equiv), phenylboronic ester (475 mg, 2.5 mmol, 2.5 equiv), Ru<sub>3</sub>(CO)<sub>12</sub> (32 mg, 5 mol%), placed under a positive pressure of argon, and subjected to three evacuation/backfilling cycles under high vacuum. Toluene (1.0 M) was added with vigorous stirring at room temperature, the reaction mixture was placed in a preheated oil bath at 140 °C, and stirred at 140 °C for 10 h. After the indicated time, the reaction mixture was cooled down to room temperature, the reaction

mixture was analyzed by  $^1\text{H}$  NMR ( $\text{CDCl}_3$ , 400 MHz) and GC-MS to obtain selectivity, conversion and yield using internal standard. Acidic work-up and purification by chromatography (EtOAc/hexanes) afforded the title product (198 mg). Yellow solid. Yield 85%. Characterization data are included in the section below.

**Ru(0)-Catalyzed C–O Arylation of Aryl Methyl Ethers****(1,1':3',1''-Terphenyl)-2'-carbaldehyde (3a)**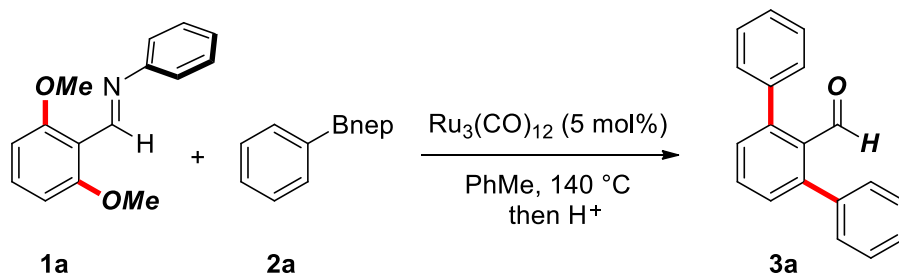

According to the general procedure, *N*-(2,6-dimethoxybenzylidene)aniline (**1a**, 48.3 mg, 0.20 mmol) was reacted with Ph–Bnep (**2a**, 95.0 mg, 0.50 mmol), and  $\text{Ru}_3(\text{CO})_{12}$  (6.4 mg, 5 mol%) in toluene (1.0 M) at 140 °C for 10 h. Acidic work-up and purification by chromatography afforded **3a** in 73% yield (37.7 mg). White solid. **Mp** = 122–123 °C.  **$^1\text{H NMR}$  (400 MHz,  $\text{CDCl}_3$ )**  $\delta$  9.96 (s, 1H), 7.58 (t,  $J = 7.6$  Hz, 1H), 7.44 – 7.38 (m, 8H), 7.37 – 7.34 (m, 4H).  **$^{13}\text{C NMR}$  (100 MHz,  $\text{CDCl}_3$ )**  $\delta$  193.7, 144.5, 139.8, 133.4, 131.6, 130.5, 129.7, 128.3, 127.8. **MS** = 258.1 (EI). **HRMS** calcd for  $\text{C}_{19}\text{H}_{15}\text{O}$  ( $\text{M}^+ + \text{H}$ ) 259.1117 found 259.1119.

**4,4''-Dimethoxy-[1,1':3',1''-terphenyl]-2'-carbaldehyde (3b)**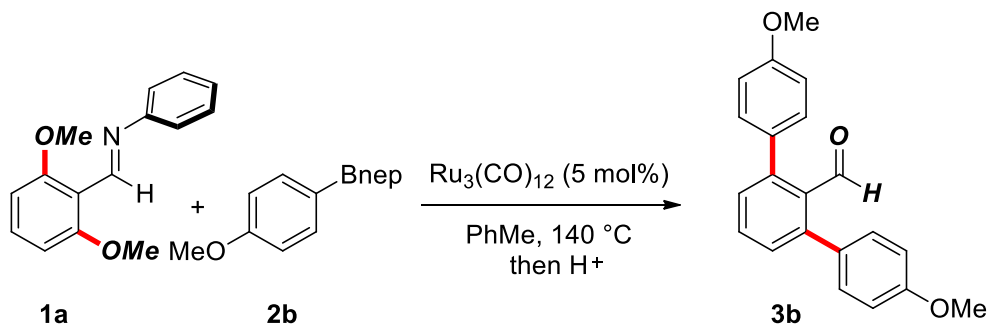

According to the general procedure, *N*-(2,6-dimethoxybenzylidene)aniline (**1a**, 48.3 mg, 0.20 mmol) was reacted with 4-MeO- $\text{C}_4\text{H}_4$ –Bnep (**2b**, 110.0 mg, 0.50 mmol), and  $\text{Ru}_3(\text{CO})_{12}$  (6.4 mg, 5 mol%) in toluene (1.0 M) at 140 °C for 10 h. Acidic work-up and purification by chromatography afforded **3b** in 81% yield (51.5 mg). White solid. **Mp** = 121–122 °C.  **$^1\text{H NMR}$  (400 MHz,  $\text{CDCl}_3$ )**  $\delta$  9.94 (s, 1H), 7.54 (t,  $J = 7.6$  Hz, 1H), 7.34 (d,  $J = 7.6$  Hz, 2H), 7.27 (d,  $J = 8.4$  Hz, 4H), 6.98 (d,  $J = 8.8$  Hz, 4H), 3.85 (s, 6H).  **$^{13}\text{C NMR}$  (100 MHz,  $\text{CDCl}_3$ )**  $\delta$  194.0, 159.5,

144.1, 133.5, 132.1, 131.5, 131.0, 130.2, 113.8, 55.5. **MS** = 318.1 (EI). **HRMS** calcd for C<sub>21</sub>H<sub>19</sub>O<sub>3</sub> (M<sup>+</sup> + H) 319.1329 found 319.1327.

#### 4,4''-Dimethyl-[1,1':3',1''-terphenyl]-2'-carbaldehyde (**3c**)

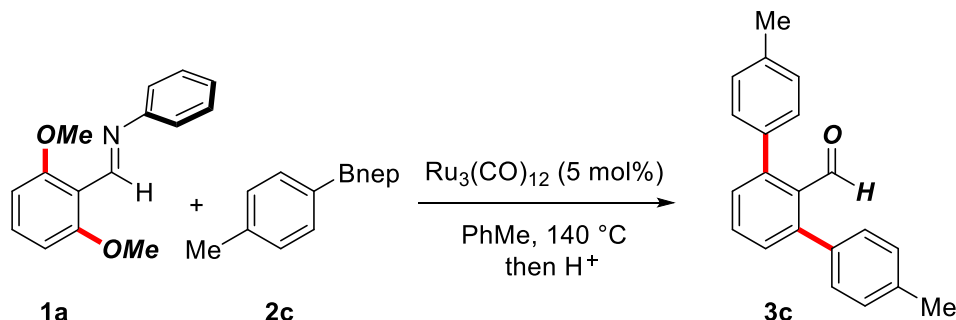

According to the general procedure, *N*-(2,6-dimethoxybenzylidene)aniline (**1a**, 48.3 mg, 0.20 mmol) was reacted with 4-Me-C<sub>4</sub>H<sub>4</sub>-Bnep (**2c**, 102.1 mg, 0.50 mmol), and Ru<sub>3</sub>(CO)<sub>12</sub> (6.4 mg, 5 mol%) in toluene (1.0 M) at 140 °C for 10 h. Acidic work-up and purification by chromatography afforded **3c** in 66% yield (37.8 mg). White solid. **Mp** = 106–107 °C. **<sup>1</sup>H NMR (400 MHz, CDCl<sub>3</sub>)** δ 9.95 (s, 1H), 7.55 (t, *J* = 7.6 Hz, 1H), 7.35 (d, *J* = 7.6 Hz, 2H), 7.23 (br, 8H), 2.41 (s, 6H). **<sup>13</sup>C NMR (100 MHz, CDCl<sub>3</sub>)** δ 193.9, 144.4, 137.5, 136.9, 133.5, 131.6, 130.3, 129.7, 129.0, 21.3. **MS** = 286.1 (EI). **HRMS** calcd for C<sub>21</sub>H<sub>19</sub>O (M<sup>+</sup> + H) 287.1430 found 287.1431.

#### 4,4''-Diethyl-[1,1':3',1''-terphenyl]-2'-carbaldehyde (**3d**)

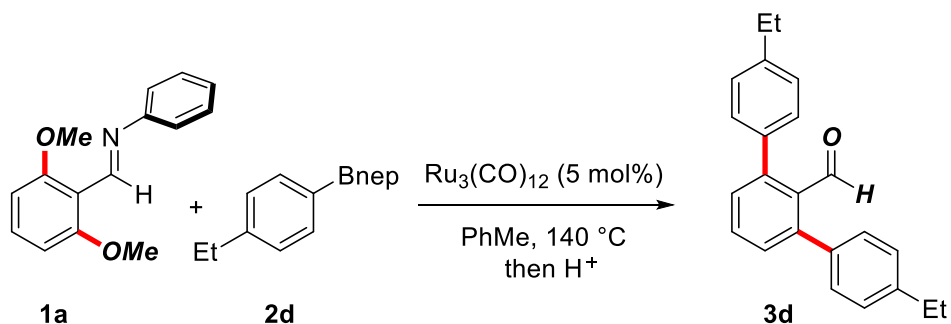

According to the general procedure, *N*-(2,6-dimethoxybenzylidene)aniline (**1a**, 48.3 mg, 0.20 mmol) was reacted with 4-Et-C<sub>4</sub>H<sub>4</sub>-Bnep (**2d**, 109.1 mg, 0.50 mmol), and Ru<sub>3</sub>(CO)<sub>12</sub> (6.4 mg, 5 mol%) in toluene (1.0 M) at 140 °C for 10 h. Acidic work-up and purification by chromatography afforded **3d** in 67% yield (42.1 mg). White solid. **Mp** = 60–61 °C. **<sup>1</sup>H NMR**

**(400 MHz, CDCl<sub>3</sub>)**  $\delta$  9.96 (s, 1H), 7.55 (t,  $J$  = 7.6 Hz, 1H), 7.36 (d,  $J$  = 7.6 Hz, 2H), 7.26 (br, 8H), 2.71 (q,  $J$  = 7.6 Hz, 4H), 1.29 (t,  $J$  = 7.6 Hz, 6H). **<sup>13</sup>C NMR (100 MHz, CDCl<sub>3</sub>)**  $\delta$  194.0, 144.4, 143.8, 137.1, 133.5, 131.5, 130.4, 129.7, 127.8, 28.7, 15.5. **MS** = 314.2 (EI). **HRMS** calcd for C<sub>23</sub>H<sub>23</sub>O (M<sup>+</sup> + H) 315.1743 found 315.1743.

**[1,1':4',1'':3'',1''':4''',1''''-Quinquephenyl]-2''-carbaldehyde (3e)**

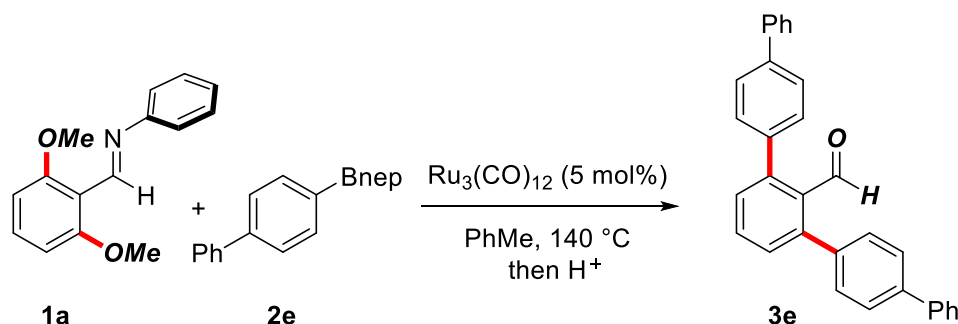

According to the general procedure, *N*-(2,6-dimethoxybenzylidene)aniline (**1a**, 48.3 mg, 0.20 mmol) was reacted with 4-Ph-C<sub>4</sub>H<sub>4</sub>-Bnep (**2e**, 133.1 mg, 0.50 mmol), and Ru<sub>3</sub>(CO)<sub>12</sub> (6.4 mg, 5 mol%) in toluene (1.0 M) at 140 °C for 10 h. Acidic work-up and purification by chromatography afforded **3e** in 70% yield (57.5 mg). White solid. **Mp** = 230-231 °C. **<sup>1</sup>H NMR (400 MHz, CDCl<sub>3</sub>)**  $\delta$  10.06 (s, 1H), 7.68 – 7.61 (m, 9H), 7.48 – 7.43 (m, 10H), 7.36 (t,  $J$  = 7.6 Hz, 2H). **<sup>13</sup>C NMR (100 MHz, CDCl<sub>3</sub>)**  $\delta$  193.8, 144.2, 140.7, 138.7, 133.4, 131.8, 130.6, 130.3, 129.0, 127.6, 127.3, 127.1. **MS** = 410.2 (EI). **HRMS** calcd for C<sub>31</sub>H<sub>23</sub>O (M<sup>+</sup> + H) 411.1743 found 411.1745.

**4,4''-Dichloro-[1,1':3',1''-terphenyl]-2''-carbaldehyde (3f)**

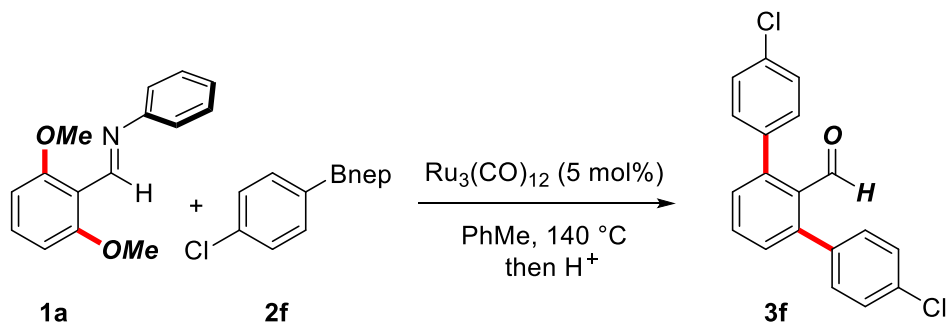

According to the general procedure, *N*-(2,6-dimethoxybenzylidene)aniline (**1a**, 48.3 mg, 0.20 mmol) was reacted with 4-Cl-C<sub>6</sub>H<sub>4</sub>-Bnep (**2f**, 112.3 mg, 0.50 mmol), and Ru<sub>3</sub>(CO)<sub>12</sub> (6.4 mg, 5

mol%) in toluene (1.0 M) at 140 °C for 10 h. Acidic work-up and purification by chromatography afforded **3f** in 58% yield (37.9 mg). White solid. **Mp** = 126-128 °C. **<sup>1</sup>H NMR (400 MHz, CDCl<sub>3</sub>)** δ 9.91 (s, 1H), 7.60 (t, *J* = 8.0 Hz, 1H), 7.40 (d, *J* = 8.0 Hz, 4H), 7.36 (d, *J* = 8.0 Hz, 2H), 7.27 (d, *J* = 8.1 Hz, 4H). **<sup>13</sup>C NMR (100 MHz, CDCl<sub>3</sub>)** δ 193.0, 143.4, 138.0, 134.2, 133.1, 132.0, 131.0, 130.8, 128.6. **MS** = 326.0 (EI). **HRMS** calcd for C<sub>19</sub>H<sub>13</sub>Cl<sub>2</sub>O (M<sup>+</sup> + H) 327.0338 found 327.0340.

#### 4,4''-Difluoro-[1,1':3',1''-terphenyl]-2'-carbaldehyde (**3g**)

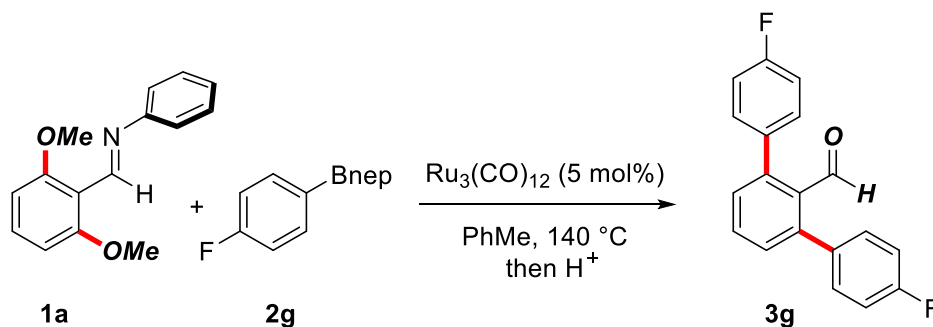

According to the general procedure, *N*-(2,6-dimethoxybenzylidene)aniline (**1a**, 48.3 mg, 0.20 mmol) was reacted with 4-F-C<sub>6</sub>H<sub>4</sub>-Bnep (**2g**, 104.0 mg, 0.50 mmol), and Ru<sub>3</sub>(CO)<sub>12</sub> (6.4 mg, 5 mol%) in toluene (1.0 M) at 140 °C for 10 h. Acidic work-up and purification by chromatography afforded **3g** in 67% yield (39.4 mg). White solid. **Mp** = 101-102 °C. **<sup>1</sup>H NMR (400 MHz, CDCl<sub>3</sub>)** δ 9.91 (s, 1H), 7.58 (t, *J* = 7.6 Hz, 1H), 7.36 (d, *J* = 7.6 Hz, 2H), 7.32 (m, 4H), 7.11 (t, *J* = 8.4 Hz, 4H). **<sup>13</sup>C NMR (100 MHz, CDCl<sub>3</sub>)** δ 193.3, 162.7 (d, *J* = 245.9 Hz), 143.5, 135.6 (d, *J* = 3.2 Hz), 133.3, 131.8, 131.3 (d, *J* = 7.1 Hz), 130.7, 115.3 (d, *J* = 21.4 Hz). **<sup>19</sup>F NMR (376 MHz, CDCl<sub>3</sub>)** δ -114.4 (s). **MS** = 294.1 (EI). **HRMS** calcd for C<sub>19</sub>H<sub>13</sub>F<sub>2</sub>O (M<sup>+</sup> + H) 295.0929 found 295.0928.



**4,4''-Bis(trifluoromethoxy)-[1,1':3',1''-terphenyl]-2'-carbaldehyde (3h)**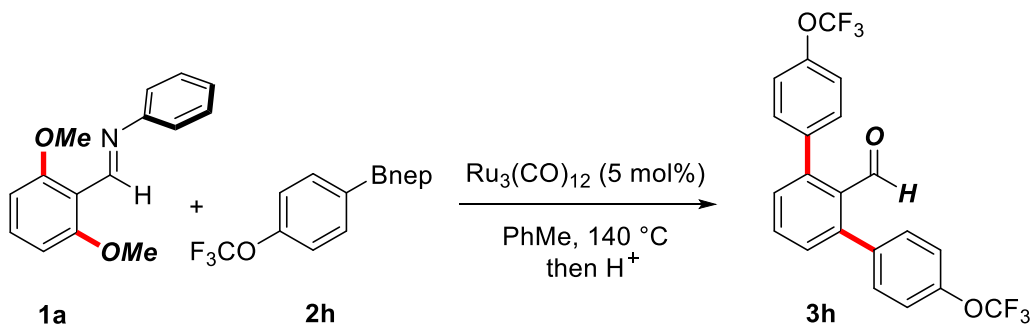

According to the general procedure, *N*-(2,6-dimethoxybenzylidene)aniline (**1a**, 48.3 mg, 0.20 mmol) was reacted with 4-CF<sub>3</sub>O-C<sub>6</sub>H<sub>4</sub>-Bnep (**2h**, 104.0 mg, 0.50 mmol), and Ru<sub>3</sub>(CO)<sub>12</sub> (6.4 mg, 5 mol%) in toluene (1.0 M) at 140 °C for 10 h. Acidic work-up and purification by chromatography afforded **3h** in 77% yield (65.7 mg). White solid. **Mp** = 90-91 °C. **<sup>1</sup>H NMR (400 MHz, CDCl<sub>3</sub>)** δ 9.92 (s, 1H), 7.62 (t, *J* = 7.8 Hz, 1H), 7.38 (m, 6H), 7.28 (m, 4H). **<sup>13</sup>C NMR (100 MHz, CDCl<sub>3</sub>)** δ 192.9, 149.2, 143.2, 138.2, 133.1, 132.0, 131.1, 130.9, 120.8, 120.7 (q, *J* = 255.9 Hz). **<sup>19</sup>F NMR (376 MHz, CDCl<sub>3</sub>)** δ -57.7 (s). **MS** = 426.1 (EI). **HRMS** calcd for C<sub>21</sub>H<sub>13</sub>F<sub>6</sub>O<sub>3</sub> (M<sup>+</sup> + H) 427.0763 found 427.0763.

**4,4''-Bis(trifluoromethyl)-[1,1':3',1''-terphenyl]-2'-carbaldehyde (3i)**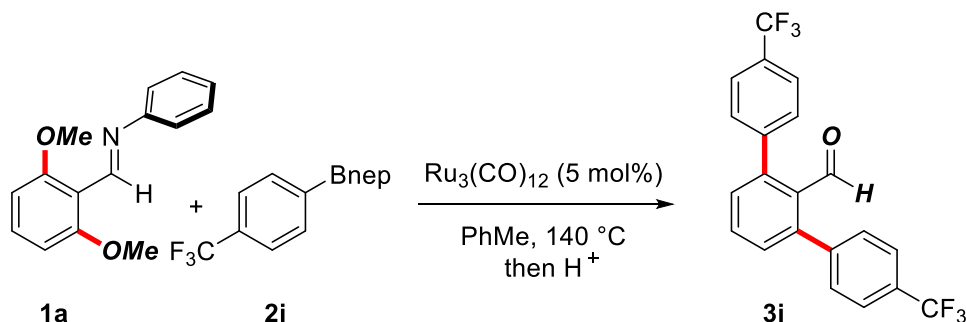

According to the general procedure, *N*-(2,6-dimethoxybenzylidene)aniline (**1a**, 48.3 mg, 0.20 mmol) was reacted with 4-CF<sub>3</sub>-C<sub>6</sub>H<sub>4</sub>-Bnep (**2i**, 129.0 mg, 0.50 mmol), and Ru<sub>3</sub>(CO)<sub>12</sub> (6.4 mg, 5 mol%) in toluene (1.0 M) at 140 °C for 10 h. Acidic work-up and purification by chromatography afforded **3i** in 71% yield (56.0 mg). White solid. **Mp** = 102-103 °C. **<sup>1</sup>H NMR (400 MHz, CDCl<sub>3</sub>)** δ 9.91 (s, 1H), 7.71 (d, *J* = 8.0 Hz, 4H), 7.68 (t, *J* = 8.0 Hz, 1H), 7.47 (d, *J* = 8.0 Hz, 4H), 7.42 (d, *J* = 7.6 Hz, 2H). **<sup>13</sup>C NMR (100 MHz, CDCl<sub>3</sub>)** δ 192.5, 143.3 (d, *J* = 8.0 Hz), 133.0, 132.2, 131.1, 130.3 (q, *J* = 32.6 Hz), 130.0, 125.4 (q, *J* = 3.7 Hz), 124.3 (d, *J* = 270.4

Hz). **<sup>19</sup>F NMR (376 MHz, CDCl<sub>3</sub>)** δ -62.5 (s). **MS** = 394.1 (EI). **HRMS** calcd for C<sub>21</sub>H<sub>12</sub>F<sub>6</sub>ONa (M<sup>+</sup> + Na) 417.0685 found 417.0686.

#### 4,4''-Diacetyl-[1,1':3',1''-terphenyl]-2'-carbaldehyde (3j)

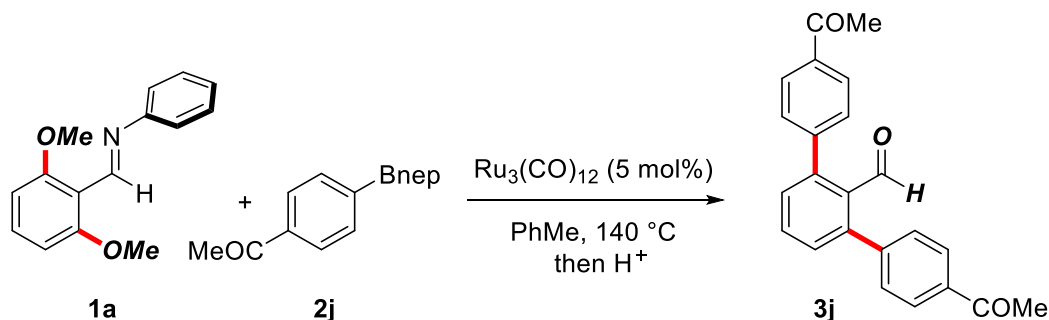

According to the general procedure, *N*-(2,6-dimethoxybenzylidene)aniline (**1a**, 48.3 mg, 0.20 mmol) was reacted with 4-MeCO-C<sub>6</sub>H<sub>4</sub>-Bnep (**2j**, 116.1 mg, 0.50 mmol), and Ru<sub>3</sub>(CO)<sub>12</sub> (6.4 mg, 5 mol%) in toluene (1.0 M) at 140 °C for 10 h. Acidic work-up and purification by chromatography afforded **3j** in 52% yield (35.6 mg). White solid. **Mp** = 155-156 °C. **<sup>1</sup>H NMR (400 MHz, CDCl<sub>3</sub>)** δ 9.93 (s, 1H), 8.03 (d, *J* = 8.4 Hz, 4H), 7.66 (t, *J* = 7.6 Hz, 1H), 7.44 (m, 6H), 2.65 (s, 6H). **<sup>13</sup>C NMR (100 MHz, CDCl<sub>3</sub>)** δ 197.7, 192.6, 144.5, 143.6, 136.5, 132.9, 132.1, 130.9, 129.9, 128.4, 26.8. **MS** = 342.1 (EI). **HRMS** calcd for C<sub>23</sub>H<sub>19</sub>O<sub>3</sub> (M<sup>+</sup> + H) 343.1329 found 343.1327.

#### Dimethyl 2'-formyl-[1,1':3',1''-terphenyl]-4,4''-dicarboxylate (3k)

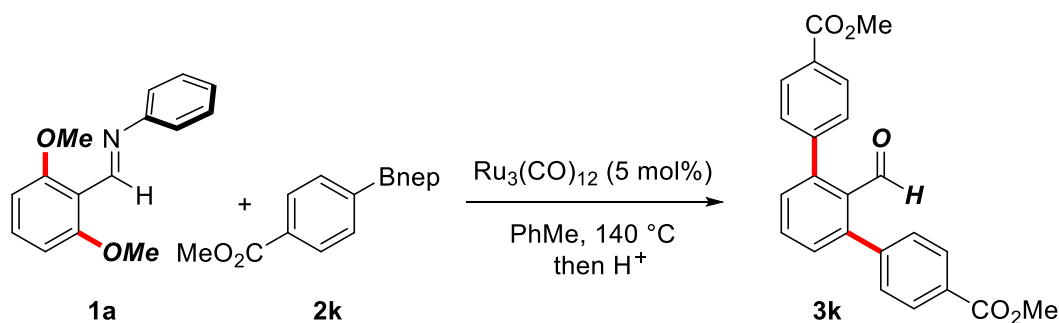

According to the general procedure, *N*-(2,6-dimethoxybenzylidene)aniline (**1a**, 48.3 mg, 0.20 mmol) was reacted with 4-MeO<sub>2</sub>C-C<sub>6</sub>H<sub>4</sub>-Bnep (**2k**, 124.1 mg, 0.50 mmol), and Ru<sub>3</sub>(CO)<sub>12</sub> (6.4 mg, 5 mol%) in toluene (1.0 M) at 140 °C for 10 h. Acidic work-up and purification by chromatography afforded **3k** in 75% yield (56.2 mg). Yellow solid. **Mp** = 100-102 °C. **<sup>1</sup>H NMR**

**(400 MHz, CDCl<sub>3</sub>)**  $\delta$  9.92 (s, 1H), 8.12 (d,  $J$  = 8.4 Hz, 4H), 7.64 (t,  $J$  = 7.6 Hz, 1H), 7.42 (d,  $J$  = 8.4 Hz, 6H), 3.95 (s, 6H). **<sup>13</sup>C NMR (100 MHz, CDCl<sub>3</sub>)**  $\delta$  192.6, 166.9, 144.3, 143.7, 133.0, 132.0, 130.9, 129.7, 129.7, 52.3. **MS** = 374.1 (EI). **HRMS** calcd for C<sub>23</sub>H<sub>19</sub>O<sub>5</sub> (M<sup>+</sup> + H) 375.1227 found 375.1228.

### 3,3'-Dimethoxy-[1,1':3',1''-terphenyl]-2'--carbaldehyde (**3l**)

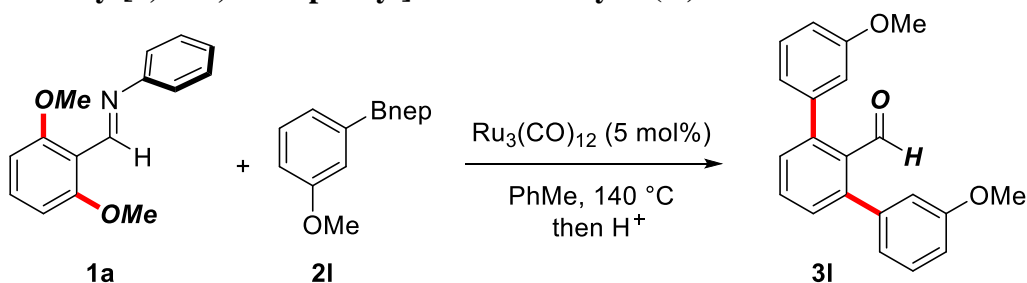

According to the general procedure, *N*-(2,6-dimethoxybenzylidene)aniline (**1a**, 48.3 mg, 0.20 mmol) was reacted with 3-MeO-C<sub>6</sub>H<sub>4</sub>-Bnep (**2l**, 110.1 mg, 0.50 mmol), and Ru<sub>3</sub>(CO)<sub>12</sub> (6.4 mg, 5 mol%) in toluene (1.0 M) at 140 °C for 10 h. Acidic work-up and purification by chromatography afforded **3l** in 55% yield (35.0 mg). White solid. **Mp** = 57-58 °C. **<sup>1</sup>H NMR (400 MHz, CDCl<sub>3</sub>)**  $\delta$  9.96 (s, 1H), 7.57 (t,  $J$  = 7.6 Hz, 1H), 7.39 (d,  $J$  = 7.6 Hz, 2H), 7.33 (t,  $J$  = 8.0 Hz, 2H), 6.91 (m, 6H), 3.83 (s, 6H). **<sup>13</sup>C NMR (100 MHz, CDCl<sub>3</sub>)**  $\delta$  193.6, 159.5, 144.2, 141.2, 133.5, 131.5, 130.4, 129.3, 122.3, 115.4, 113.4, 55.4. **MS** = 318.1 (EI). **HRMS** calcd for C<sub>21</sub>H<sub>18</sub>ONa (M<sup>+</sup> + Na) 341.1148 found 341.1146.

### 2,6-Di(naphthalen-2-yl)benzaldehyde (**3m**)

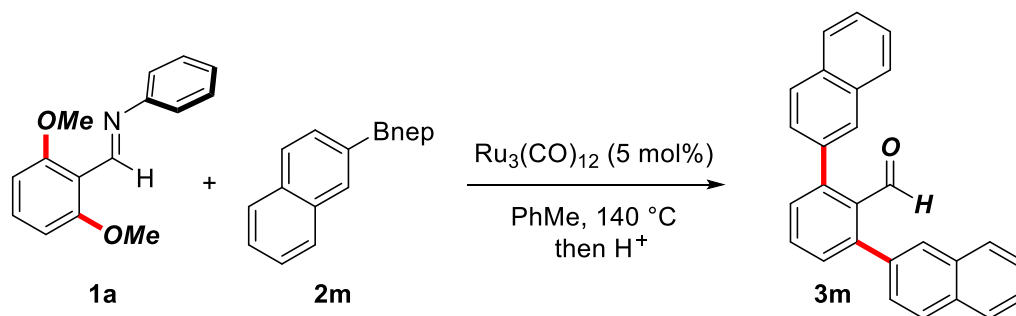

According to the general procedure, *N*-(2,6-dimethoxybenzylidene)aniline (**1a**, 48.3 mg, 0.20 mmol) was reacted with naphthalen-2-yl-Bnep (**2m**, 120.1 mg, 0.50 mmol), and Ru<sub>3</sub>(CO)<sub>12</sub> (6.4 mg, 5 mol%) in toluene (1.0 M) at 140 °C for 10 h. Acidic work-up and purification by chromatography afforded **3m** in 61% yield (39.4 mg). Yellow solid. **Mp** = 148-149 °C. **<sup>1</sup>H NMR**

**(400 MHz, CDCl<sub>3</sub>)**  $\delta$  10.02 (s, 1H), 7.87 (m, 8H), 7.63 (t,  $J$  = 7.6 Hz, 1H), 7.51 (m, 8H). **<sup>13</sup>C NMR (100 MHz, CDCl<sub>3</sub>)**  $\delta$  193.4, 144.6, 137.4, 133.5, 133.2, 132.8, 131.8, 130.9, 128.6, 128.2, 127.9, 127.8, 126.6, 126.4. **MS** = 358.1 (EI). **HRMS** calcd for C<sub>27</sub>H<sub>18</sub>ONa (M<sup>+</sup> + Na) 381.1250 found 381.1246.

### 2,6-Di(thiophen-3-yl)benzaldehyde (3n)

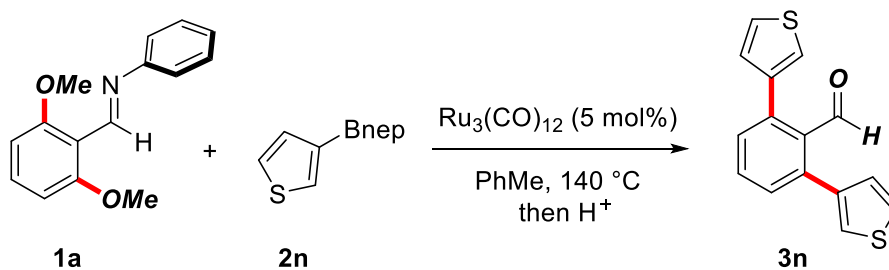

According to the general procedure, *N*-(2,6-dimethoxybenzylidene)aniline (**1a**, 48.3 mg, 0.20 mmol) was reacted with 3-thienyl-Bnep (**2n**, 98.0 mg, 0.50 mmol), and Ru<sub>3</sub>(CO)<sub>12</sub> (6.4 mg, 5 mol%) in toluene (1.0 M) at 140 °C for 10 h. Acidic work-up and purification by chromatography afforded **3n** in 61% yield (32.9 mg). White solid. **Mp** = 81–82 °C. **<sup>1</sup>H NMR (400 MHz, CDCl<sub>3</sub>)**  $\delta$  10.05 (s, 1H), 7.57 (t,  $J$  = 7.6 Hz, 1H), 7.44 (d,  $J$  = 7.7 Hz, 2H), 7.42 – 7.36 (m, 2H), 7.29 (d,  $J$  = 1.1 Hz, 2H), 7.15 (d,  $J$  = 4.8 Hz, 2H). **<sup>13</sup>C NMR (100 MHz, CDCl<sub>3</sub>)**  $\delta$  193.9, 140.0, 138.7, 133.9, 131.8, 130.4, 129.5, 125.7, 124.6. **MS** = 270.0 (EI). **HRMS** calcd for C<sub>15</sub>H<sub>11</sub>OS<sub>2</sub> (M<sup>+</sup> + H) 271.0246 found 271.0246.

### 2,6-Bis-(6-methoxypyridin-3-yl)benzaldehyde (3o)

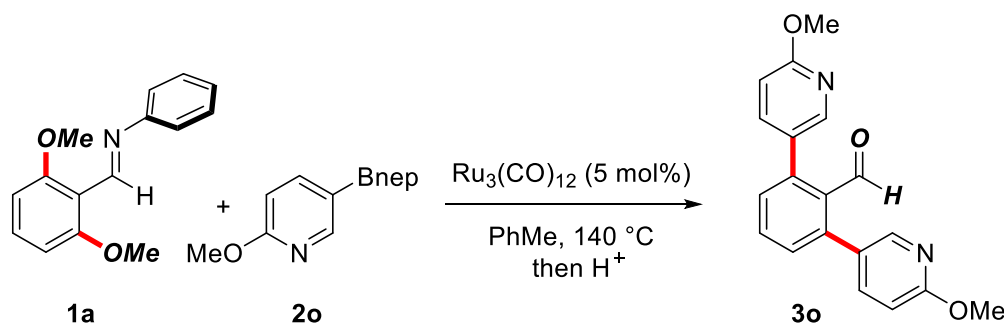

According to the general procedure, *N*-(2,6-dimethoxybenzylidene)aniline (**1a**, 48.3 mg, 0.20 mmol) was reacted with 6-MeO-3-C<sub>5</sub>H<sub>3</sub>N-Bnep (**2o**, 110.6 mg, 0.50 mmol), and Ru<sub>3</sub>(CO)<sub>12</sub> (6.4 mg, 5 mol%) in toluene (1.0 M) at 140 °C for 10 h. Acidic work-up and purification by

chromatography afforded **3o** in 73% yield (46.7 mg). White solid. **Mp** = 126-127 °C. **<sup>1</sup>H NMR (400 MHz, CDCl<sub>3</sub>)** δ 9.97 (s, 1H), 8.17 (s, 2H), 7.66 (t, *J* = 7.6 Hz, 1H), 7.61 (d, *J* = 8.4 Hz, 2H), 7.41 (d, *J* = 7.6 Hz, 2H), 6.84 (d, *J* = 8.5 Hz, 2H), 4.02 (s, 6H). **<sup>13</sup>C NMR (100 MHz, CDCl<sub>3</sub>)** δ 192.8, 164.0, 147.0, 141.3, 140.2, 133.3, 132.4, 131.1, 128.3, 110.4, 53.8. **MS** = 320.1 (EI). **HRMS** calcd for C<sub>19</sub>H<sub>17</sub>N<sub>2</sub>O<sub>3</sub> (M<sup>+</sup> + H) 321.1234 found 321.1234.

### 2,6-Bis(benzo[*d*][1,3]dioxol-5-yl)benzaldehyde (**3p**)

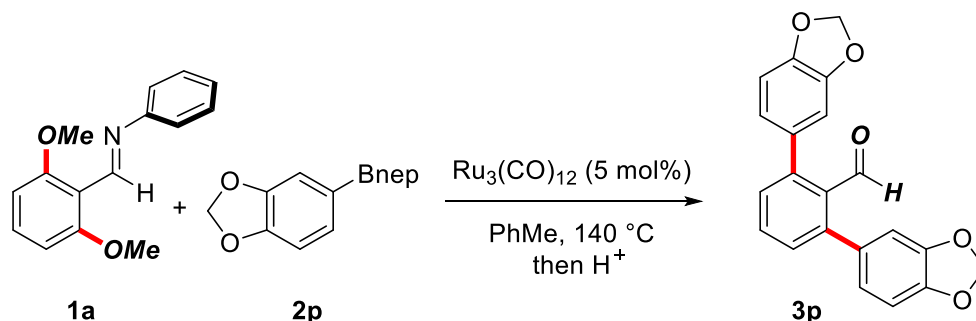

According to the general procedure, *N*-(2,6-dimethoxybenzylidene)aniline (**1a**, 48.3 mg, 0.20 mmol) was reacted with benzo[*d*][1,3]dioxol-5-yl-Bnep (**2p**, 117.0 mg, 0.50 mmol), and Ru<sub>3</sub>(CO)<sub>12</sub> (6.4 mg, 5 mol%) in toluene (1.0 M) at 140 °C for 10 h. Acidic work-up and purification by chromatography afforded **3p** in 51% yield (35.3 mg). White solid. **Mp** = 150 - 151 °C. **<sup>1</sup>H NMR (400 MHz, CDCl<sub>3</sub>)** δ 9.95 (s, 1H), 7.52 (t, *J* = 7.6 Hz, 1H), 7.33 (d, *J* = 7.6 Hz, 2H), 6.86 – 6.83 (m, 4H), 6.76 (dd, *J*<sub>1</sub> = 7.6, *J*<sub>2</sub> = 1.6 Hz, 2H). **<sup>13</sup>C NMR (100 MHz, CDCl<sub>3</sub>)** δ 193.7, 147.7, 147.5, 144.0, 133.7, 133.6, 131.6, 130.4, 123.5, 110.3, 108.2, 101.4. **MS** = 346.1 (EI). **HRMS** calcd for C<sub>21</sub>H<sub>14</sub>O<sub>5</sub>Na (M<sup>+</sup> + Na) 369.0733 found 369.0732.

### 4,4',5'-Trimethoxy-[1,1':3',1''-terphenyl]-2'-carbaldehyde (**3q**)

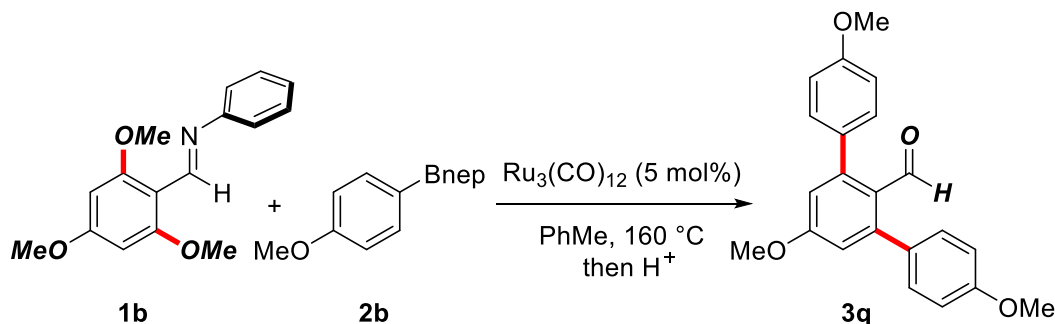

According to the general procedure, *N*-(2,4,6-trimethoxybenzylidene)aniline (**1b**, 54.3 mg, 0.20 mmol) was reacted with 4-MeO-C<sub>6</sub>H<sub>4</sub>-Bnep (**2b**, 110.0 mg, 0.50 mmol), and Ru<sub>3</sub>(CO)<sub>12</sub> (6.4 mg,

5 mol%) in toluene (1.0 M) at 100 °C for 10 h. Acidic work-up and purification by chromatography afforded **3q** in 70% yield (48.8 mg). White solid. **Mp** = 132–133 °C. **<sup>1</sup>H NMR (400 MHz, CDCl<sub>3</sub>)** δ 9.82 (s, 1H), 7.28 (d, *J* = 8.8 Hz, 4H), 6.97 (d, *J* = 8.8 Hz, 4H), 6.82 (s, 2H), 3.89 (s, 3H), 3.85 (s, 6H). **<sup>13</sup>C NMR (100 MHz, CDCl<sub>3</sub>)** δ 192.2, 161.6, 159.5, 147.4, 132.4, 130.8, 126.4, 115.8, 113.7, 55.7, 55.5. **MS** = 348.1 (EI). **HRMS** calcd for C<sub>22</sub>H<sub>21</sub>O<sub>4</sub> (M<sup>+</sup> + H) 349.1434 found 349.1433.

### 2-Phenyl-1-naphthaldehyde (**3r**)

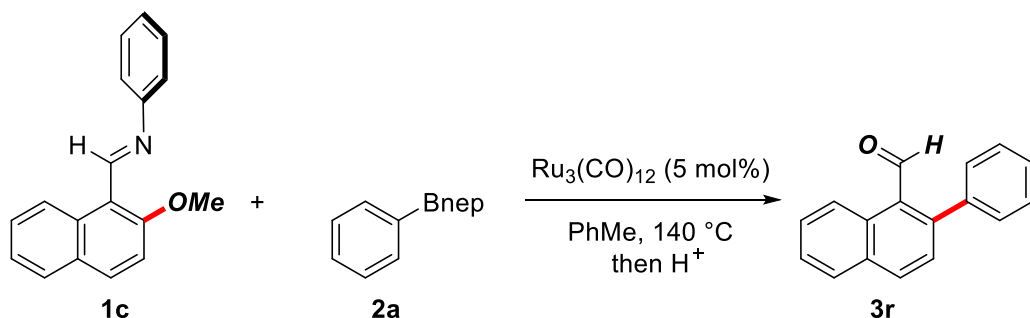

According to the general procedure, *N*-((2-methoxynaphthalen-1-yl)methylene)aniline (**1c**, 261 mg, 1.0 mmol) was reacted with Ph-Bnep (**2a**, 475 mg, 2.50 mmol), and Ru<sub>3</sub>(CO)<sub>12</sub> (32 mg, 5 mol%) in toluene (1.0 M) at 140 °C for 10 h. Acidic work-up and purification by chromatography afforded **3r** in 85% yield (198 mg). Yellow solid. **Mp** = 132–135 °C. **<sup>1</sup>H NMR (400 MHz, CDCl<sub>3</sub>)** δ 10.19 (s, 1H), 9.25 (d, *J* = 8.4 Hz, 1H), 8.07 (d, *J* = 8.4 Hz, 1H), 7.91 (d, *J* = 8.4 Hz, 1H), 7.69 (t, *J* = 7.2 Hz, 1H), 7.58 (t, *J* = 7.2 Hz, 1H), 7.53 (d, *J* = 8.4 Hz, 1H), 7.49 – 7.43 (m, 5H). **<sup>13</sup>C NMR (100 MHz, CDCl<sub>3</sub>)** δ 194.8, 148.1, 138.9, 134.0, 133.1, 130.7, 130.5, 129.4, 129.0, 128.5, 128.5, 128.4, 126.9, 126.0. **MS** = 232.1 (EI). **HRMS** calcd for C<sub>17</sub>H<sub>13</sub>O (M<sup>+</sup> + H) 233.0961 found 233.0961.

## Ru(0)-Catalyzed C–O Arylation of Aryl Methyl Ethers: Synthetic Utility

## Sequence 1. Sequential Bromination/ Suzuki Cross-Coupling/C–O Cross-Coupling.

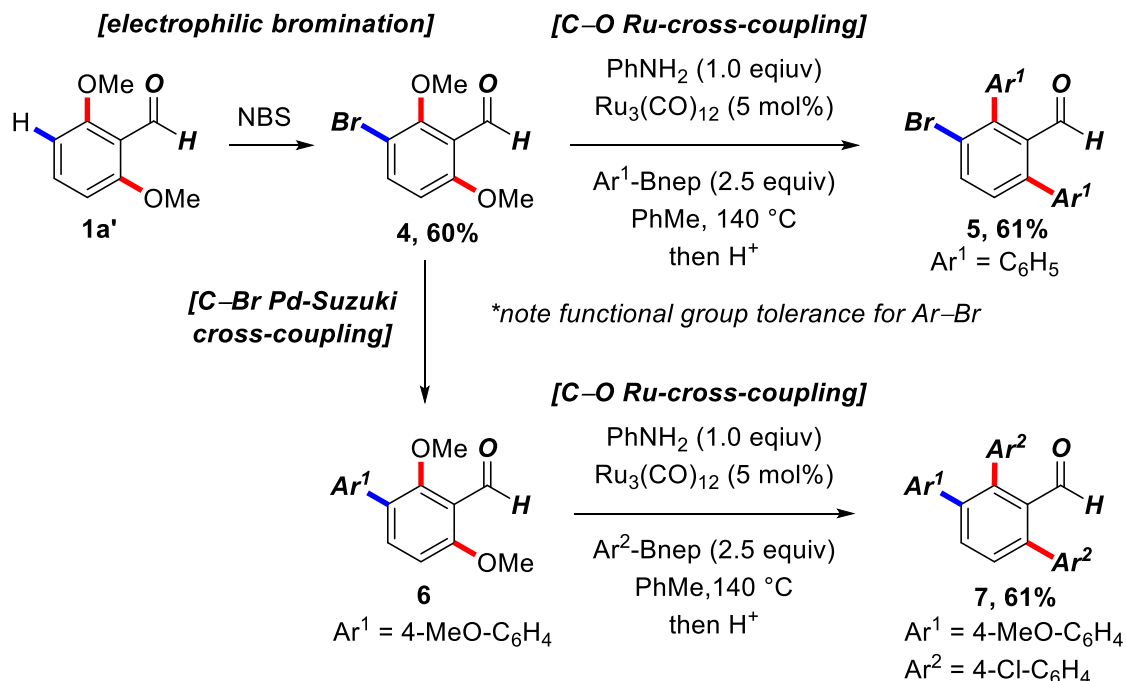

**3-Bromo-2,6-dimethoxybenzaldehyde (4).** To a solution of 2,6-dimethoxybenzaldehyde (10 mmol) in MeCN (1.0 M), NBS (12 mmol, 1.2 equiv) and NH<sub>4</sub>OAc (5 mmol, 0.50 equiv) were added at 0 °C, the resulting reaction mixture was slowly warmed up to room temperature and stirred at room temperature for 6 hours. After the indicated time, the reaction mixture was quenched with water (10 mL), extracted with diethyl ether (3 x 20 mL), organic layers were combined, dried and concentrated. Purification by chromatography on silica gel (EtOAc/hexanes) afforded the title product. Yield 60% (1.47 g). Yellow solid. **<sup>1</sup>H NMR (400 MHz, CDCl<sub>3</sub>)** δ 10.40 (s, 1H), 7.67 (d, *J* = 9.2 Hz, 1H), 6.63 (d, *J* = 9.2 Hz, 1H), 3.91 (s, 3H), 3.90 (s, 3H). **<sup>13</sup>C NMR (100 MHz, CDCl<sub>3</sub>)** δ 188.5, 161.3, 159.0, 138.6, 120.6, 109.2, 108.9, 62.7, 56.3. **MS** = 244.0 (EI). **HRMS** calcd for C<sub>9</sub>H<sub>10</sub>BrO<sub>3</sub> (M<sup>+</sup> + H) 244.9808 found 244.9809.

**4'-Bromo-[1,1':3',1''-terphenyl]-2'-carbaldehyde (5).** According to the general procedure, an oven-dried vial equipped with a stir bar was charged with aldehyde **4** (0.2 mmol, 1.0 equiv), PhNH<sub>2</sub> (0.2 mmol, 1.0 equiv), Ph–Bnep (**2a**, 95.0 mg, 0.50 mmol), Ru<sub>3</sub>(CO)<sub>12</sub> (6.4 mg, 5 mol%), MgSO<sub>4</sub> (1.0 equiv) and toluene (1.0 M), and the resulting reaction mixture was stirred at 140 °C for 10 h. After the indicated time, the reaction was cooled down to room temperature and

subjected to the standard imine deprotection procedure (diethyl ether, HCl, 1.0 N, aq, 3 h, room temperature). Purification by chromatography on silica gel afforded the title product. Yield 61% (41.1 mg). White solid. **Mp** = 118-119 °C. **<sup>1</sup>H NMR (400 MHz, CDCl<sub>3</sub>)** δ 9.72 (s, 1H), 7.85 (d, *J* = 8.4 Hz, 1H), 7.45 – 7.40 (m, 6H), 7.32 – 7.28 (m, 2H), 7.26 – 7.23 (m, 3H). **<sup>13</sup>C NMR (100 MHz, CDCl<sub>3</sub>)** δ 192.6, 143.7, 143.3, 138.7, 138.4, 135.9, 135.7, 131.8, 129.8, 129.6, 128.5, 128.3, 128.2, 128.1, 124.8. **MS** = 336.0 (EI). **HRMS** calcd for C<sub>19</sub>H<sub>14</sub>BrO (M<sup>+</sup> + H) 337.0223 found 337.0222.

**2,4,4'-Trimethoxy-[1,1'-biphenyl]-3-carbaldehyde (6)**. Under argon, to aldehyde **4** (neat, 1.0 mmol) were sequentially added 4-MeO-C<sub>6</sub>H<sub>4</sub>-B(OH)<sub>2</sub> (1.2 equiv, 1.2 mmol), Pd(OAc)<sub>2</sub> (0.01 mmol, 1 mol%), Na<sub>2</sub>CO<sub>3</sub> (2.0 equiv, 2.0 mmol), and EtOH:water (0.10 M, 1:1 v/vol). The resulting mixture was stirred at 80 °C for 6 hours. After the indicated time, the reaction was cooled down to room temperature, extracted with diethyl ether (3 x 20 mL), washed with water (3 x 20 mL), organic layers were combined, dried and concentrated. The crude product **6** was directly used in the next step without further purification.

**4''-Chloro-4'-(4-chlorophenyl)-4-methoxy-[1,1':2',1''-terphenyl]-3'-carbaldehyde (7)**. According to the general procedure, an oven-dried vial equipped with a stir bar was charged with aldehyde **6** (0.2 mmol, 1.0 equiv), PhNH<sub>2</sub> (0.2 mmol, 1.0 equiv), 4-Cl-C<sub>6</sub>H<sub>4</sub>-Bnep (0.50 mmol), Ru<sub>3</sub>(CO)<sub>12</sub> (6.4 mg, 5 mol%), MgSO<sub>4</sub> (1.0 equiv) and toluene (1.0 M), and the resulting reaction mixture was stirred at 140 °C for 10 h. After the indicated time, the reaction was cooled down to room temperature and subjected to the standard imine deprotection procedure (diethyl ether, HCl, 1.0 N, aq, 3 h, room temperature). Purification by chromatography on silica gel afforded the title product. Yield 61% (52.9 mg). Yellow solid. **Mp** = 167-168 °C. **<sup>1</sup>H NMR (400 MHz, CDCl<sub>3</sub>)** δ 9.82 (s, 1H), 7.57 (d, *J* = 8.0 Hz, 1H), 7.39 (m, 3H), 7.29 (d, *J* = 8.4 Hz, 2H), 7.21 (d, *J* = 8.0 Hz, 2H), 7.01 (d, *J* = 8.4 Hz, 2H), 6.95 (d, *J* = 8.4 Hz, 2H), 6.74 (d, *J* = 8.4 Hz, 2H), 3.77 (s, 3H). **<sup>13</sup>C NMR (100 MHz, CDCl<sub>3</sub>)** δ 193.6, 158.8, 141.9, 141.4, 141.1, 138.2, 136.1, 134.5, 134.1, 133.8, 133.6, 132.4, 132.1, 131.0, 130.8, 128.6, 128.3, 113.7, 55.4. **MS** = 432.1 (EI). **HRMS** calcd for C<sub>26</sub>H<sub>19</sub>Cl<sub>2</sub>O<sub>2</sub> (M<sup>+</sup> + H) 433.0757 found 433.0756.



**Sequence 2. Sequential Ru(0)-Catalyzed C–H/ C–O Cross-Coupling.**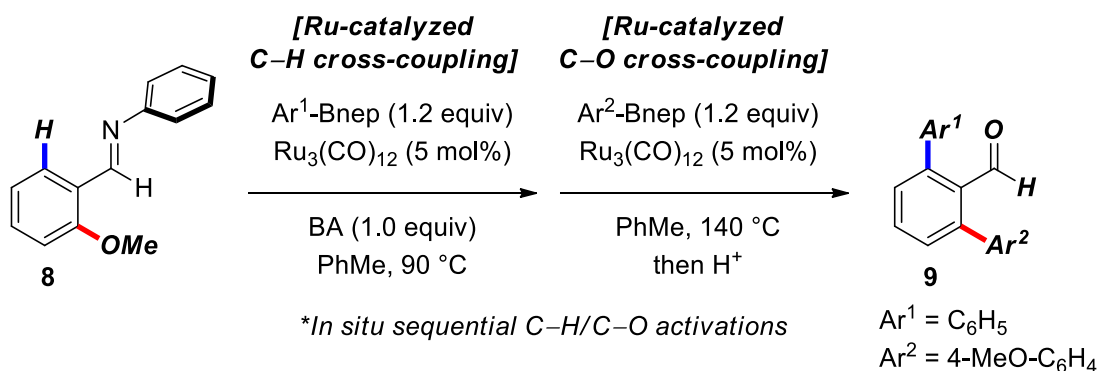

**4-Methoxy-[1,1':3',1''-terphenyl]-2'-carbaldehyde (9).** An oven-dried vial equipped with a stir bar was charged with *N*-(2-methoxybenzylidene)aniline **8** (47.0 mg, 0.2 mmol), Ph–Bnep (38.0 mg, 0.2 mmol), (*E*)-4-phenylbut-3-en-2-one (BA, 35.1 mg, 0.24 mmol), Ru<sub>3</sub>(CO)<sub>12</sub> (6.4 mg, 5 mol%) and toluene (1.0 M), and the resulting reaction mixture was stirred at 90 °C for 10 h. After the indicated time, the reaction mixture was cooled down to room temperature, 4-MeO-C<sub>6</sub>H<sub>4</sub>–Bnep (0.2 mmol) and Ru<sub>3</sub>(CO)<sub>12</sub> (6.4 mg, 5 mol%) were sequentially added, and the resulting reaction mixture was stirred at 140 °C for 10 h. After the indicated time, the reaction was cooled down to room temperature and subjected to the standard imine deprotection procedure (diethyl ether, HCl, 1.0 N, aq, 3 h, room temperature). Purification by chromatography on silica gel afforded the title product. Yield 63% (36.3 mg). White solid. **Mp** = 101-102 °C. **<sup>1</sup>H NMR (400 MHz, CDCl<sub>3</sub>)** δ 9.95 (s, 1H), 7.56 (t, *J* = 7.6 Hz, 1H), 7.43 – 7.33 (m, 7H), 7.28 (d, *J* = 8.4 Hz, 2H), 6.96 (d, *J* = 8.4 Hz, 2H), 3.85 (s, 3H). **<sup>13</sup>C NMR (100 MHz, CDCl<sub>3</sub>)** δ 193.8, 159.6, 144.3, 144.2, 140.0, 133.5, 131.9, 131.6, 131.0, 130.6, 130.2, 129.7, 128.3, 127.7, 113.9, 55.5. **MS** = 288.1 (EI). **HRMS** calcd for C<sub>20</sub>H<sub>17</sub>O<sub>2</sub> (M<sup>+</sup> + H) 289.1223 found 289.1223.

**Sequence 3.** Sequential Ru(0)-Catalyzed C–O Cross-Coupling/*S<sub>N</sub>Ar* Amination.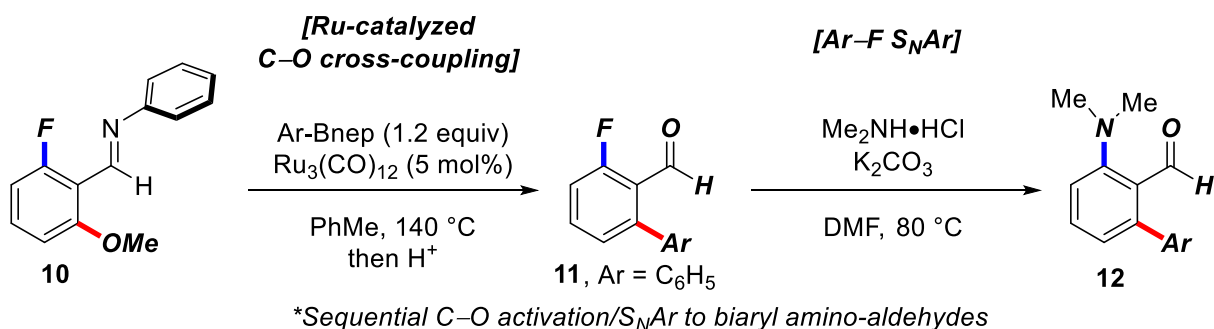

**3-Fluoro-[1,1'-biphenyl]-2-carbaldehyde (11).** According to the general procedure A, an oven-dried vial equipped with a stir bar was charged with *N*-(2-fluoro-6-methoxybenzylidene)aniline (0.20 mmol), Ph–Bnep (38.0 mg, 0.2 mmol), Ru<sub>3</sub>(CO)<sub>12</sub> (6.4 mg, 5 mol%) and toluene (1.0 M), and the resulting reaction mixture was stirred at 140 °C for 10 h. After the indicated time, the reaction mixture was cooled down to room temperature, and subjected to the standard imine deprotection procedure (diethyl ether, HCl, 1.0 N, aq, 3 h, room temperature). Purification by chromatography on silica gel afforded the title product. Yield 70% (28.0 mg). Colorless oil. **<sup>1</sup>H NMR (600 MHz, CDCl<sub>3</sub>)** δ 9.95 (s, 1H), 7.60 – 7.55 (m, 1H), 7.48 – 7.43 (m, 3H), 7.36 – 7.32 (m, 2H), 7.22 (d, *J* = 7.7 Hz, 1H), 7.17 (t, *J* = 9.0 Hz, 1H). **<sup>13</sup>C NMR (150 MHz, CDCl<sub>3</sub>)** δ 189.5, 162.0 (d, *J* = 261.2 Hz), 147.0, 137.4 (d, *J* = 2.0 Hz), 134.5 (d, *J* = 10.0 Hz), 129.8, 128.5, 128.5, 126.7 (d, *J* = 3.3 Hz), 122.9 (d, *J* = 7.3 Hz), 115.9 (d, *J* = 21.4 Hz). **<sup>19</sup>F NMR (565 MHz, CDCl<sub>3</sub>)** δ -116.0 (m, 1F). **MS** = 200.1 (EI). **HRMS** calcd for C<sub>13</sub>H<sub>9</sub>FONa (M<sup>+</sup> + Na) 223.0530 found 223.0531.

**3-(Dimethylamino)-[1,1'-biphenyl]-2-carbaldehyde (12).** To the above compound **11** (0.2 mmol), Me<sub>2</sub>NH·HCl (10 mmol, 5 equiv), K<sub>2</sub>CO<sub>3</sub> (15 mmol), and DMF (5 mL) were added. The mixture was heated at 80 °C for 12 hours. After the indicated time, the reaction mixture was cooled down to room temperature. Purification by chromatography on silica gel afforded the title product. Yield 91% (41.0 mg). Yellow solid. **<sup>1</sup>H NMR (400 MHz, CDCl<sub>3</sub>)** δ 9.80 (s, 1H), 7.45 – 7.34 (m, 6H), 7.02 (d, *J* = 8.4 Hz, 1H), 6.86 (d, *J* = 7.2 Hz, 1H), 2.99 (s, 6H). **<sup>13</sup>C NMR (100 MHz, CDCl<sub>3</sub>)** δ 190.2, 154.4, 149.2, 140.1, 133.4, 130.1, 128.3, 127.9, 123.9, 121.7, 116.1, 45.1. **MS** = 225.1 (EI). **HRMS** calcd for C<sub>15</sub>H<sub>16</sub>NO (M<sup>+</sup> + H) 226.1226 found 226.1225.

**Sequence 4.** Traceless Ru(0)-Catalyzed C–H/C–O Cross-Coupling/Aldehyde Decarbonylation.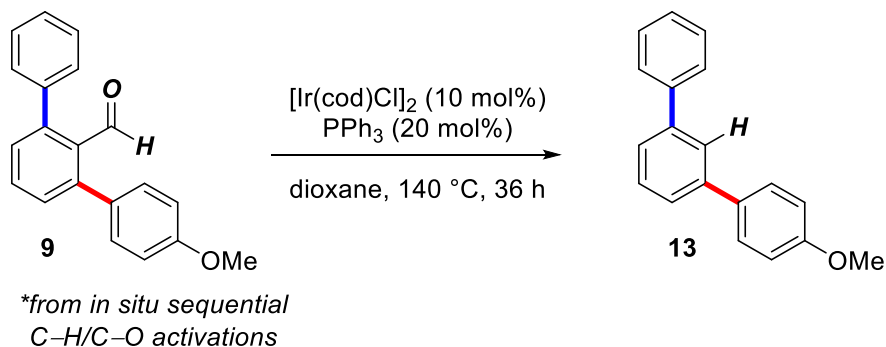

**4-Methoxy-1,1':3',1''-terphenyl (13).** An oven-dried vial equipped with a stir bar was charged with 4-methoxy-[1,1':3',1''-terphenyl]-2'-carbaldehyde (10.0 mg, 0.035 mmol), [Ir(cod)Cl]<sub>2</sub> (2.4 mg, 0.0035 mmol), PPh<sub>3</sub> (1.9 mg, 0.007 mmol), and dioxane (0.2 M), and the resulting reaction mixture was stirred at 140 °C for 36 h. After the indicated time, the reaction mixture was cooled down to room temperature. Purification by chromatography on silica gel afforded the title product. Yield 63% (5.7 mg). White solid. **Mp** = 82-84 °C. **<sup>1</sup>H NMR (400 MHz, CDCl<sub>3</sub>)** δ 7.76 (s, 1H), 7.64 (d, *J* = 7.6 Hz, 2H), 7.58 (d, *J* = 8.4 Hz, 2H), 7.55 – 7.53 (m, 2H), 7.50 – 7.44 (m, 3H), 7.36 (t, *J* = 7.6 Hz, 1H), 7.01 (d, *J* = 8.4 Hz, 2H), 3.86 (s, 3H). **<sup>13</sup>C NMR (100 MHz, CDCl<sub>3</sub>)** δ 159.5, 142.0, 141.6, 141.5, 133.9, 129.3, 128.9, 128.4, 127.5, 127.4, 125.9, 125.9, 125.7, 114.5, 55.5. **MS** = 260.1 (EI). **HRMS** calcd for C<sub>19</sub>H<sub>16</sub>ONa (M<sup>+</sup> + Na) 283.1099 found 283.1101.

### Mechanistic Selectivity Studies – Imines

*General Procedure.* An oven-dried vial equipped with a stir bar was charged with two imine substrates (each 0.4 mmol, 2.0 equiv), Ph–Bnep (**2a**, 38.0 mg, 0.20 mmol, 1.0 equiv), Ru<sub>3</sub>(CO)<sub>12</sub> (6.4 mg, 5 mol%), placed under a positive pressure of argon, and subjected to three evacuation/backfilling cycles under high vacuum. Toluene (1.0 M) was added at room temperature, the reaction mixture was placed in a preheated oil bath at 140 °C, and stirred for 10 h at 140 °C. After the indicated time, the reaction mixture was cooled down to room temperature. The sample was analyzed by <sup>1</sup>H NMR (CDCl<sub>3</sub>, 400 MHz) and GC-MS to obtain conversion and yield using internal standard and comparison with authentic samples.

### Mechanistic Selectivity Studies – Organoboranes

*General Procedure.* An oven-dried vial equipped with a stir bar was charged with an imine substrate (0.2 mmol, 1.0 equiv), two aryl boronic ester substrates (each 0.50 mmol, 2.5 equiv), Ru<sub>3</sub>(CO)<sub>12</sub> (6.4 mg, 5 mol%), placed under a positive pressure of argon, and subjected to three evacuation/backfilling cycles under high vacuum. Toluene (1.0 M) was added at room temperature, the reaction mixture was placed in a preheated oil bath at 140 °C, and stirred for 10 h at 140 °C. After the indicated time, the reaction mixture was cooled down to room temperature. The sample was analyzed by <sup>1</sup>H NMR (CDCl<sub>3</sub>, 400 MHz) and GC-MS to obtain conversion and yield using internal standard and comparison with authentic samples.

## References

1. Trost, B. M.; Fleming, I. *Comprehensive Organic Synthesis*, 1<sup>st</sup> ed.; Pergamon Press: Oxford, 1991.
2. Smith, M. B.; March, J. *Advanced Organic Chemistry*, 6<sup>th</sup> ed.; Wiley: Hoboken, 2007.
3. Layer, R. W. The Chemistry of Imines. *Chem. Rev.* **1963**, *63*, 489-510.
4. Patil, R. D.; Adimurthy, S. Catalytic Methods for Imine Synthesis. *Asian J. Org. Chem.* **2013**, *2*, 726-744.
5. Tredwell, M. J.; Gulias, M.; Gaunt-Bremeyer, N.; Johansson, C. C. C.; Collins, B. S. L.; Gaunt, M. J. Palladium(II)-Catalyzed C–H Bond Arylation of Electron-Deficient Arenes at Room Temperature. *Angew. Chem. Int. Ed.* **2011**, *50*, 1076-1079.
6. Iwai, Y.; Gligorich, K. M.; Sigman, M. S. Aerobic Alcohol Oxidation Coupled to Palladium-Catalyzed Alkene Hydroarylation with Boronic Esters. *Angew. Chem. Int. Ed.* **2008**, *47*, 3219-3222.
7. Zhao, Y.; Snieckus, V. Beyond Directed Ortho Metallation: Ru-Catalyzed C<sub>Ar</sub>–O Activation/Cross-Coupling Reaction by Amide Chelation. *J. Am. Chem. Soc.* **2014**, *136*, 11224-11227.

**$^1\text{H}$ ,  $^{13}\text{C}$  and  $^{19}\text{F}$  NMR Spectra**

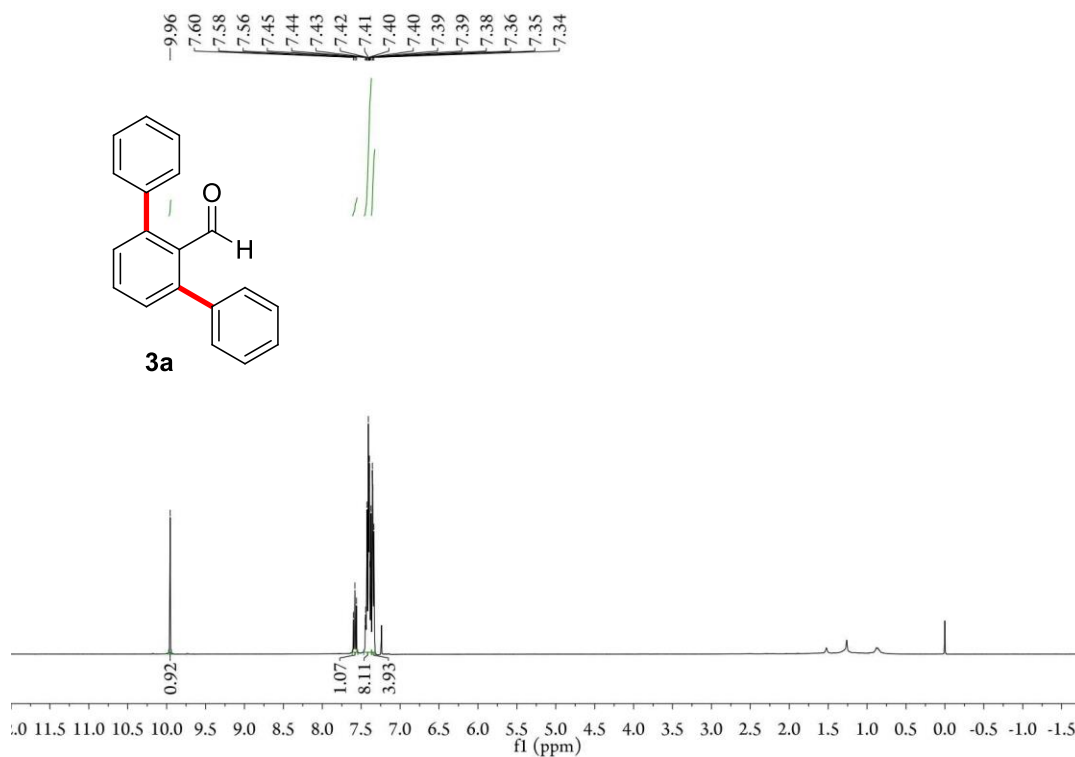

Figure S1.  $^1\text{H}$  NMR (400 MHz,  $\text{CDCl}_3$ ) Spectrum of Compound **3a**

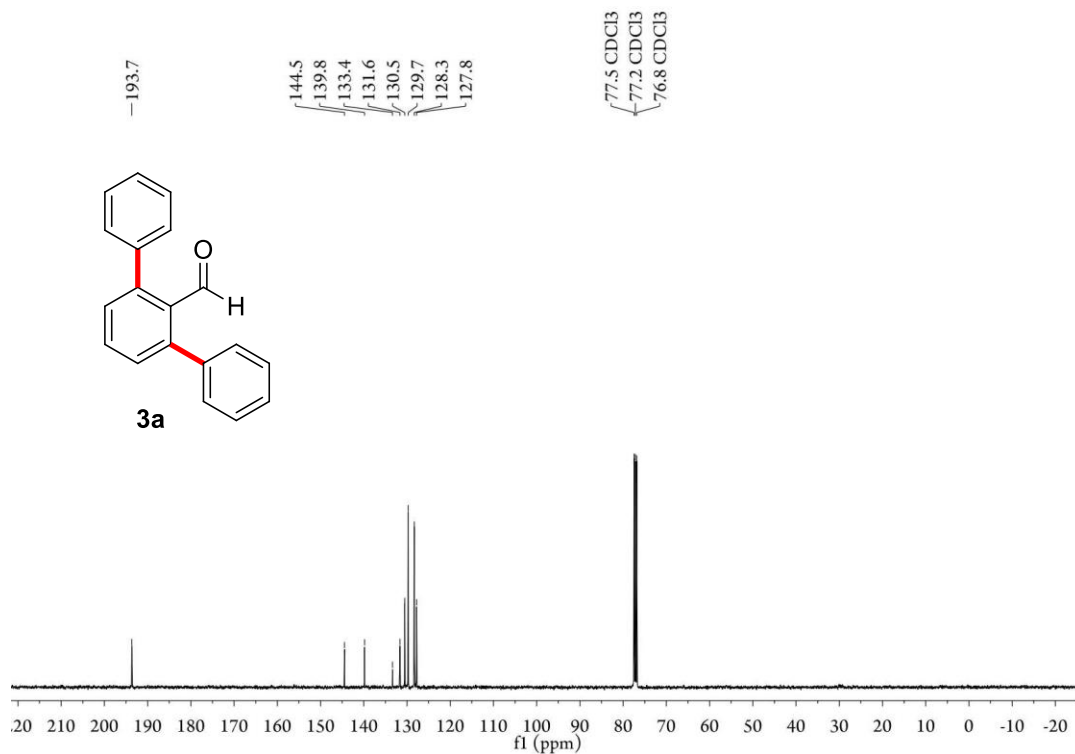

Figure S2.  $^{13}\text{C}$  NMR (100 MHz,  $\text{CDCl}_3$ ) Spectrum of Compound **3a**

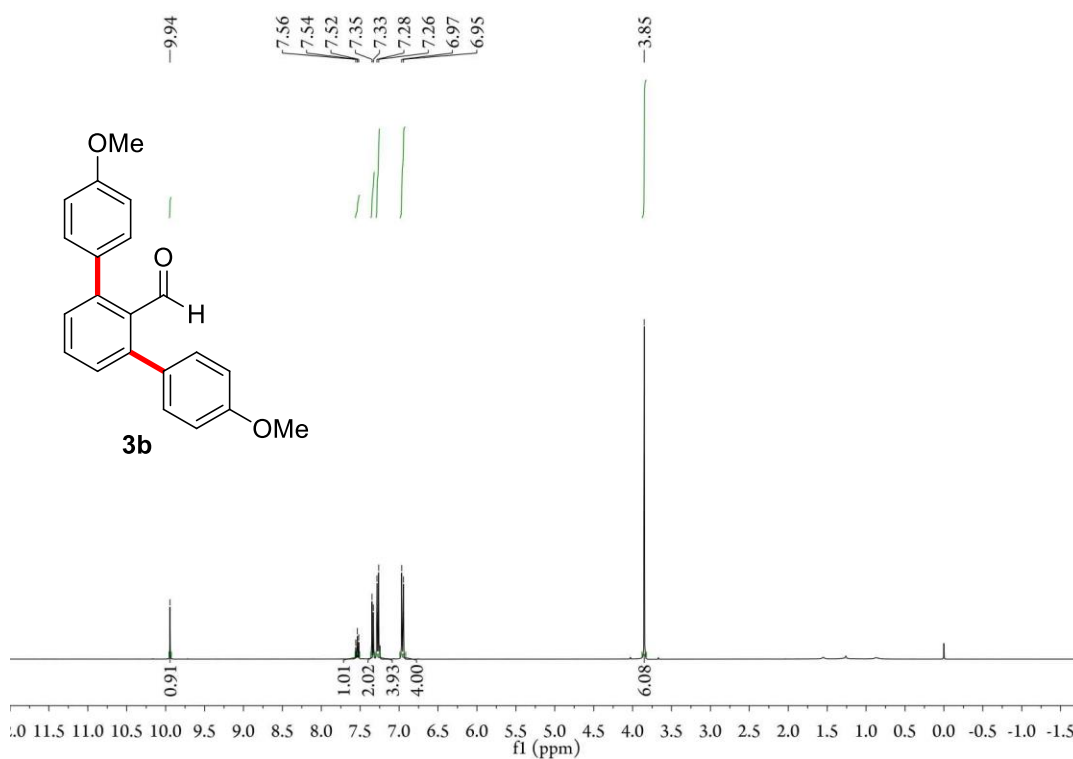

Figure S3.  $^1\text{H NMR}$  (400 MHz,  $\text{CDCl}_3$ ) Spectrum of Compound **3b**

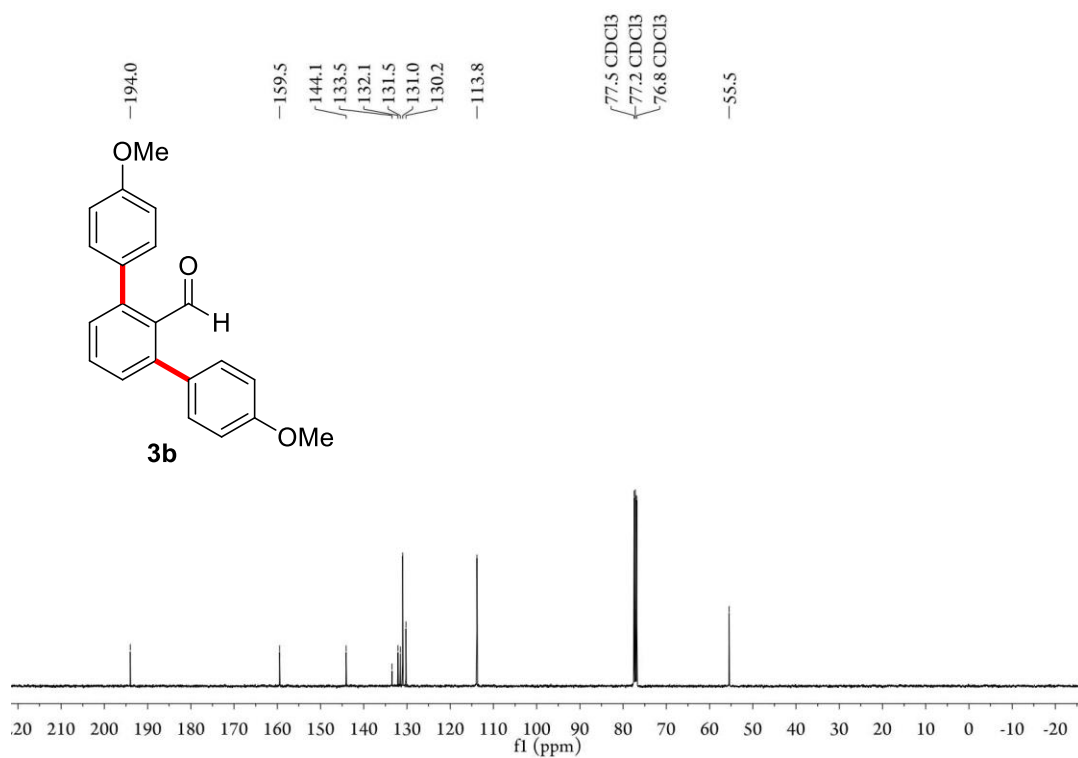

Figure S4.  $^{13}\text{C NMR}$  (100 MHz,  $\text{CDCl}_3$ ) Spectrum of Compound **3b**

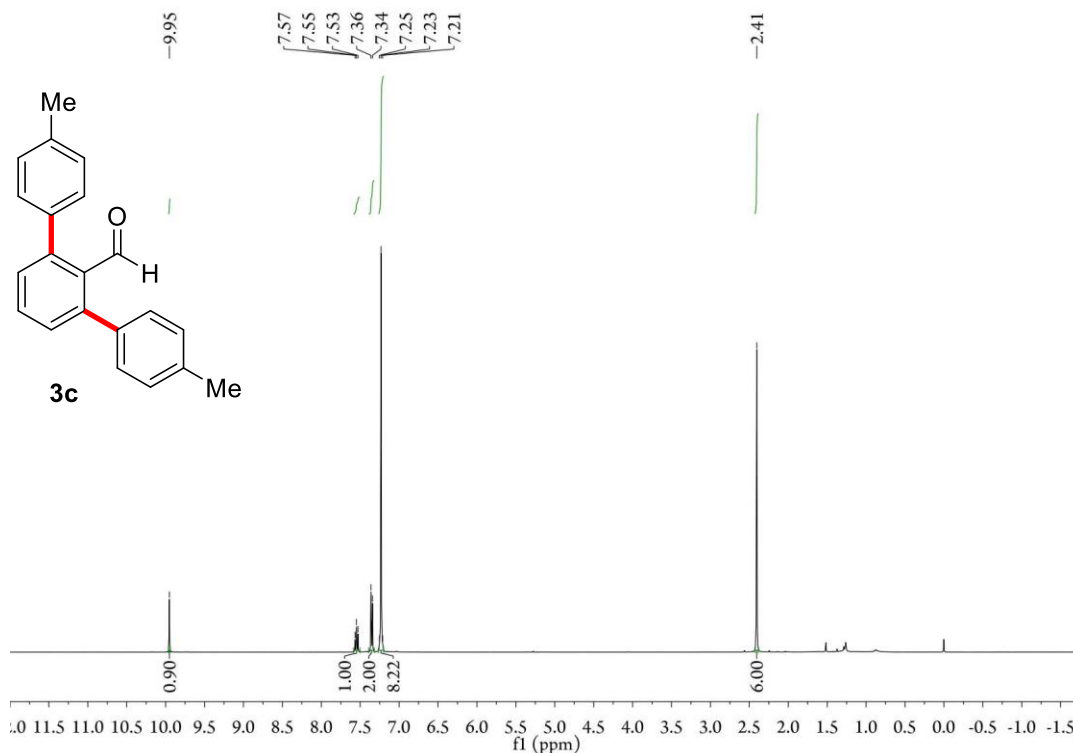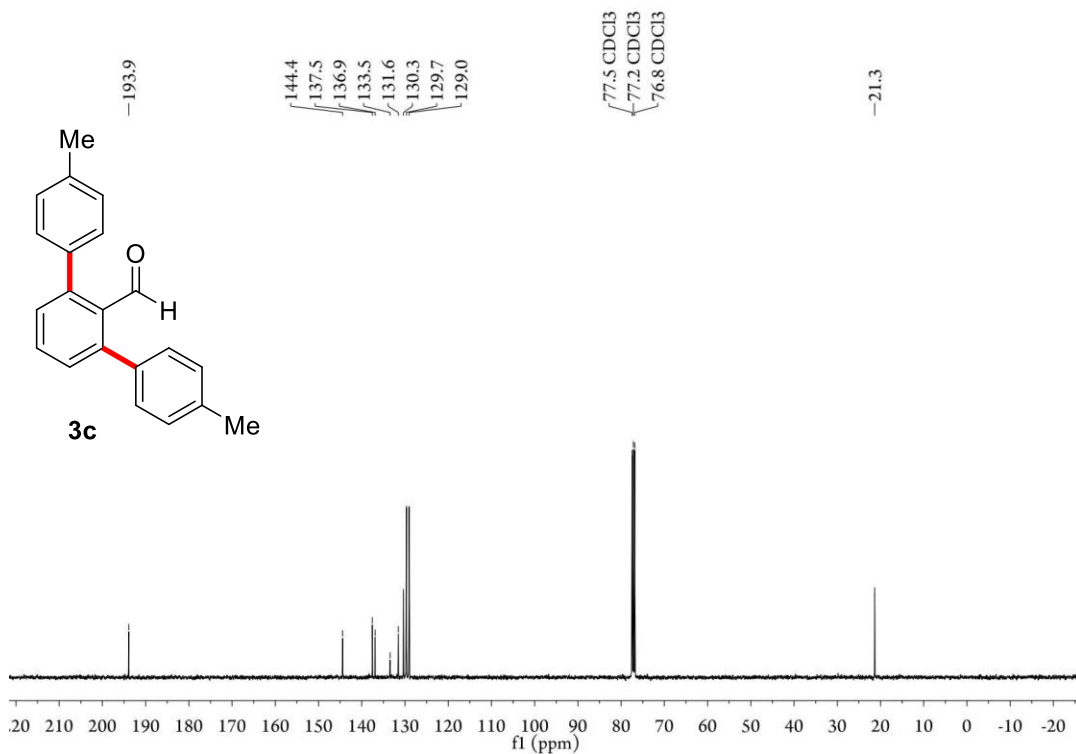



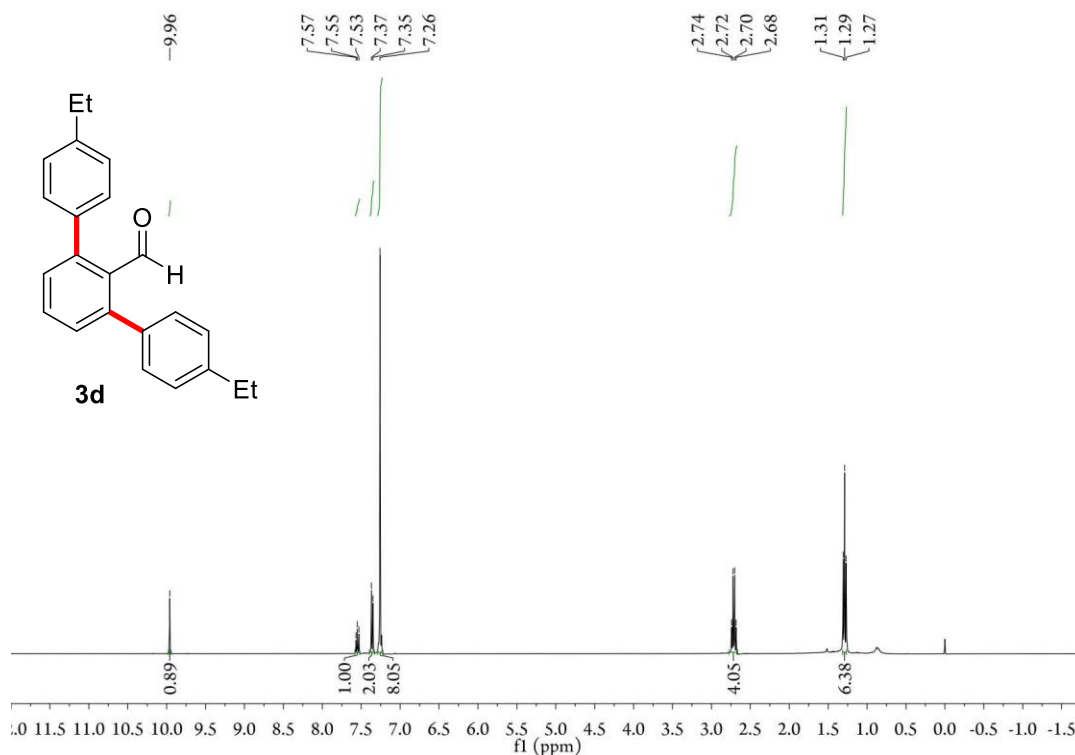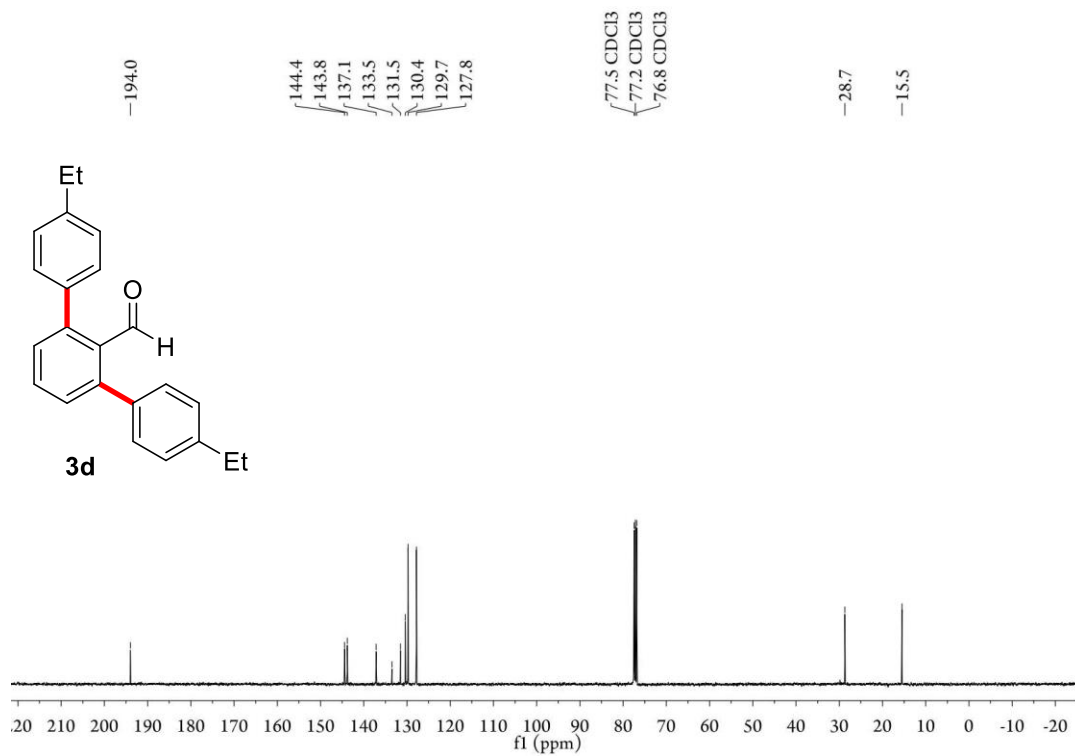

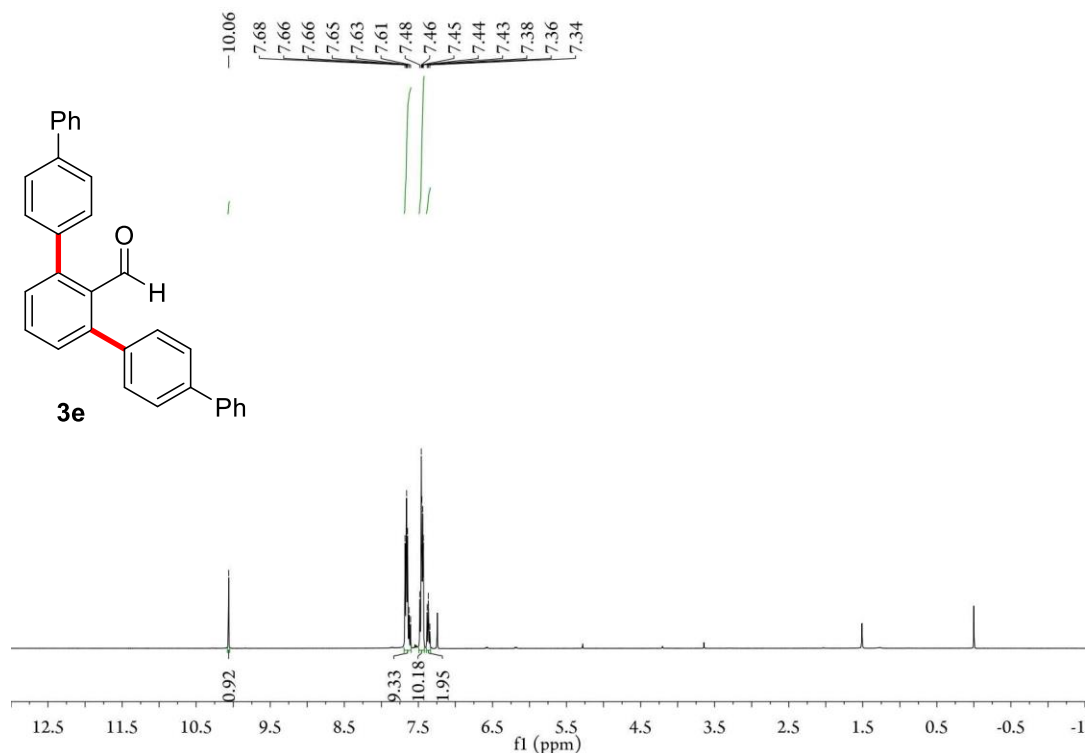

Figure S9.  $^1\text{H}$  NMR (400 MHz,  $\text{CDCl}_3$ ) Spectrum of Compound **3e**

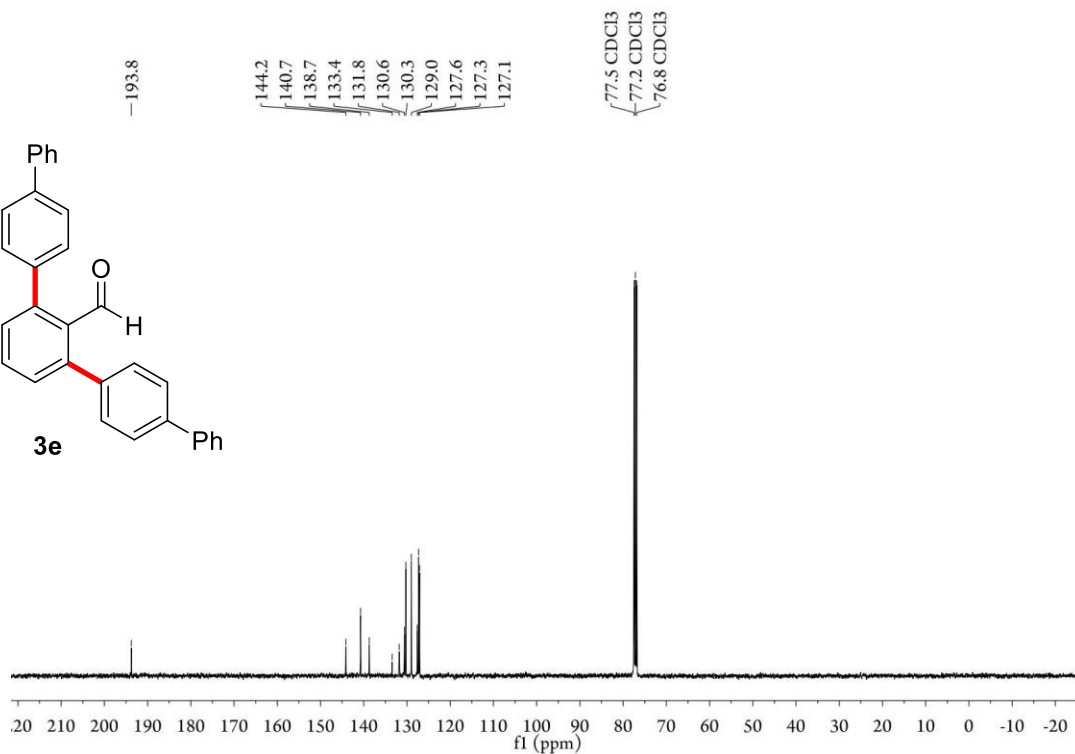

Figure S10.  $^{13}\text{C}$  NMR (100 MHz,  $\text{CDCl}_3$ ) Spectrum of Compound **3e**

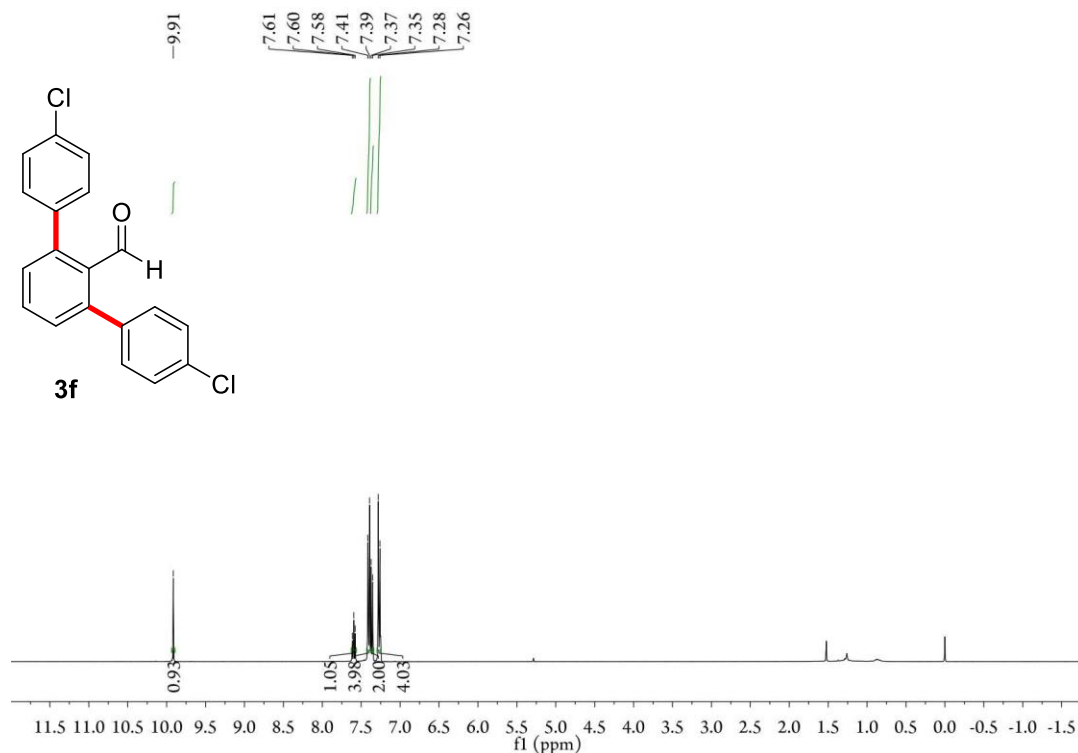

Figure S11.  $^1\text{H NMR}$  (400 MHz,  $\text{CDCl}_3$ ) Spectrum of Compound **3f**

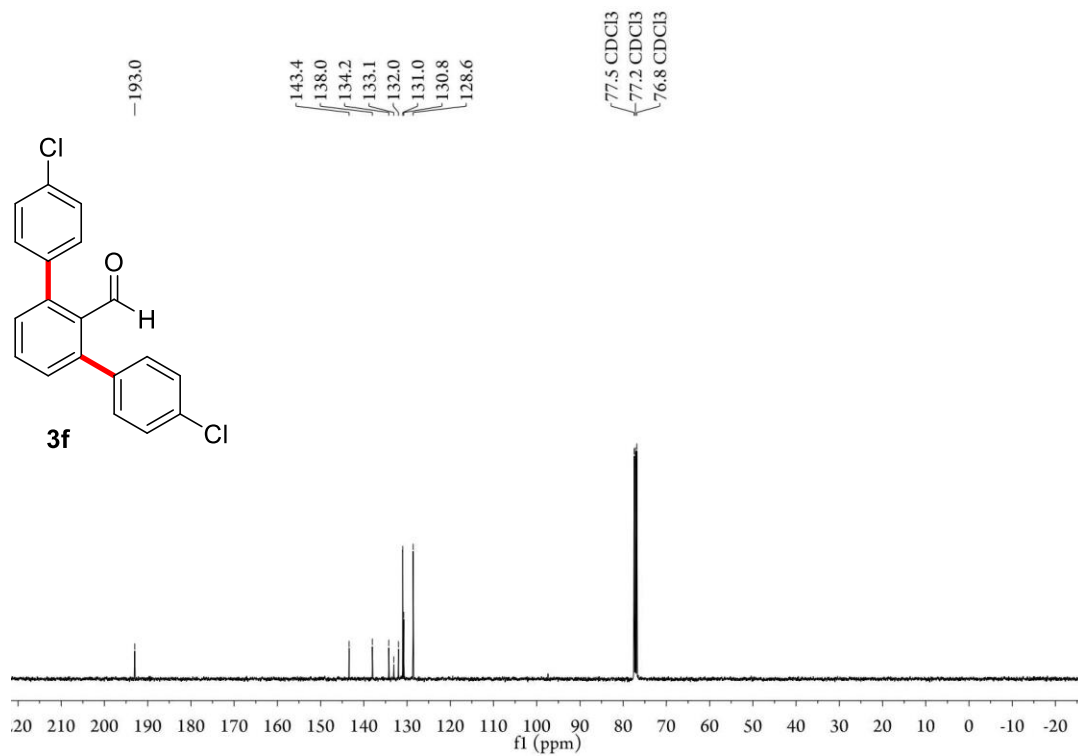

Figure S12.  $^{13}\text{C NMR}$  (100 MHz,  $\text{CDCl}_3$ ) Spectrum of Compound **3f**

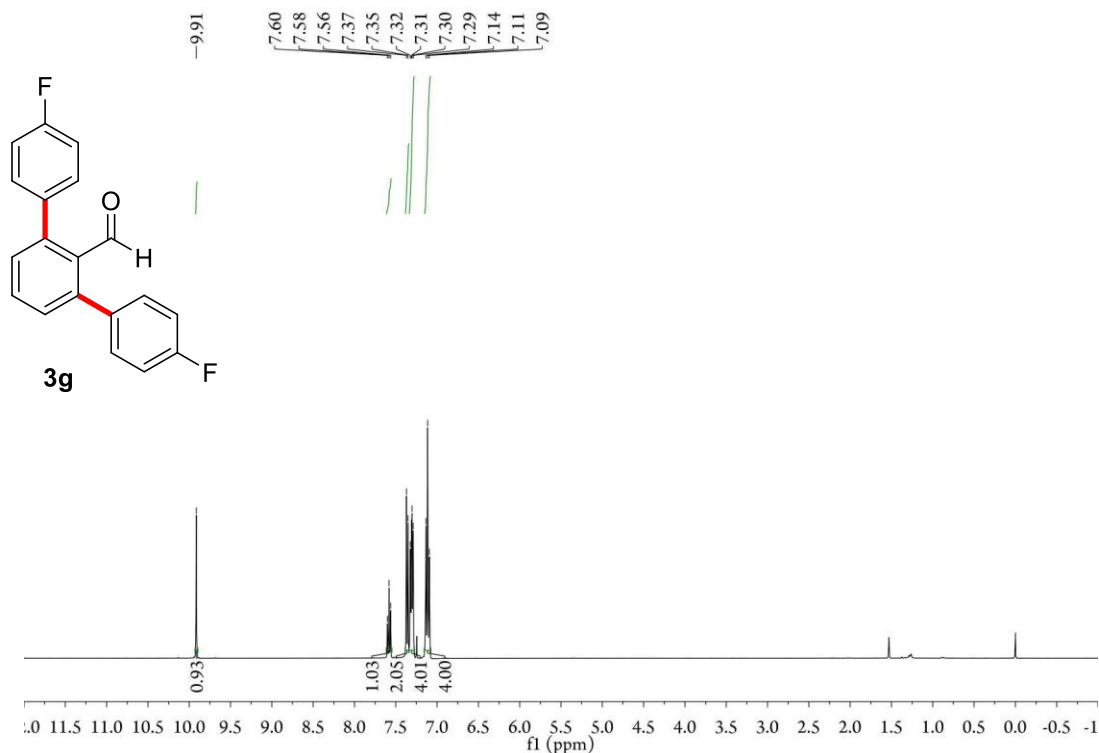

Figure S13. <sup>1</sup>H NMR (400 MHz, CDCl<sub>3</sub>) Spectrum of Compound **3g**

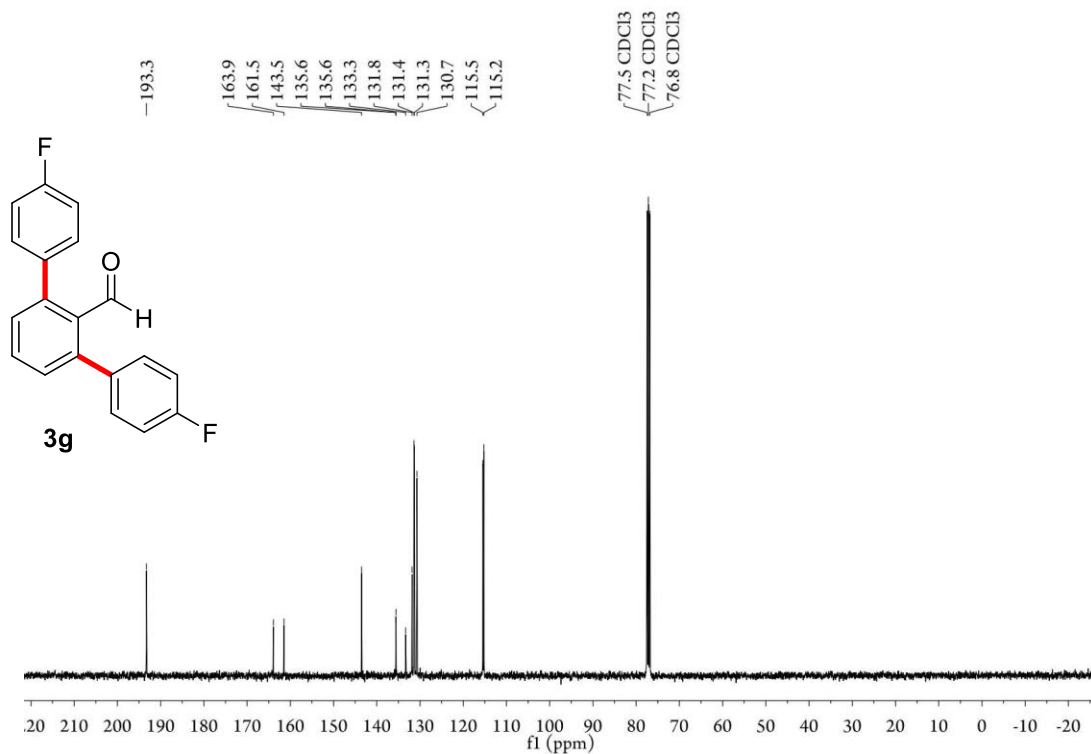

Figure S14. <sup>13</sup>C NMR (100 MHz, CDCl<sub>3</sub>) Spectrum of Compound **3g**

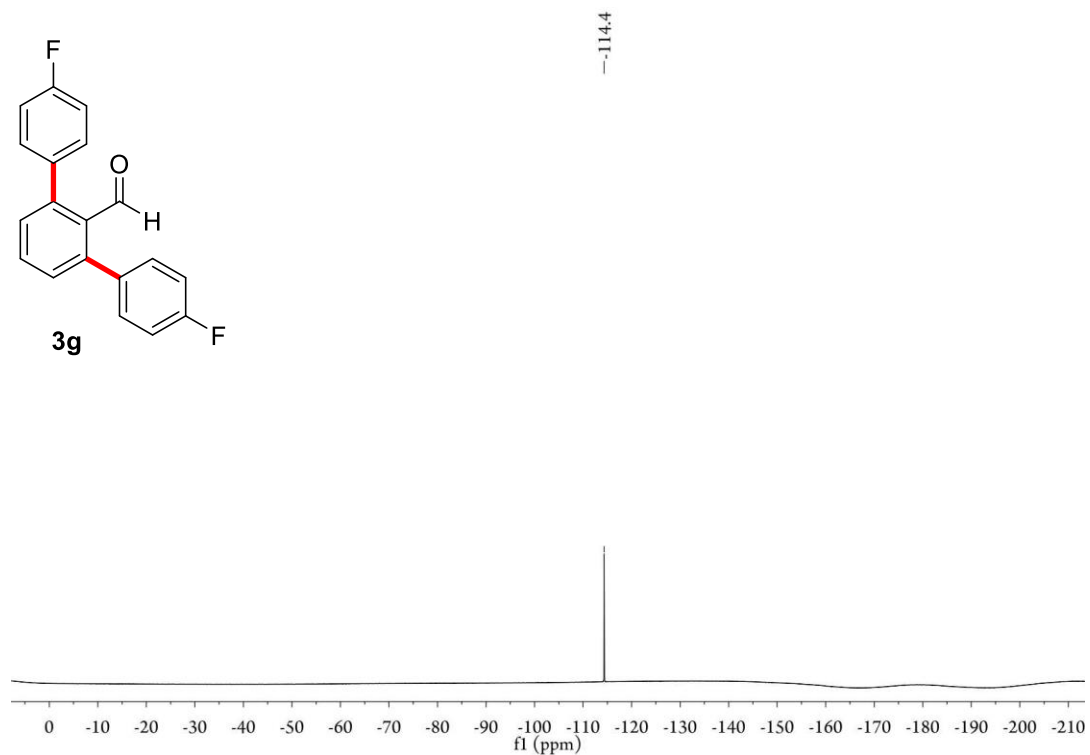

Figure S15.  $^{19}\text{F}$  NMR (376 MHz,  $\text{CDCl}_3$ ) Spectrum of Compound **3g**

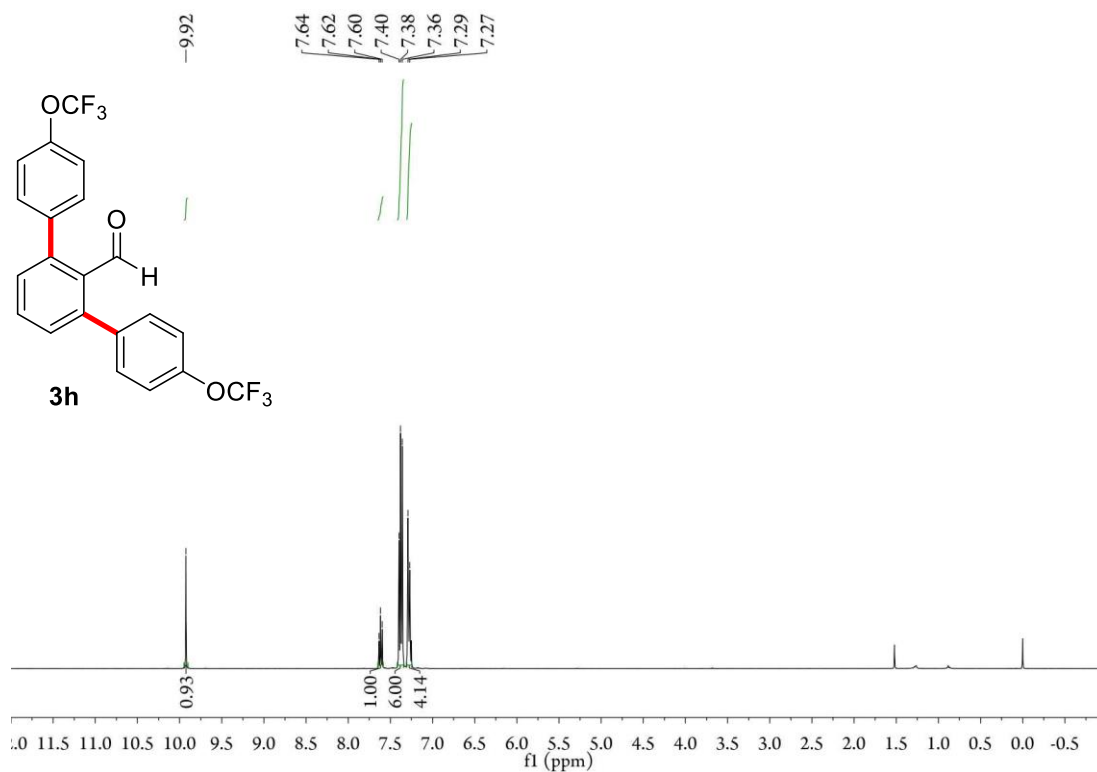

Figure S16. <sup>1</sup>H NMR (400 MHz, CDCl<sub>3</sub>) Spectrum of Compound **3h**

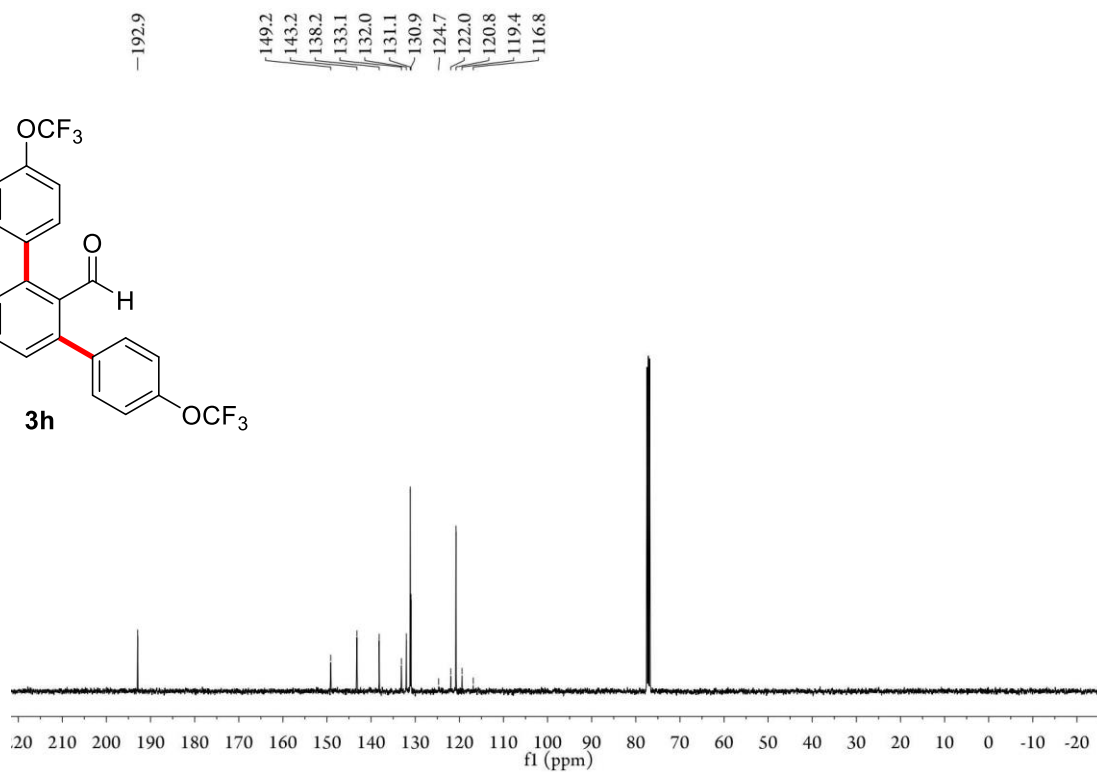

Figure S17. <sup>13</sup>C NMR (100 MHz, CDCl<sub>3</sub>) Spectrum of Compound **3h**

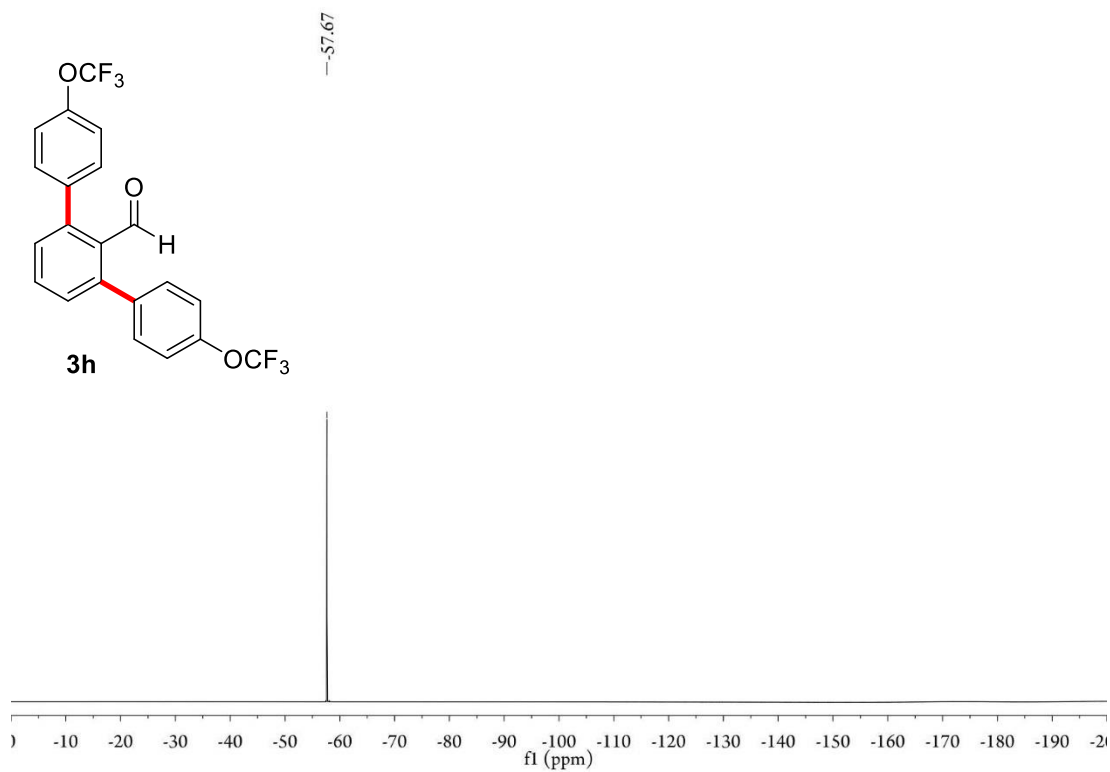

Figure S18.  $^{19}\text{F}$  NMR (376 MHz,  $\text{CDCl}_3$ ) Spectrum of Compound **3h**

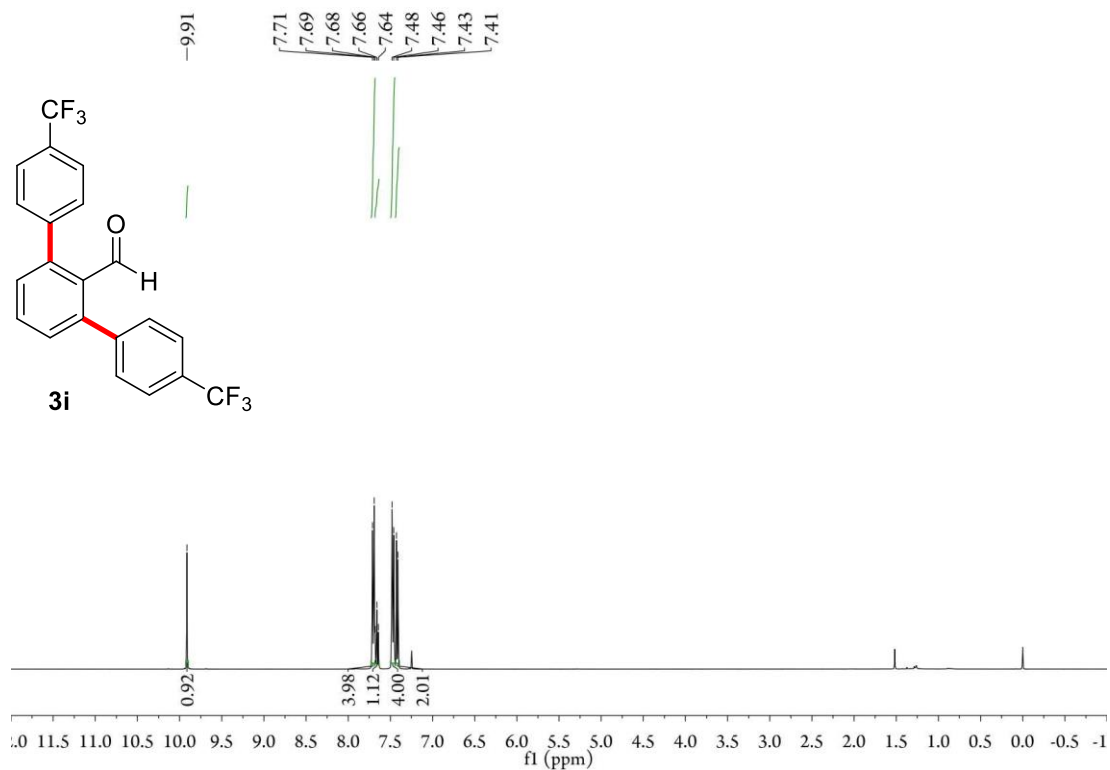

Figure S19. <sup>1</sup>H NMR (400 MHz, CDCl<sub>3</sub>) Spectrum of Compound **3i**

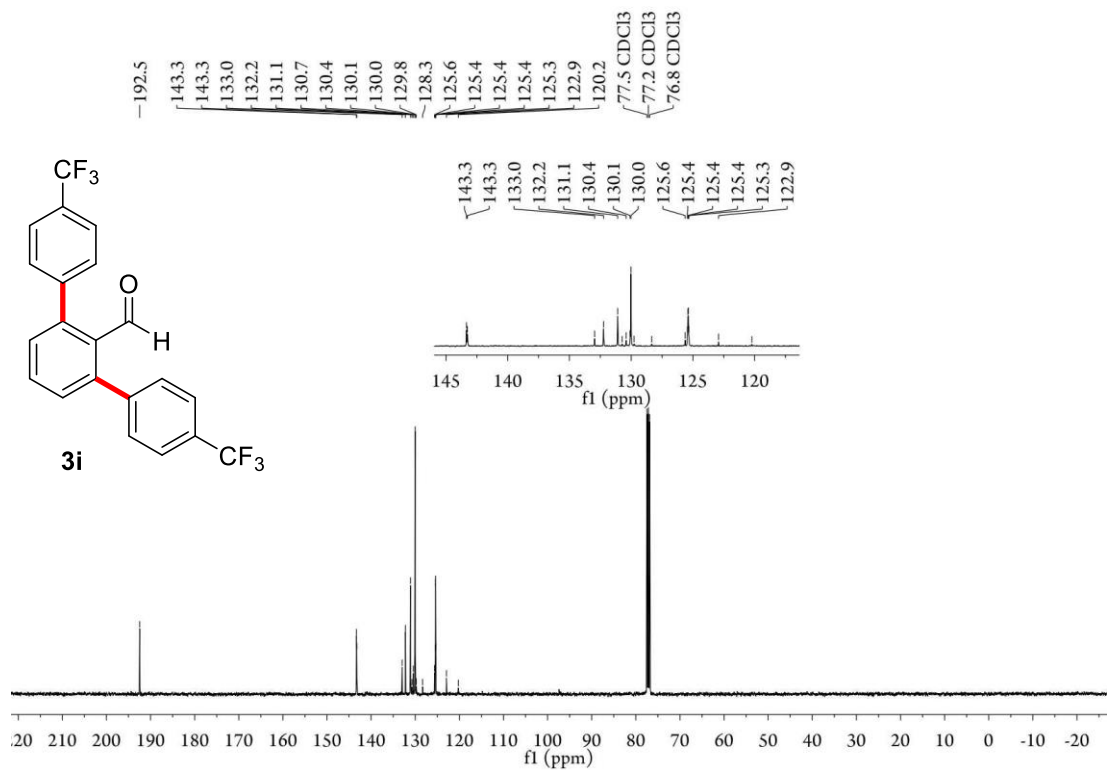

Figure S20. <sup>13</sup>C NMR (100 MHz, CDCl<sub>3</sub>) Spectrum of Compound **3i**



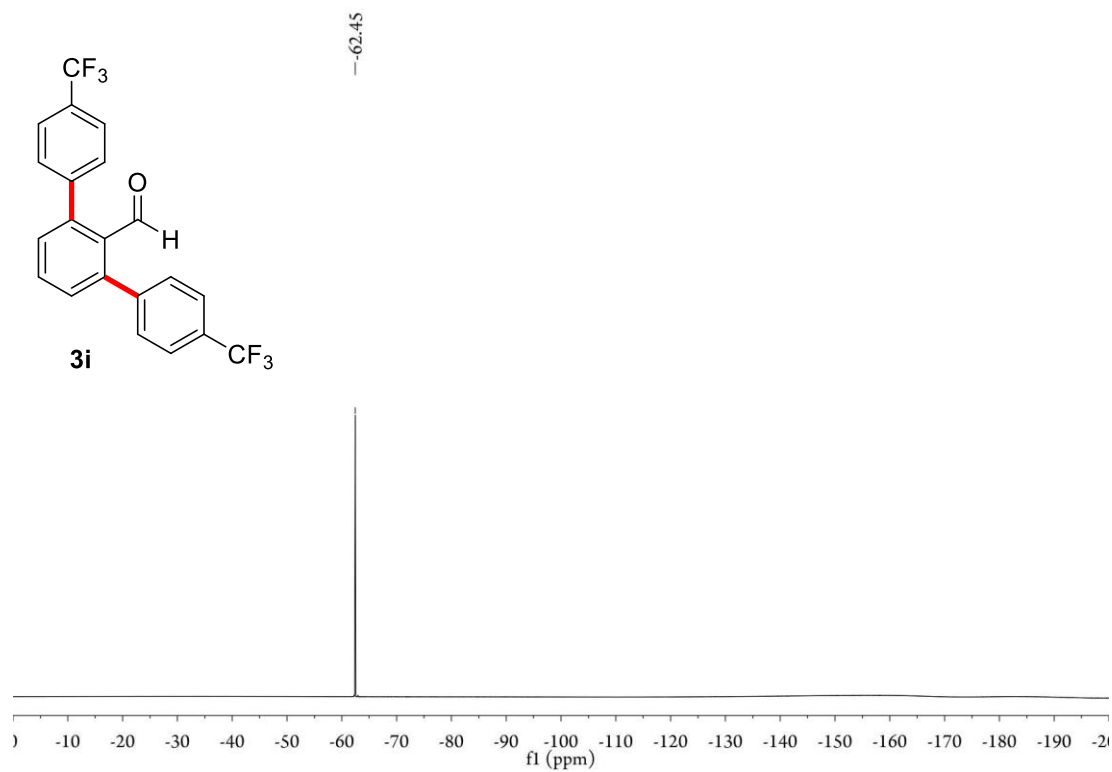

Figure S21.  $^{19}\text{F}$  NMR (376 MHz,  $\text{CDCl}_3$ ) Spectrum of Compound **3i**

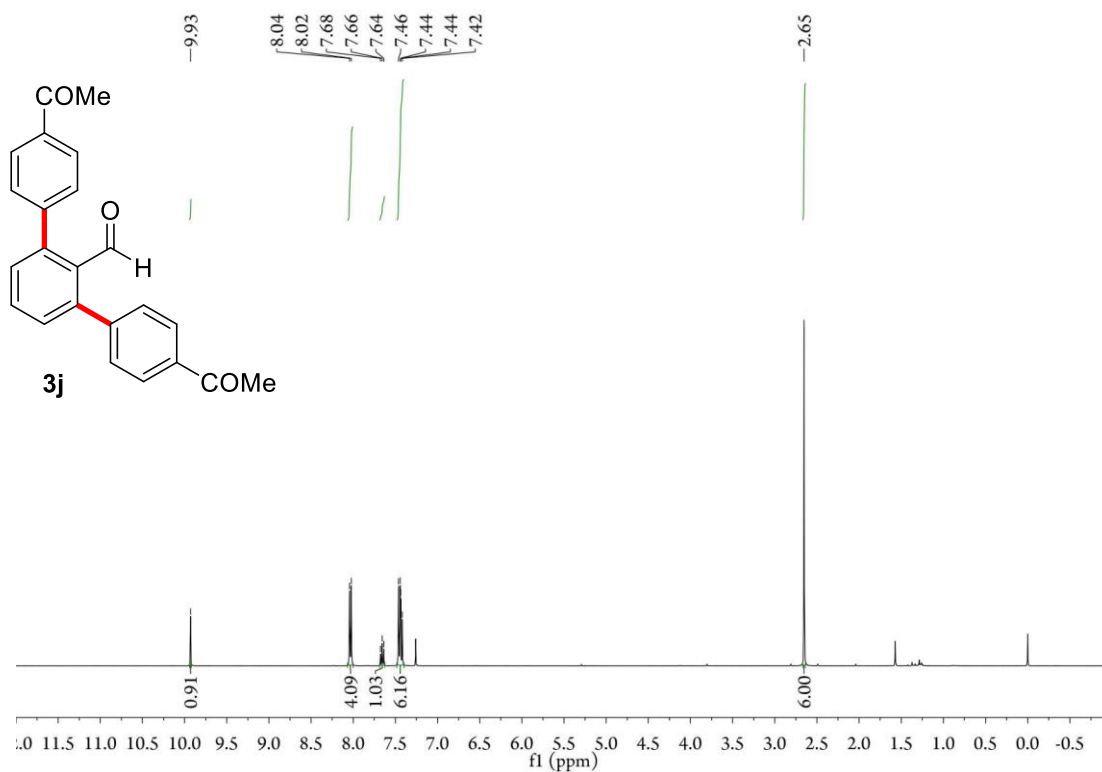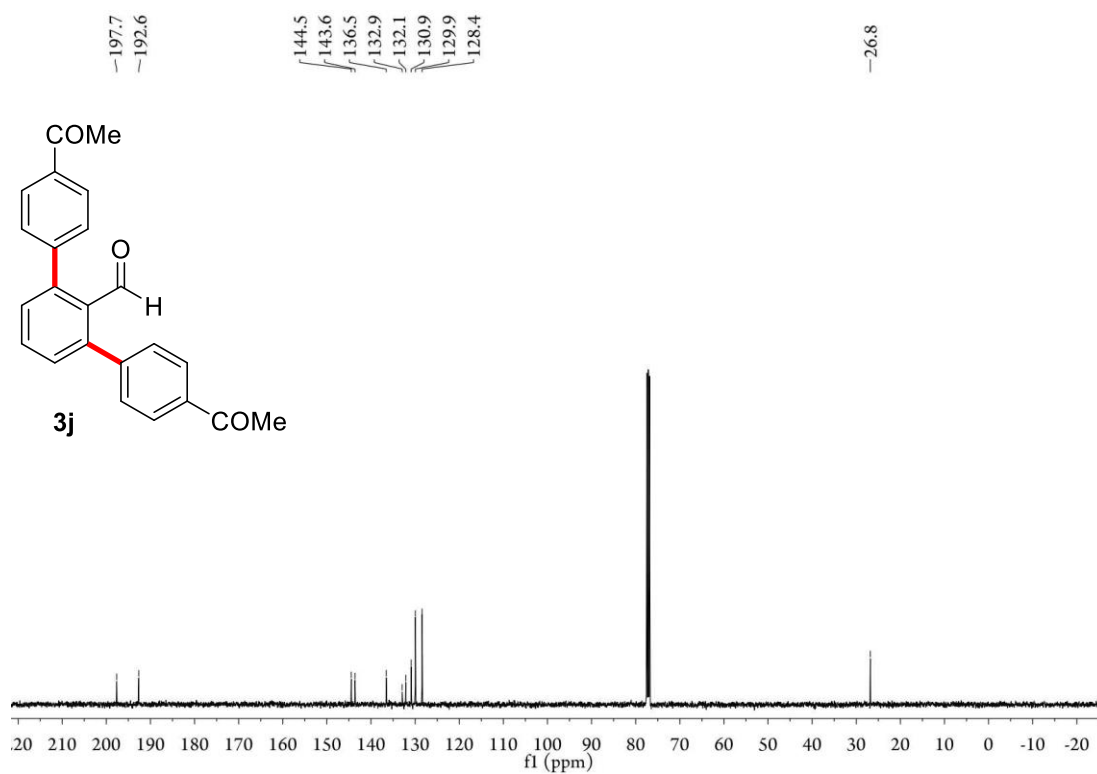

Figure S23. <sup>13</sup>C NMR (100 MHz, CDCl<sub>3</sub>) Spectrum of Compound **3j**

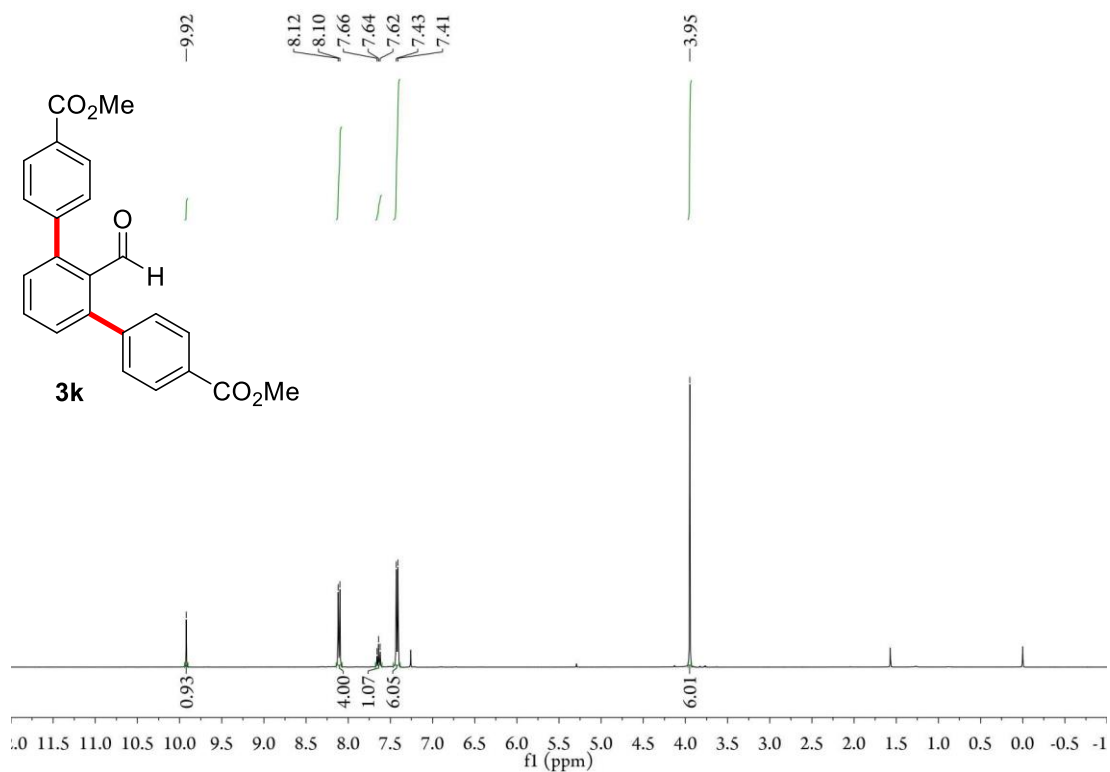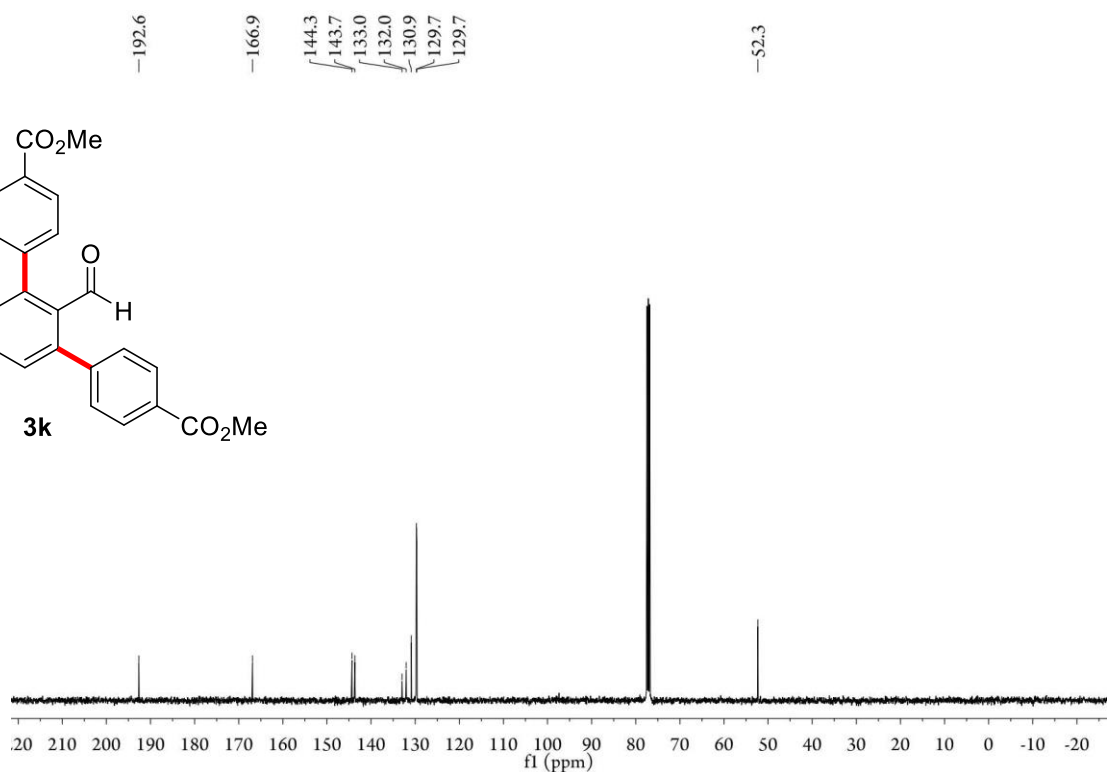

Figure S25. <sup>13</sup>C NMR (100 MHz, CDCl<sub>3</sub>) Spectrum of Compound **3k**

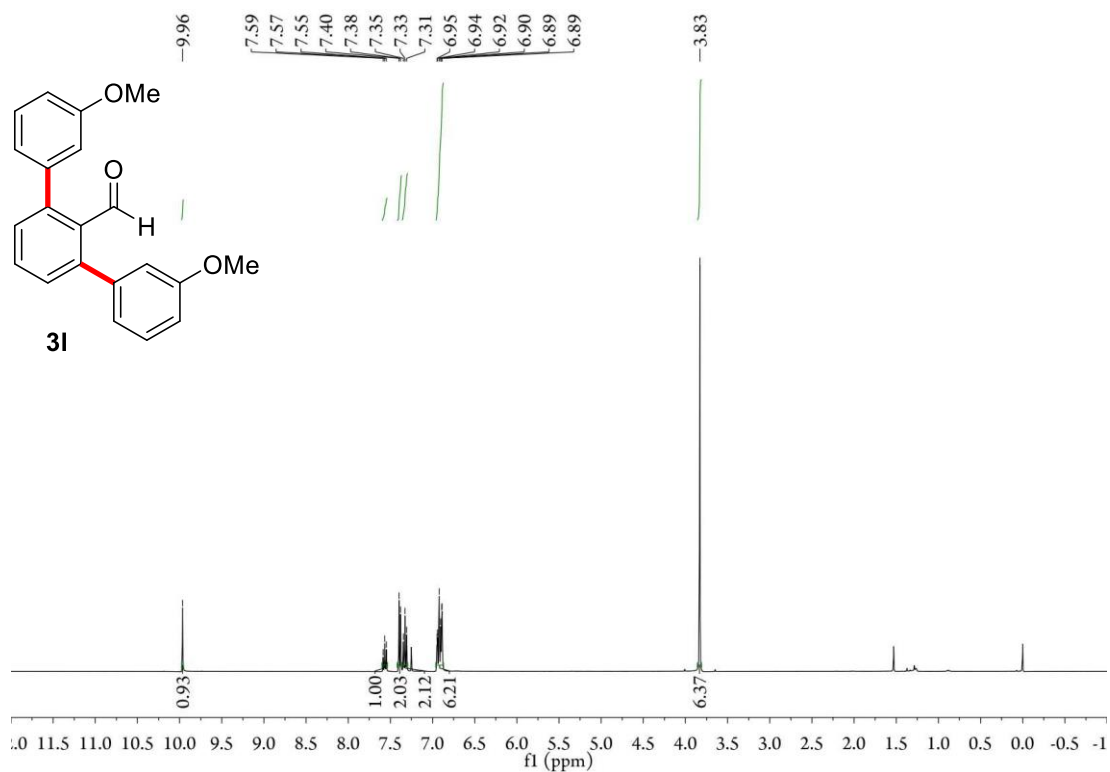

Figure S26. <sup>1</sup>H NMR (400 MHz, CDCl<sub>3</sub>) Spectrum of Compound **3I**

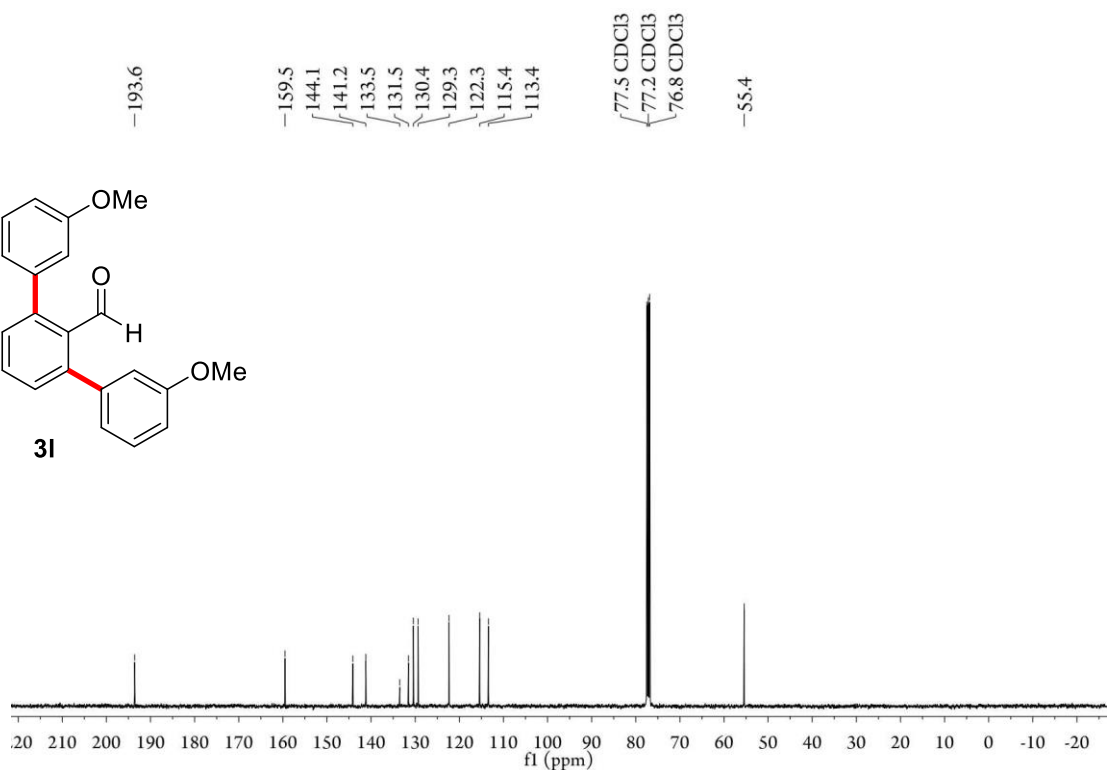

Figure S27. <sup>13</sup>C NMR (100 MHz, CDCl<sub>3</sub>) Spectrum of Compound **3I**

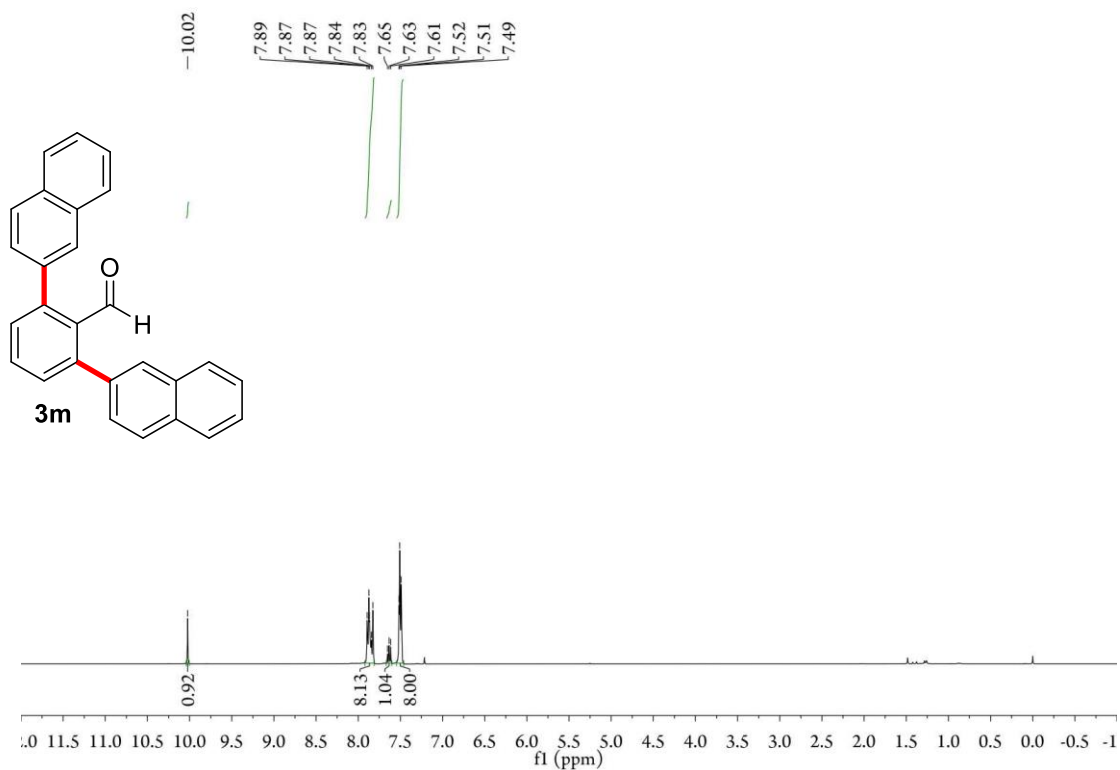

Figure S28. <sup>1</sup>H NMR (400 MHz, CDCl<sub>3</sub>) Spectrum of Compound **3m**

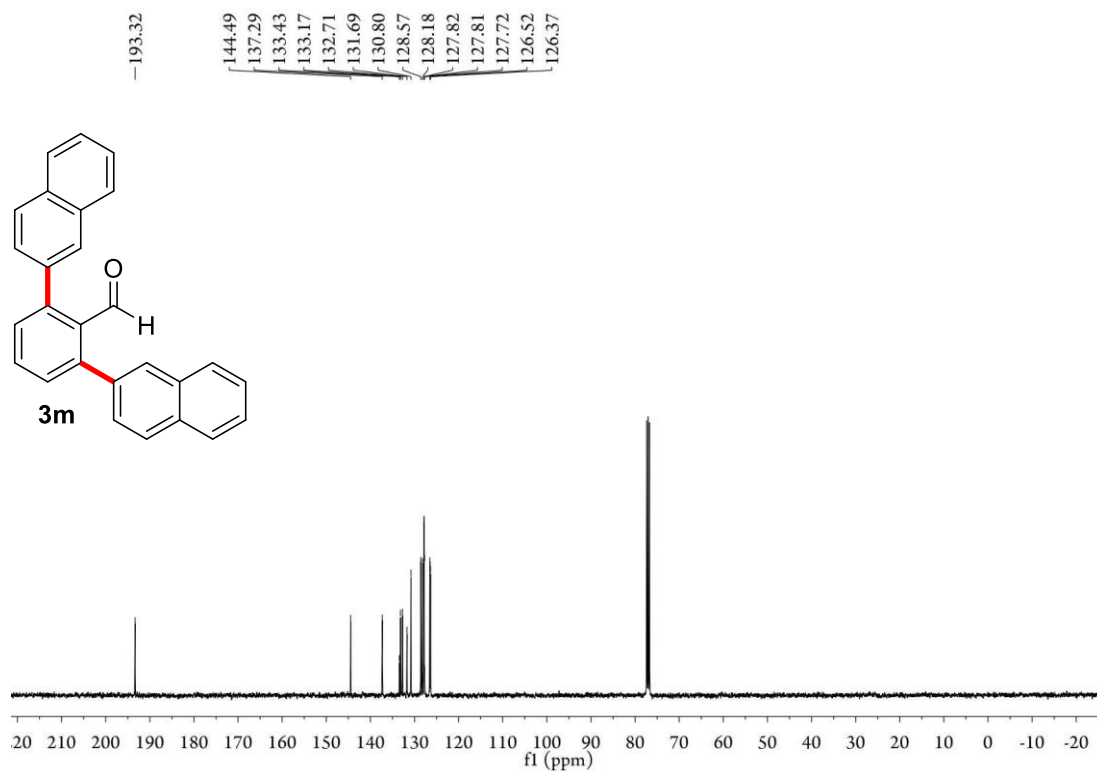

Figure S29. <sup>13</sup>C NMR (100 MHz, CDCl<sub>3</sub>) Spectrum of Compound **3m**

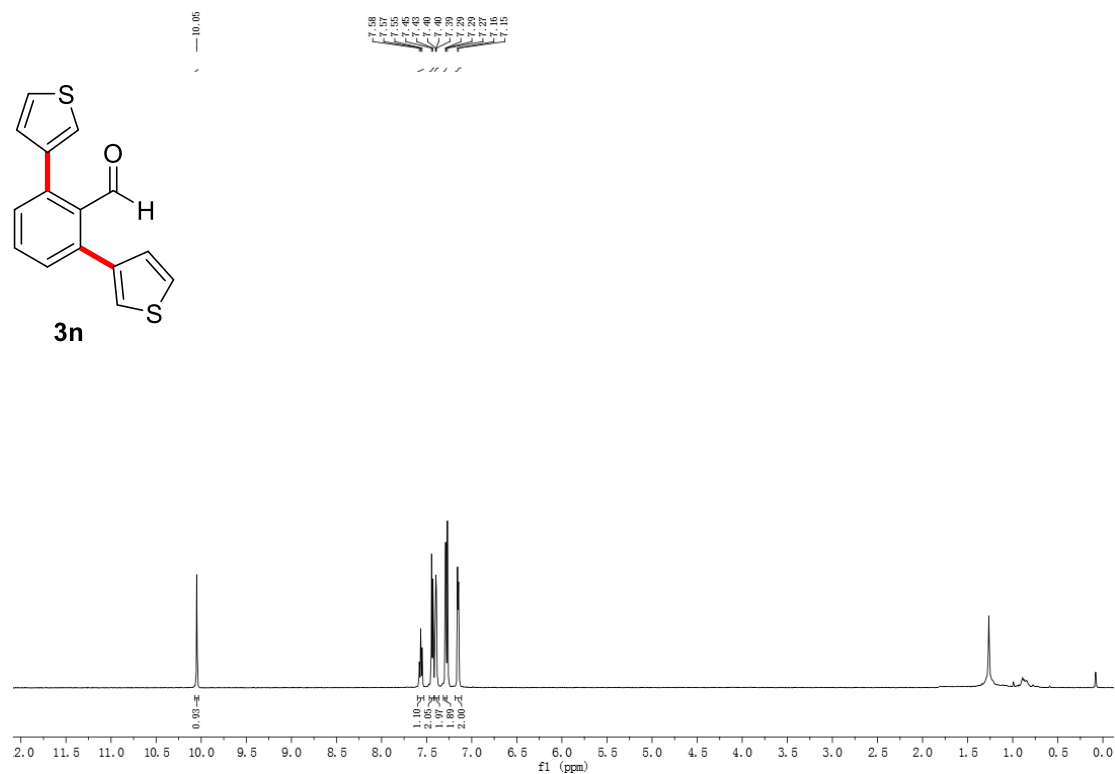

Figure S30. <sup>1</sup>H NMR (400 MHz, CDCl<sub>3</sub>) Spectrum of Compound **3n**

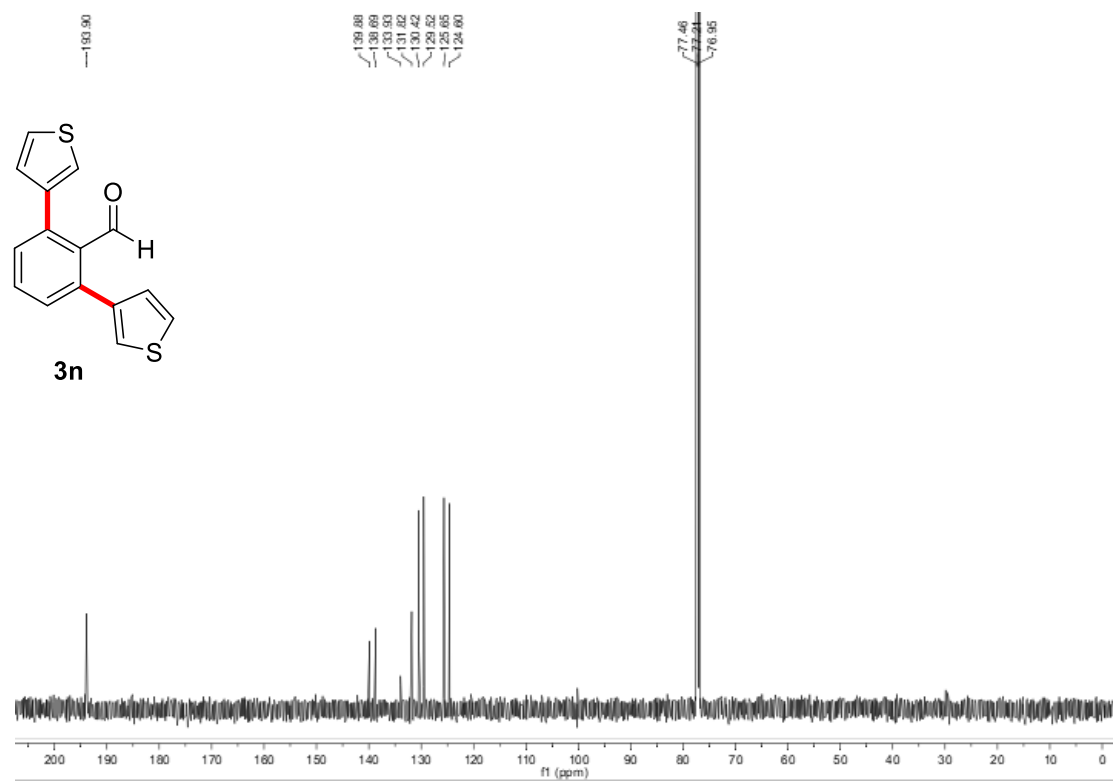

Figure S31. <sup>13</sup>C NMR (100 MHz, CDCl<sub>3</sub>) Spectrum of Compound **3n**

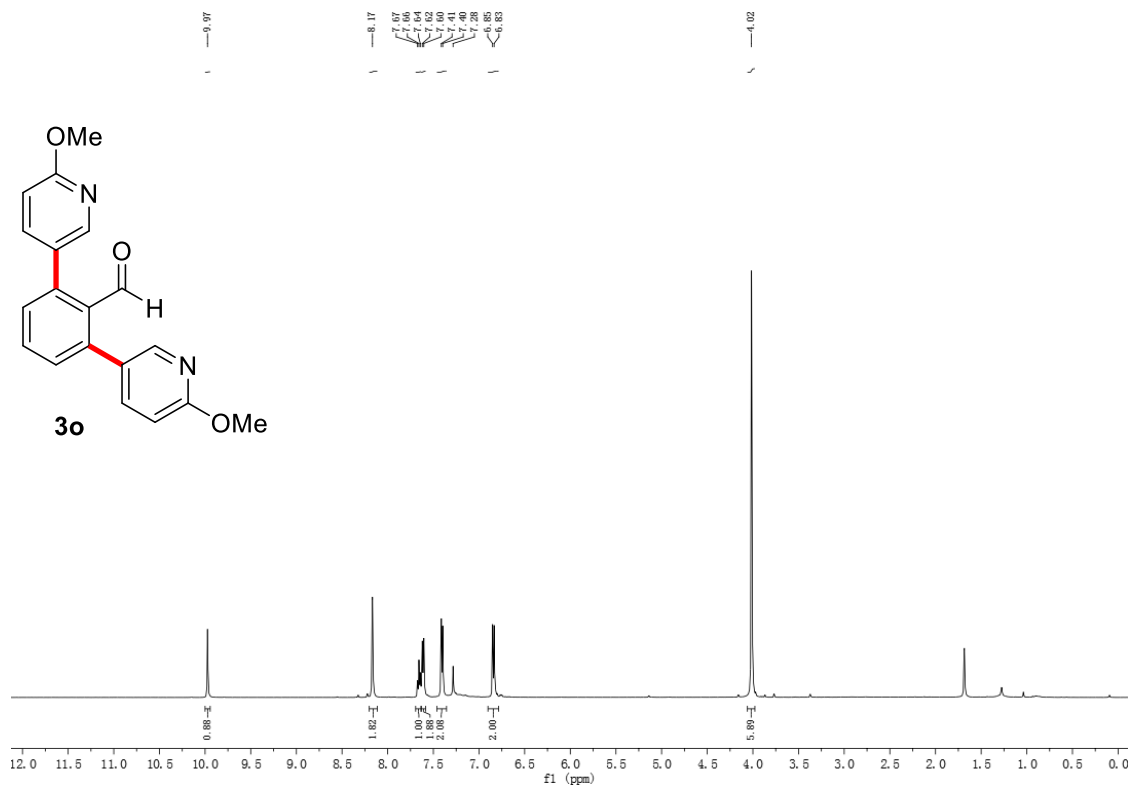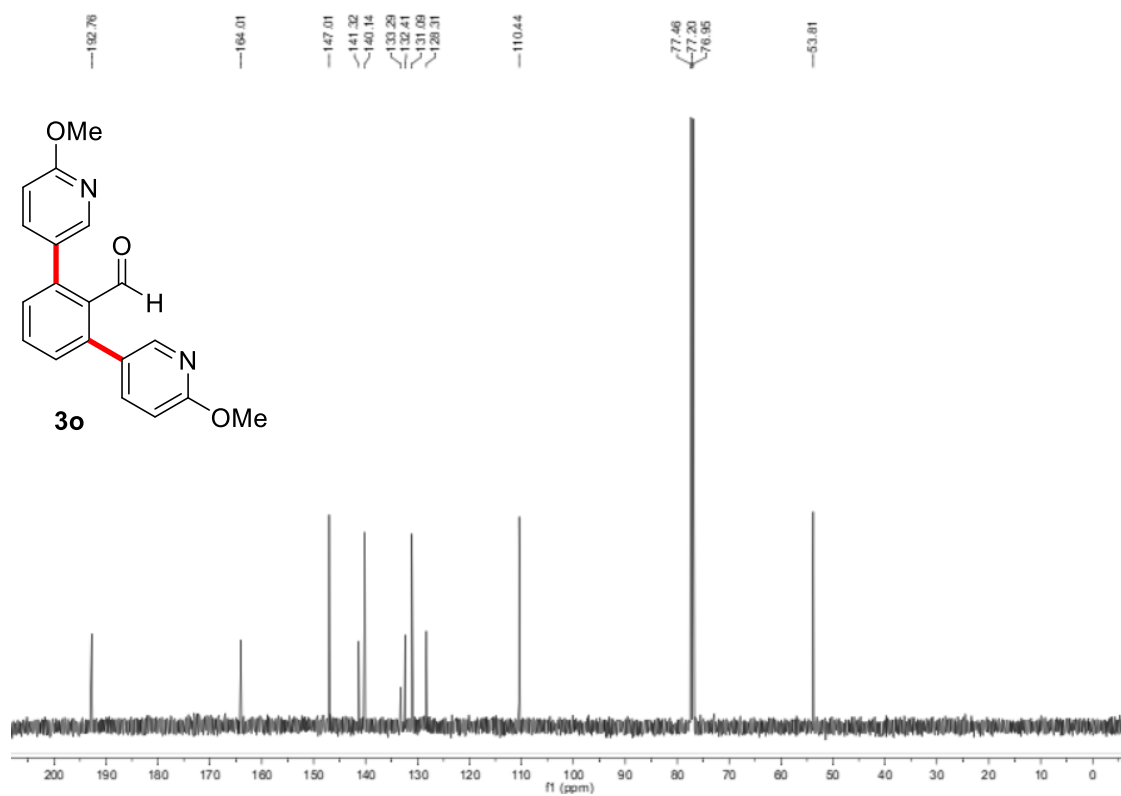

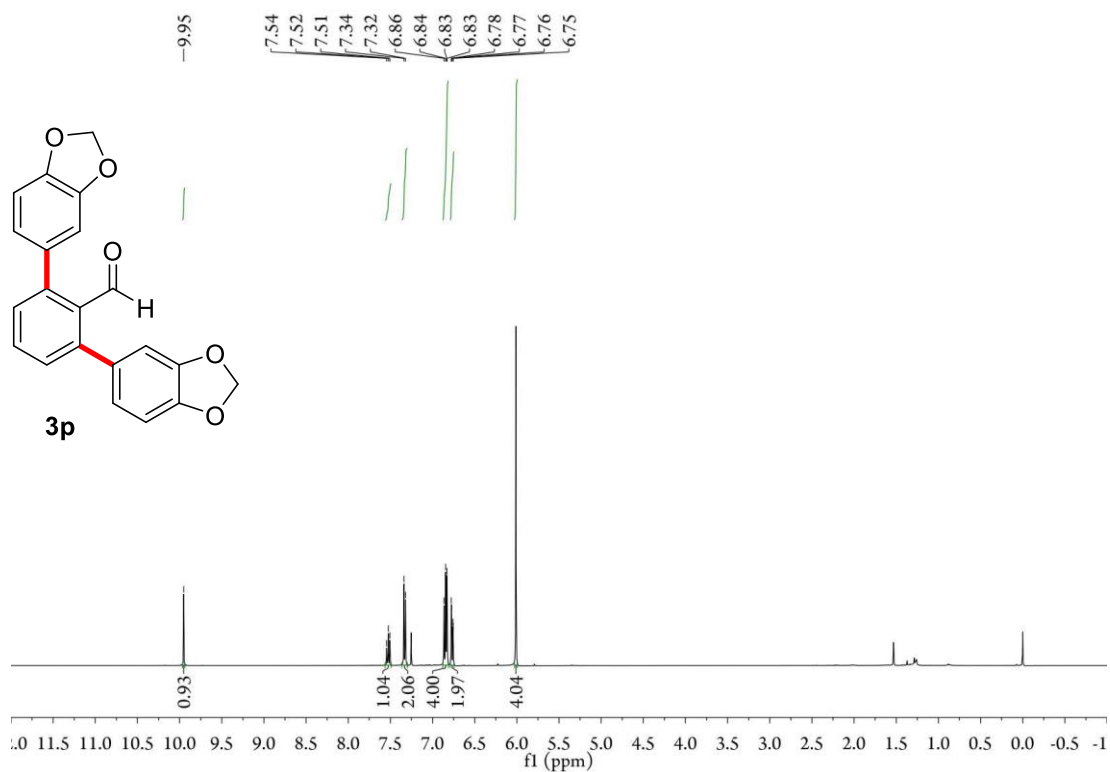

Figure S34. <sup>1</sup>H NMR (400 MHz, CDCl<sub>3</sub>) Spectrum of Compound **3p**

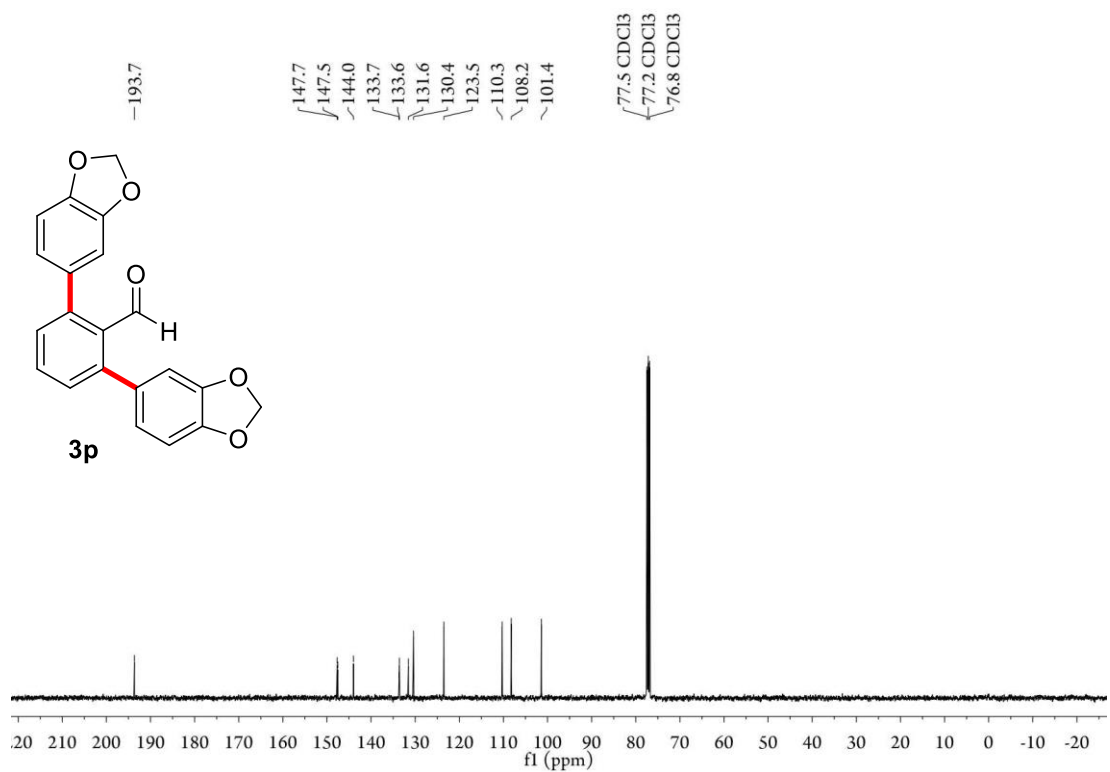

Figure S35. <sup>13</sup>C NMR (100 MHz, CDCl<sub>3</sub>) Spectrum of Compound **3p**



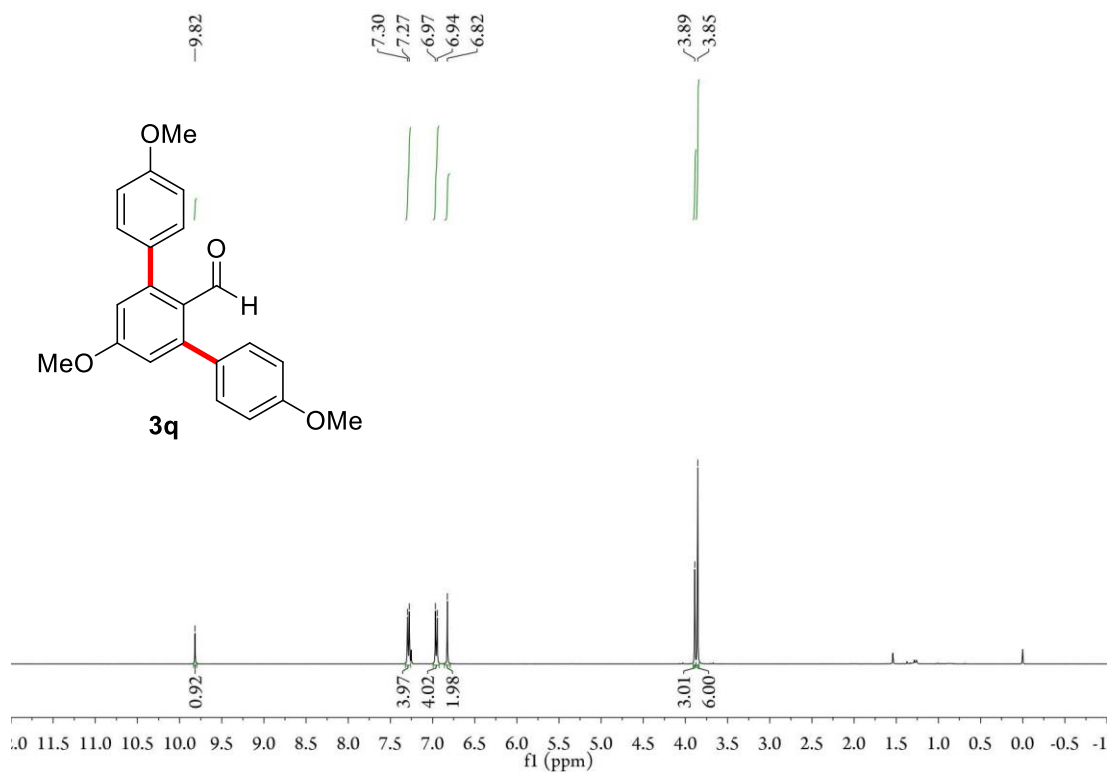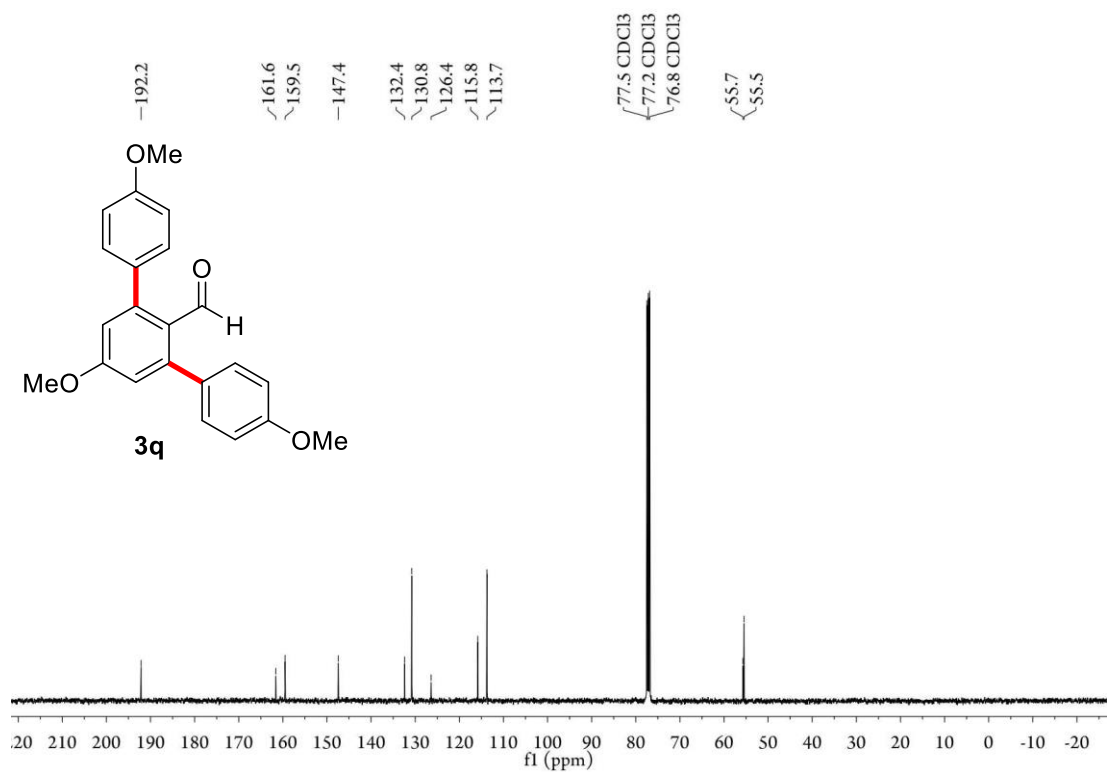

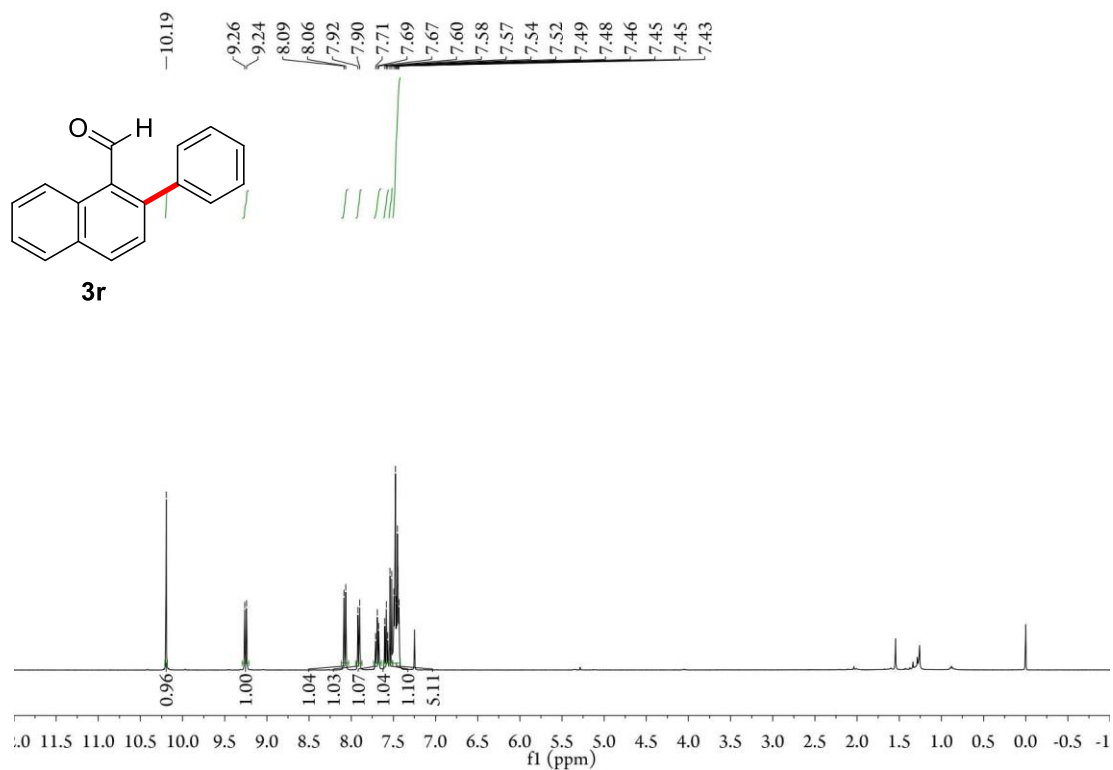

Figure S38. <sup>1</sup>H NMR (400 MHz, CDCl<sub>3</sub>) Spectrum of Compound **3r**

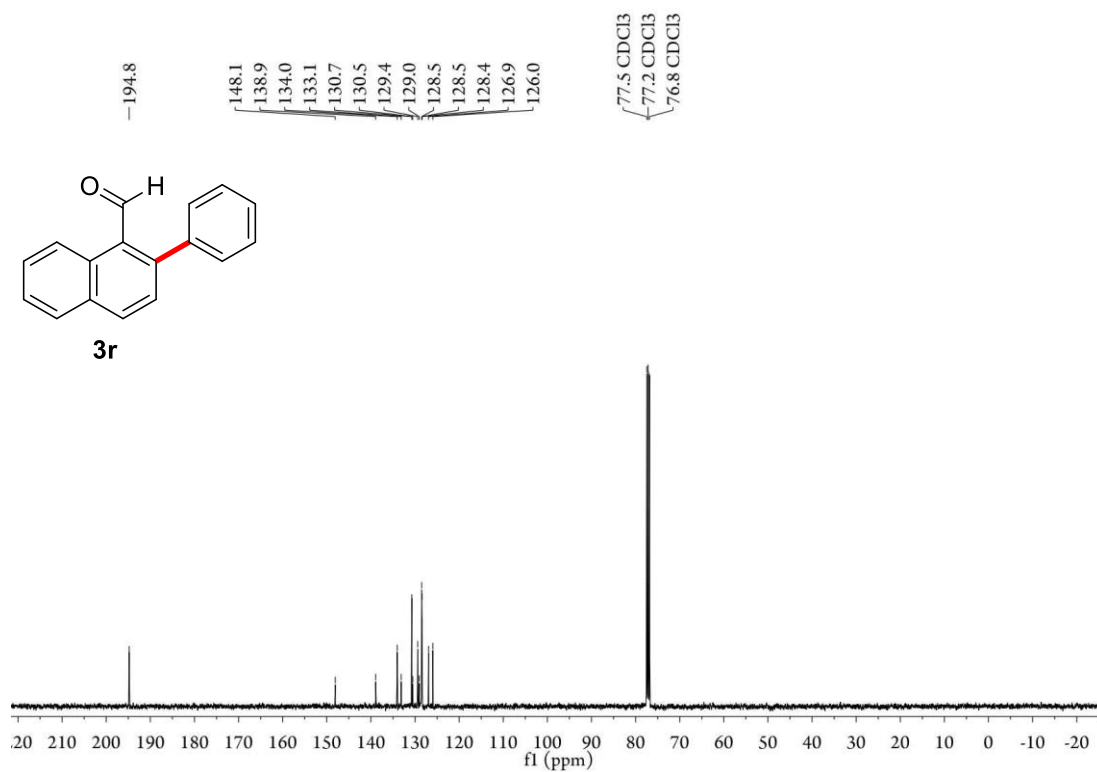

Figure S39. <sup>13</sup>C NMR (100 MHz, CDCl<sub>3</sub>) Spectrum of Compound **3r**

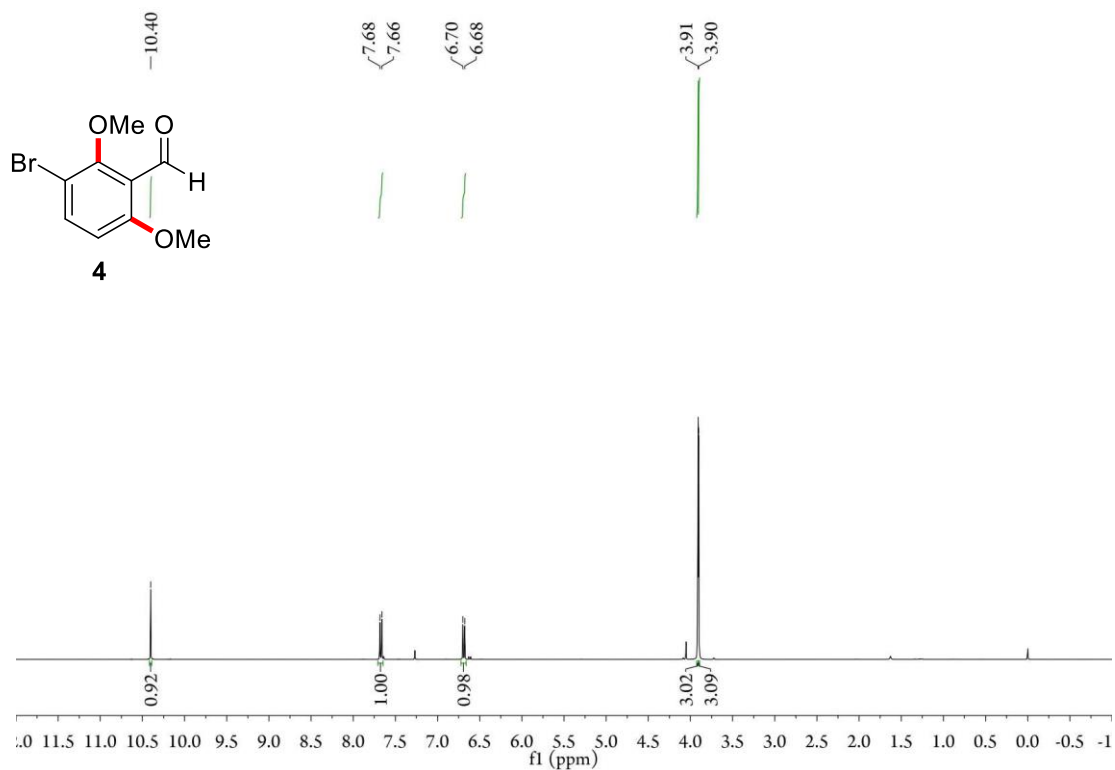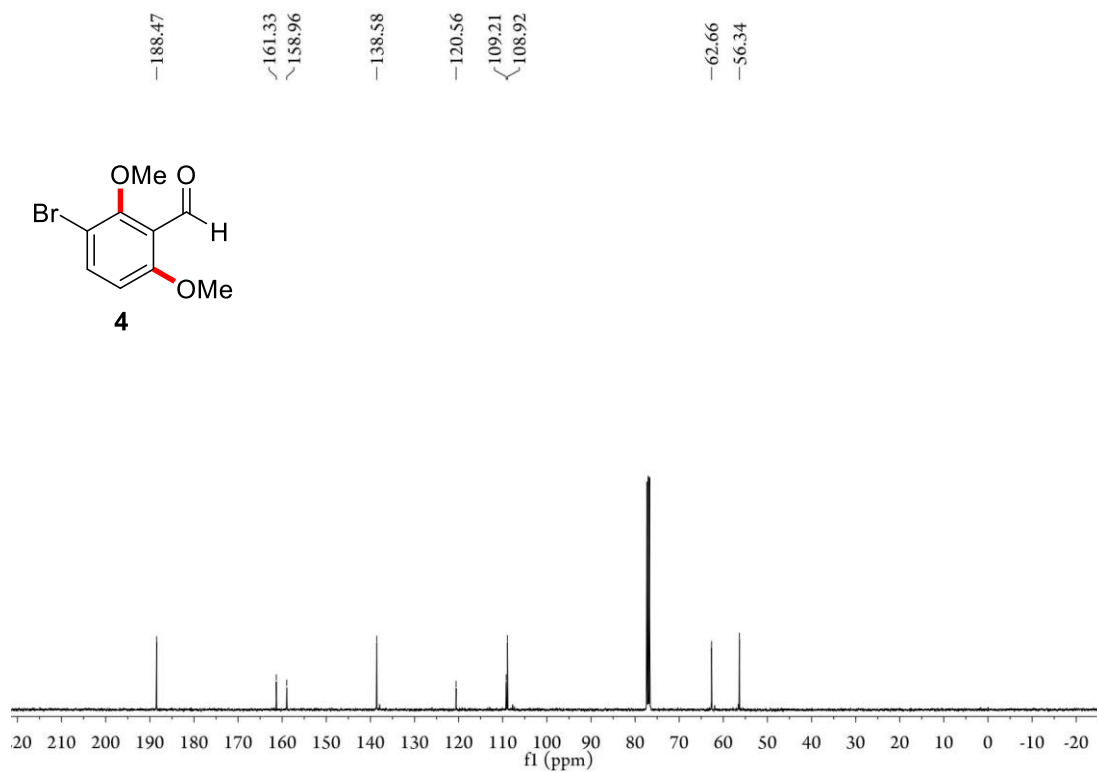

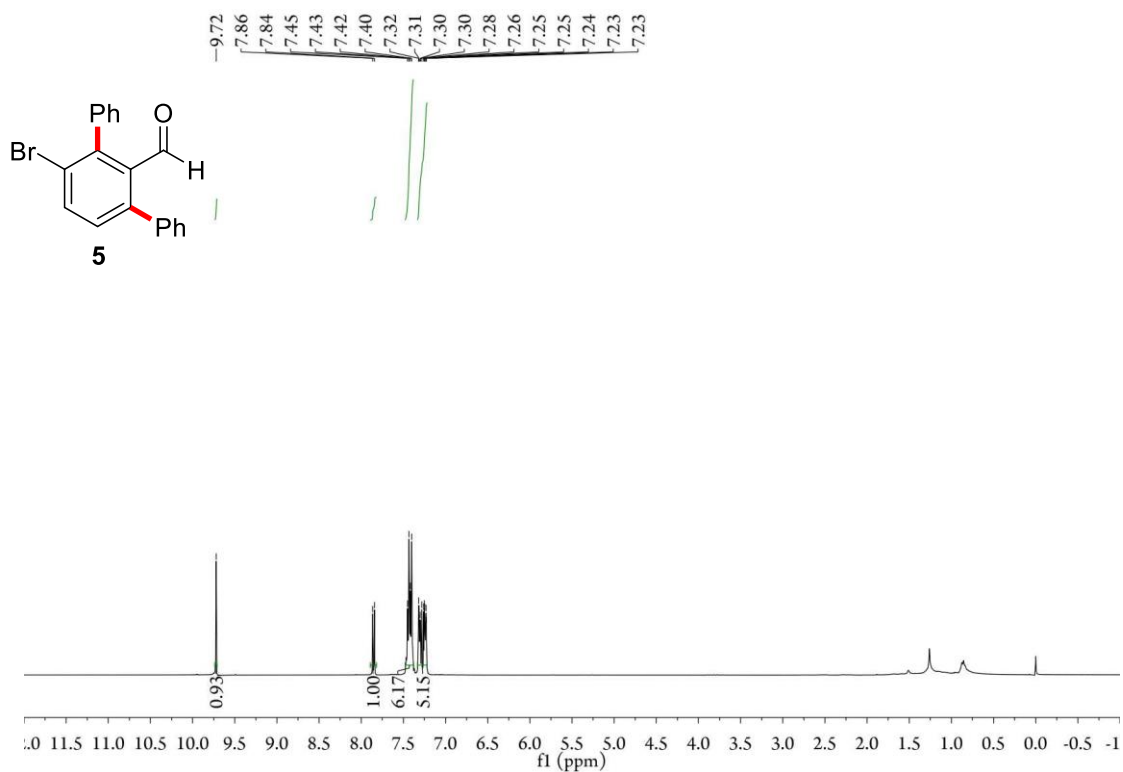

Figure S42.  $^1\text{H NMR}$  (400 MHz,  $\text{CDCl}_3$ ) Spectrum of Compound **5**

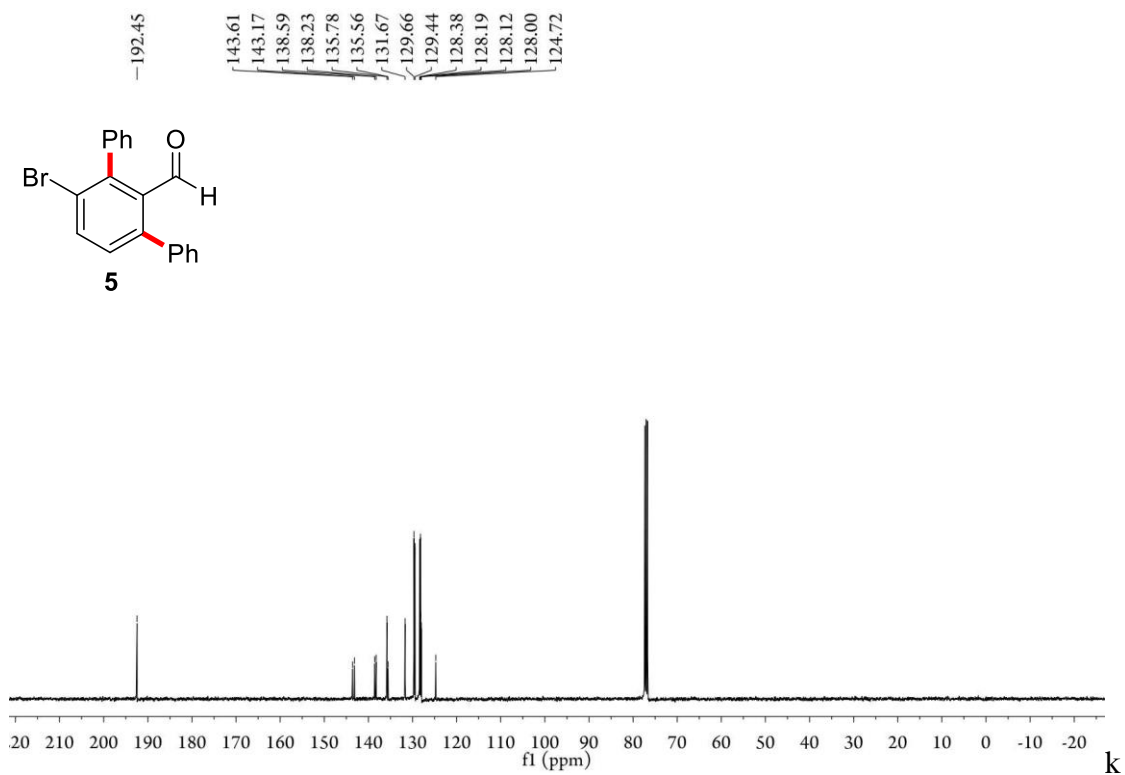

Figure S43.  $^{13}\text{C NMR}$  (100 MHz,  $\text{CDCl}_3$ ) Spectrum of Compound **5**

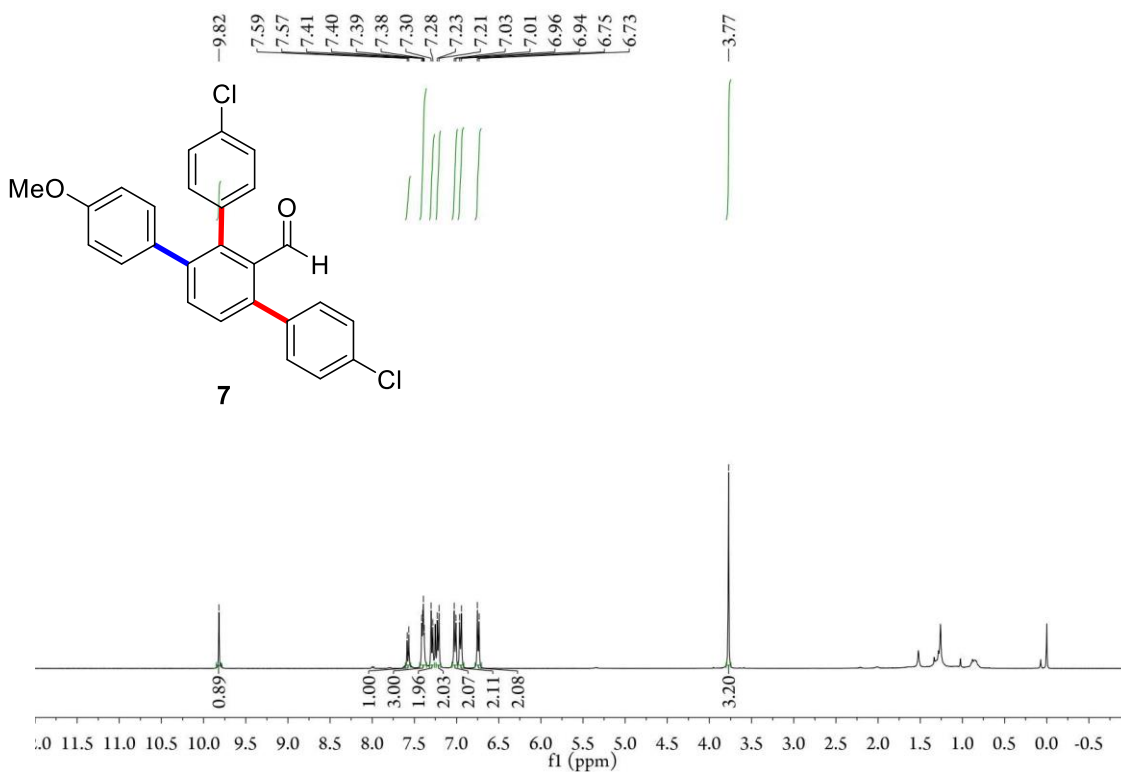

Figure S44. <sup>1</sup>H NMR (400 MHz, CDCl<sub>3</sub>) Spectrum of Compound 7

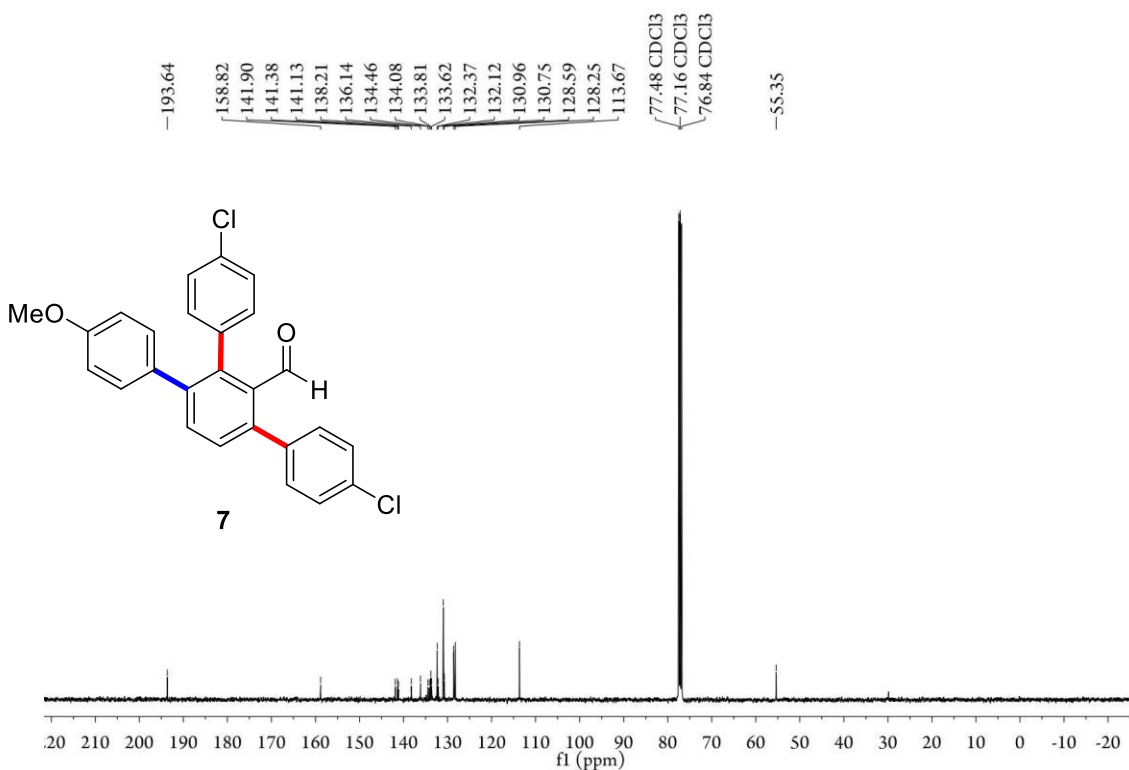

Figure S45. <sup>13</sup>C NMR (100 MHz, CDCl<sub>3</sub>) Spectrum of Compound 7

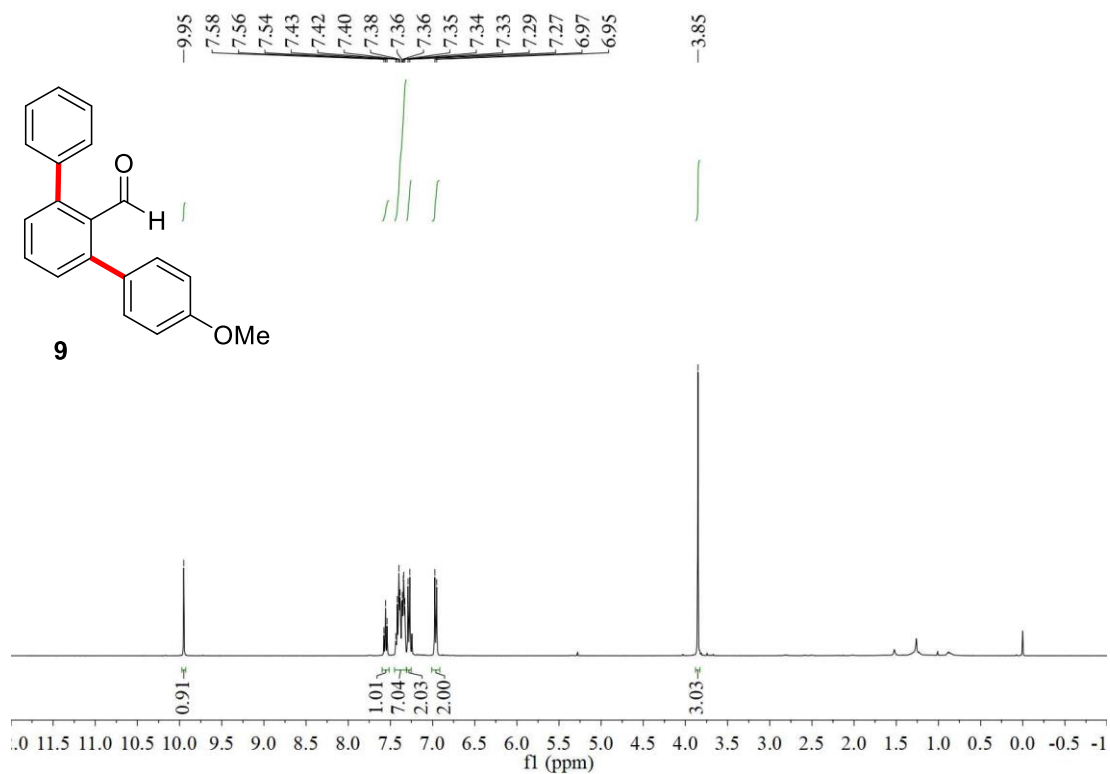

Figure S46. <sup>1</sup>H NMR (400 MHz, CDCl<sub>3</sub>) Spectrum of Compound **9**

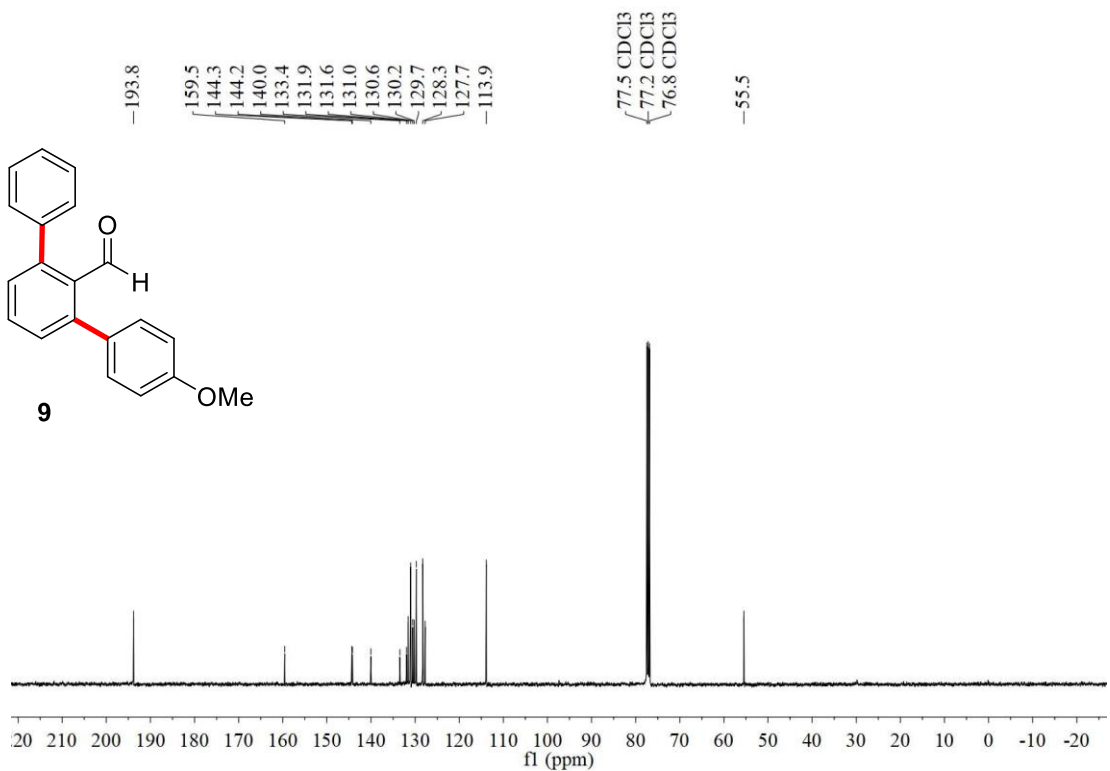

Figure S47. <sup>13</sup>C NMR (100 MHz, CDCl<sub>3</sub>) Spectrum of Compound **9**

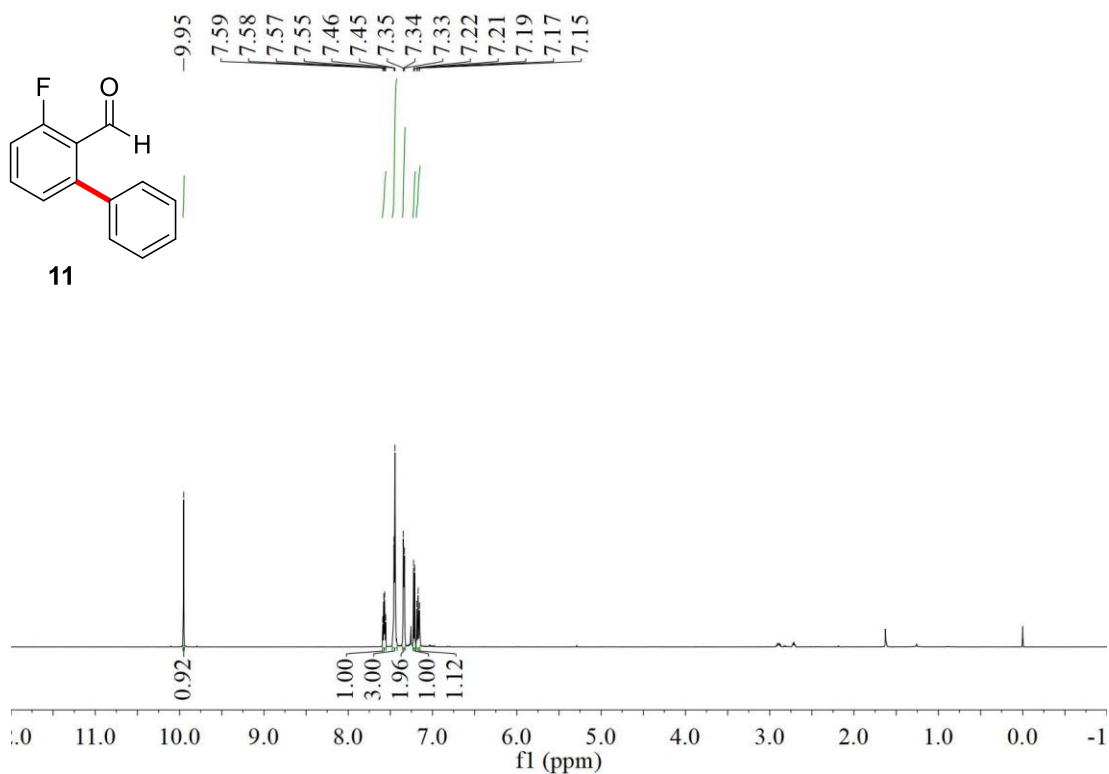

Figure S48. <sup>1</sup>H NMR (600 MHz, CDCl<sub>3</sub>) Spectrum of Compound **11**

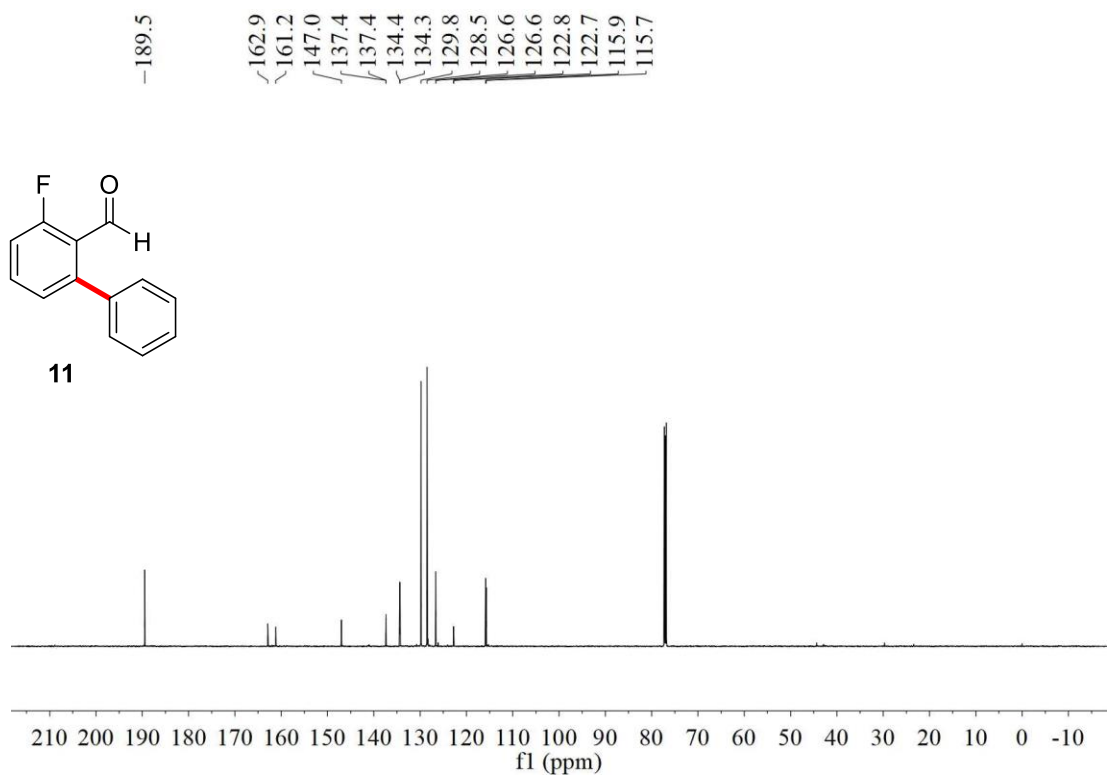

Figure S49. <sup>13</sup>C NMR (150 MHz, CDCl<sub>3</sub>) Spectrum of Compound **11**

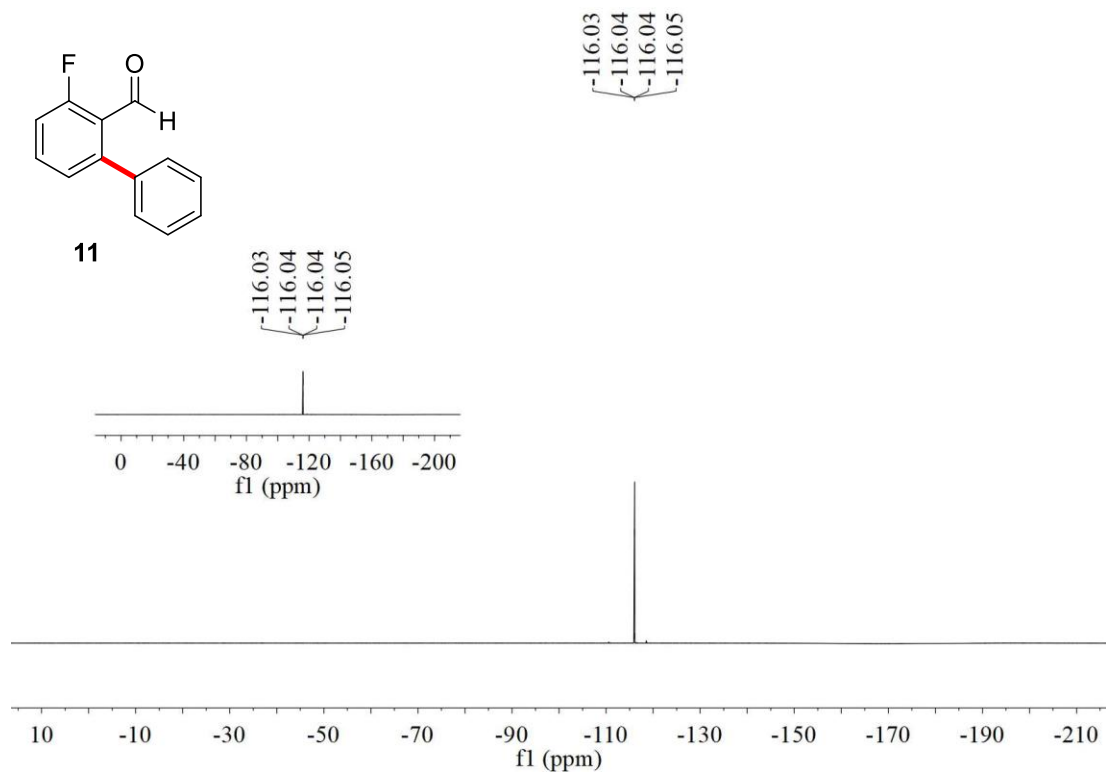

Figure S50.  $^{19}\text{F}$  NMR (565 MHz,  $\text{CDCl}_3$ ) Spectrum of Compound **11**



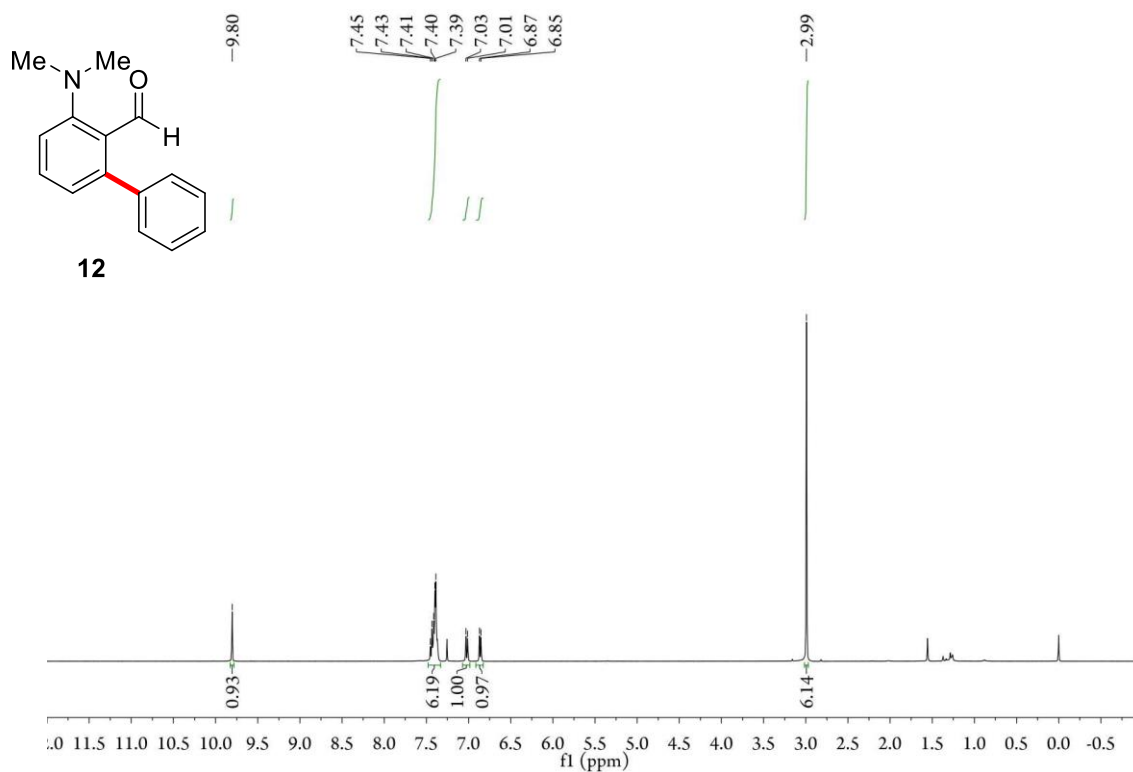

Figure S51. <sup>1</sup>H NMR (400 MHz, CDCl<sub>3</sub>) Spectrum of Compound **12**

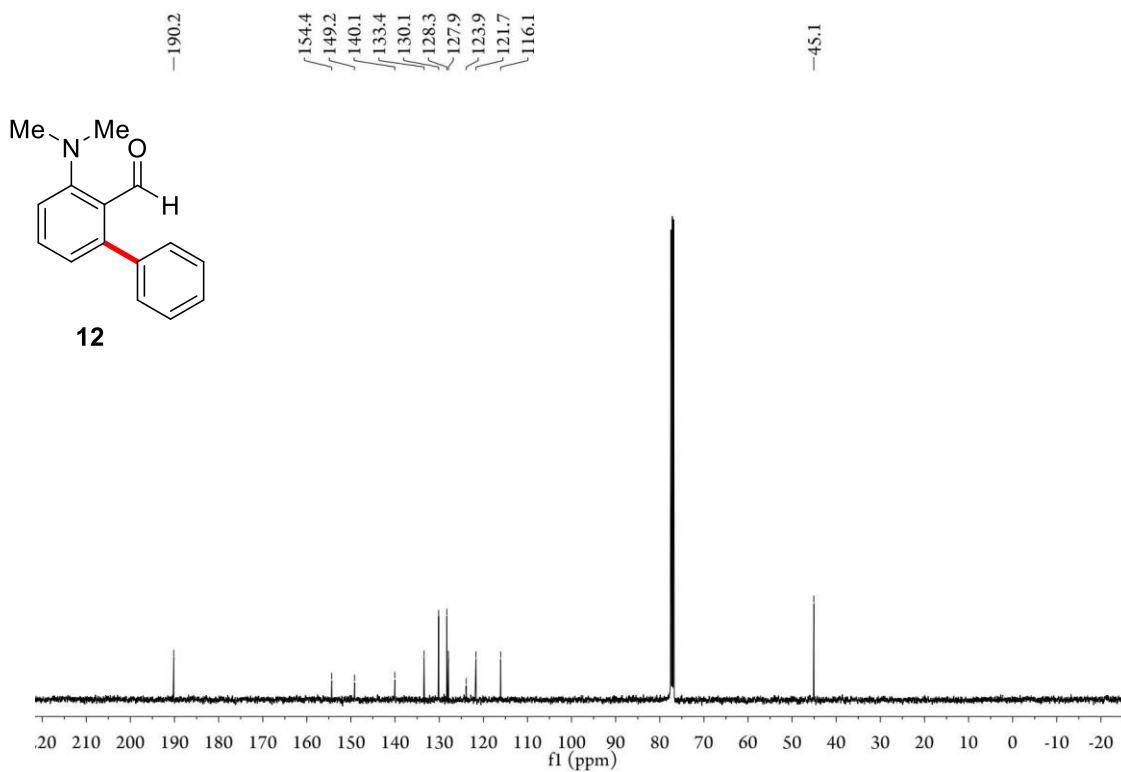

Figure S52. <sup>13</sup>C NMR (100 MHz, CDCl<sub>3</sub>) Spectrum of Compound **12**

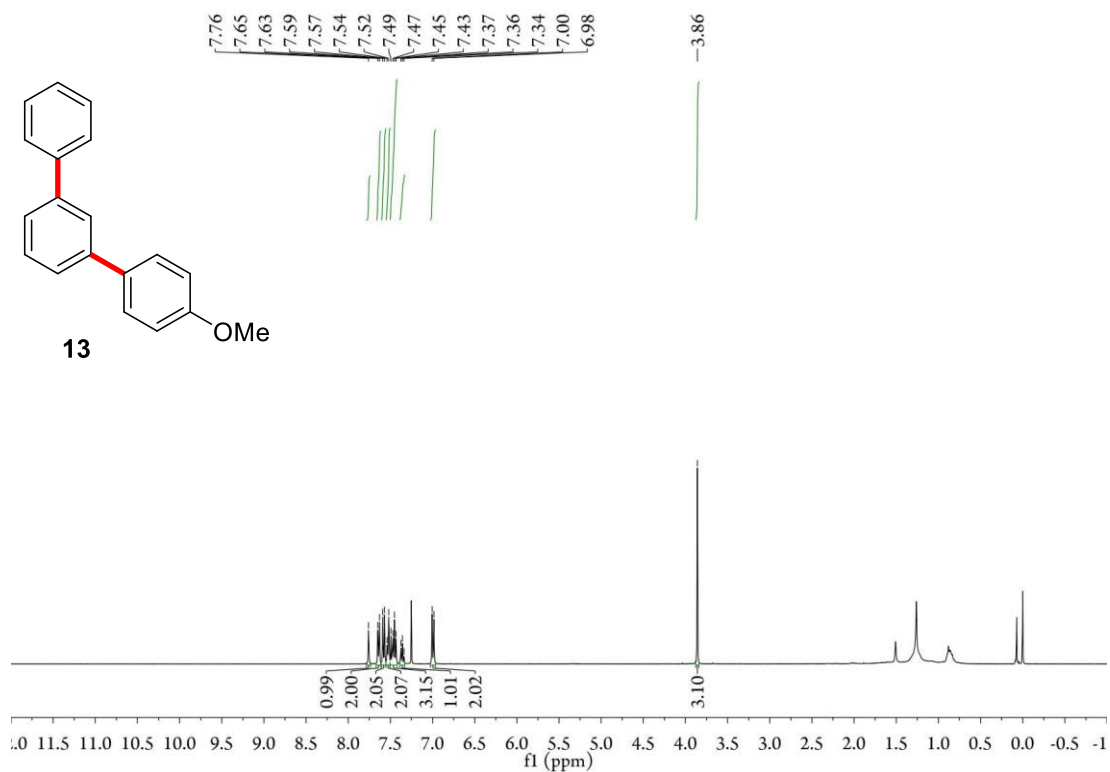

Figure S53. <sup>1</sup>H NMR (400 MHz, CDCl<sub>3</sub>) Spectrum of Compound **13**

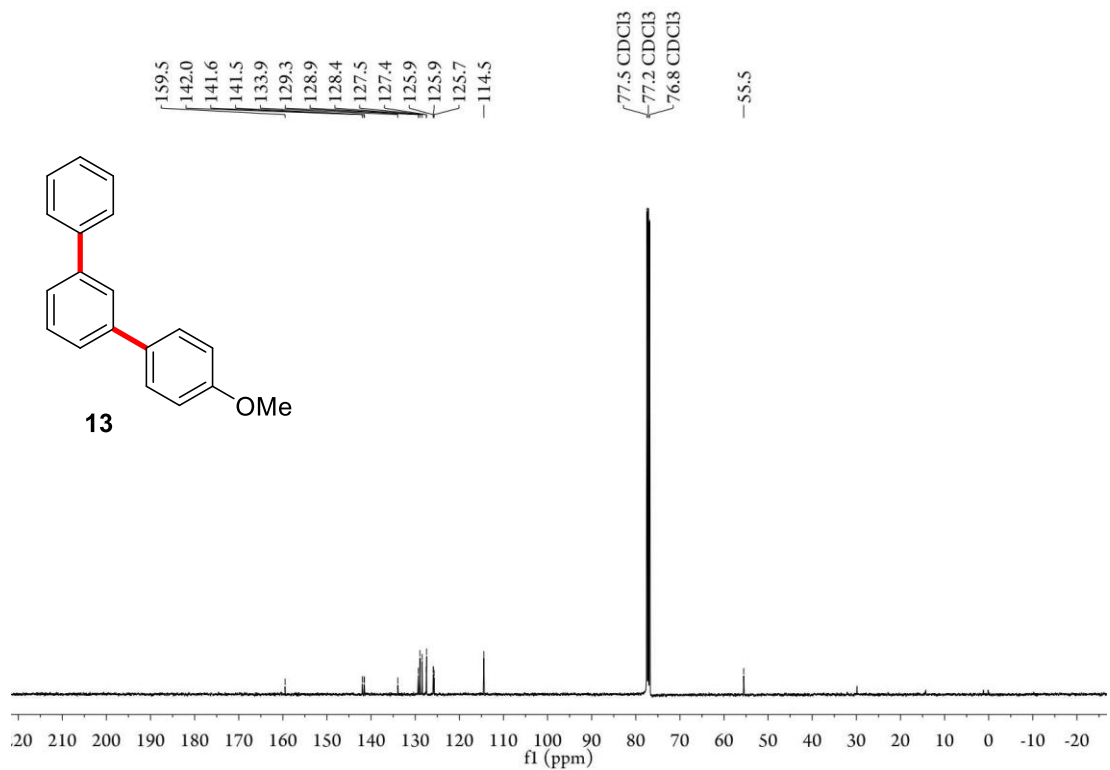

Figure S54. <sup>13</sup>C NMR (100 MHz, CDCl<sub>3</sub>) Spectrum of Compound **13**

## Computational Details

All calculations were carried out with the Gaussian 09 programs.<sup>s1</sup> The geometries of all the species were fully optimized by using density functional theory (DFT)<sup>s2</sup> and the B3LYP method<sup>s3</sup> with the 6-31G(d) basis set for all atoms except for Ru. The Lanl2dz<sup>s4</sup> basis set was used for Ru (BSI). Vibrational frequency calculations carried out at the B3LYP/6-31G (d, p) level of theory were used to characterize all of the stationary points as either minima (the number of imaginary frequencies (NIMAG=0) or transition states (NIMAG=1)). The relative energies were corrected for the vibrational zero-point energies (ZPE, not scaled). The convergence criteria were used as default and the vibrational analysis was also carried out at standard conditions (1 atm., 298.15 K). The solvent effect was taken into account by single-point calculations with integral equation formalism polarizable continuum model (IEFPCM) in DCM at the M06<sup>s6</sup>/6-311++G (d, p) (for Ru, SDD, (BSII) was used). The radii and nonelectrostatic terms were taken from Truhlar and co-workers' universal solvation model (SMD).<sup>s7</sup> Unless stated otherwise, all the relative free energies discussed in the main text are calculated in solution ( $\Delta G_{\text{sol}}$ ), which were obtained by M06/SMD/6-311++G (d, p) //B3LYP/6-31G (d) (Lanl2dz).

(s1) M. J. Frisch, G. W. Trucks, H. B. Schlegel, G. E. Scuseria, M. A. Robb, J. R. Cheeseman, G. Scalmani, V. Barone, B. Mennucci, G. A. Petersson, H. Nakatsuji, M. Caricato, X. Li, H. P. Hratchian, A. F. Izmaylov, J. Bloino, G. Zheng, J. L. Sonnenberg, M. Hada, M. Ehara, K. Toyota, R. Fukuda, J. Hasegawa, M. Ishida, T. Nakajima, Y. Honda, O. Kitao, H. Nakai, T. Vreven, J. A. Montgomery, Jr., J. E. Peralta, F. Ogliaro, M. Bearpark, J. J. Heyd, E. Brothers, K. N. Kudin, V. N. Staroverov, T. Keith, R. Kobayashi, J. Normand, K. Raghavachari, A. Rendell, J. C. Burant, S. S. Iyengar, J. Tomasi, M. Cossi, N. Rega, J. M. Millam, M. Klene, J. E. Knox, J. B. Cross, V. Bakken, C. Adamo, J. Jaramillo, R. Gomperts, R. E. Stratmann, O. Yazyev, A. J. Austin, R.

Cammi, C. Pomelli, J. W. Ochterski, R. L. Martin, K. Morokuma, V. G. Zakrzewski, G. A. Voth, P. Salvador, J. J. Dannenberg, S. Dapprich, A. D. Daniels, O. Farkas, J. B. Foresman, J. V. Ortiz, J. Cioslowski, and D. J. Fox, Gaussian 09, D.01, Gaussian, Inc., Wallingford CT, **2013**.

(s2) Parr, R. G.; Yang, W. *Density-functional Theory of Atoms and Molecules*; Oxford University Press: New York, **1989**.

(s3) (a) A. D. Becke, *J. Chem. Phys.* **1993**, *98*, 5648–5652; (b) C. Lee, W. Yang, R. G. Parr *Phys. Rev. B* **1988**, *37*, 785–789.

(s4) (a) W. R. Wadt and P. J. Hay, *J. Chem. Phys.*, **1985**, *82*, 284-298; (b) P. J. Hay and W. R. Wadt, *J. Chem. Phys.*, **1985**, *82*, 299-310.

(s5) W. Ehlers, M. Böhme, S. Dapprich, A. Gobbi, A. Höllwarth, V. Jonas, K. F. Köhler, R. Stegmann, A. Veldkamp and G. Frenking *Chem. Phys. Lett.*, **1993**, *208*, 111-114.

(s6) (a) Y. Zhao, N. E. Schultz, D. G. Truhlar, *J. Chem. Theory. Comput.* **2006**, *2*, 364-382; (b) Y. Zhao, D. G. Truhlar, *J. Phys. Chem. A.* **2006**, *110*, 13126-13130.

(s7) (a) Y. Zhao, D. G. Truhlar, *J. Phys. Chem. Lett.* **2008**, *112*, 1095-1099; (b) D. Jacquemin, E. A. Perpète, I. Ciofini, C. Adamo, R. Valero, Y. Zhao, D. Truhlar, *J. Chem. Theory Comput.* **2010**, *6*, 2071-2085.

**The Cartesian coordinates of the stationary points****INT1**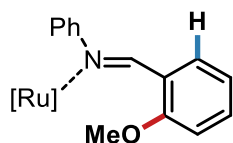

Ru, 0, -0.7895948398, 1.3544688511, 0.1646845044  
 C, 0, -2.2540098911, 1.6871793462, -1.0723422038  
 O, 0, -3.2405760765, 1.9124058534, -1.6330897057  
 C, 0, -0.4734774811, 3.204732839, 0.2833793519  
 O, 0, -0.2327970184, 4.3363113809, 0.3300413411  
 C, 0, -0.3579268332, 1.1581094259, 2.0317837066  
 O, 0, -0.3006259317, 1.0564438202, 3.1861384512  
 C, 0, -3.2570153283, -0.9916000331, 0.8180214683  
 C, 0, -2.2827684124, -1.45632721, -0.074934248  
 C, 0, -2.5957129272, -2.4788167448, -0.9820372541  
 C, 0, -3.8702236281, -3.0458216231, -0.9779525198  
 C, 0, -4.8335751731, -2.6019430401, -0.0714732235  
 C, 0, -4.5220074794, -1.5749980896, 0.8236222482  
 C, 0, 3.7166909752, -1.7370092274, 0.6224807036  
 C, 0, 4.1736283494, -0.6830656131, -0.1623560785  
 C, 0, 3.2957332858, 0.0497822128, -0.9598591302  
 C, 0, 1.9417248073, -0.2712560025, -0.9552490634  
 C, 0, 1.4399417869, -1.3070882829, -0.1536950497  
 C, 0, 2.3623160007, -2.0504668043, 0.6070286152  
 C, 0, 0.0244175146, -1.6817572678, -0.0996094762  
 H, 0, -0.1737773283, -2.7555214837, -0.0353068362  
 N, 0, -0.9765416858, -0.8657231781, -0.059925549  
 F, 0, 1.143462653, 0.4071933625, -1.7917775005  
 F, 0, 3.7496041307, 1.0350756533, -1.7376923808  
 F, 0, 5.4701716988, -0.3594875545, -0.1812292512  
 H, 0, -3.0092515181, -0.1814611246, 1.4950772047

H, 0, -1.8588153311, -2.7956608479, -1.7138209662  
 H, 0, -4.111064474, -3.8257539529, -1.6940841216  
 H, 0, -5.8260574725, -3.042103164, -0.0721375909  
 H, 0, -5.2694696474, -1.2187336891, 1.5258450002  
 H, 0, 1.9965697651, -2.8709387457, 1.2162189733  
 H, 0, 4.4264049401, -2.2926600961, 1.2242012008

**TS<sup>C-OMe</sup>**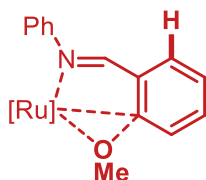

Ru, 0, -0.53716239, -1.2422471094, -0.0965265062  
 C, 0, 0.3135884418, -2.9615165177, -0.1792284623  
 O, 0, 0.839968584, -4.0140834832, -0.2149961044  
 C, 0, -0.7815561697, -1.4202364416, 1.7880023594  
 O, 0, -0.8878767097, -1.4980458582, 2.9576530934  
 C, 0, -2.3346339993, -1.9542041942, -0.6637580553  
 O, 0, -3.3510981713, -2.3842522088, -1.0583836288  
 C, 0, -3.0387056259, 2.2204215009, -0.8197087613  
 C, 0, -2.5900725071, 1.225621617, 0.082821213  
 C, 0, -3.5103657234, 0.6675394958, 0.9989608635  
 C, 0, -4.8453401808, 1.1035296643, 1.0194635016  
 C, 0, -5.286135486, 2.1013076476, 0.1273294405  
 C, 0, -4.3750770565, 2.6563358463, -0.7912956621  
 C, 0, 3.5131019347, 1.6192701026, -0.2285281652  
 C, 0, 3.6953399728, 0.1996858444, -0.2907145835  
 C, 0, 2.6264668355, -0.6866650716, -0.3480776912  
 C, 0, 1.2670397171, -0.1865013859, -0.3789435652  
 C, 0, 1.0968335887, 1.2522606452, -0.1763879563  
 C, 0, 2.2223636762, 2.1273938565, -0.1585947472  
 C, 0, -0.2362679565, 1.6885091181, -0.0472978571

H, 0, -0.4804136959, 2.7514371182, -0.0155566908  
 N, 0, -1.2254614749, 0.7874426534, 0.0635349786  
 H, 0, -2.3502039198, 2.6235574748, -1.5581499754  
 H, 0, -3.1765743724, -0.085959346, 1.7058046428  
 H, 0, -5.5386416934, 0.6689892688, 1.7355933778  
 H, 0, -6.3206272837, 2.4342525975, 0.1444811405  
 H, 0, -4.7057852299, 3.4167156608, -1.4949897492  
 H, 0, 2.8247332396, -1.7550668908, -0.3332603142  
 H, 0, 4.7074264364, -0.2019133371, -0.2590305791  
 H, 0, 4.3770742167, 2.2766002253, -0.1975775922  
 H, 0, 2.0544596803, 3.2001040966, -0.0666145154  
 O, 0, 0.3893014126, -0.5352529596, -1.8065972077  
 C, 0, 0.9662032286, -1.3359852697, -2.8801762803  
 H, 0, 1.2688789023, -0.6484758293, -3.6776239588  
 H, 0, 1.8472251257, -1.8938998948, -2.5357900506  
 H, 0, 0.208220583, -2.0344290361, -3.2559631412

**INT<sup>C-OMe</sup>**

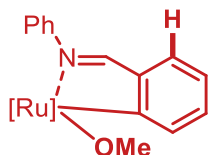

Ru, 0, 0.279346276, -1.0339187306, 0.102930283  
 C, 0, 1.5928564335, -2.3988502584, -0.1126465474  
 O, 0, 2.4164412217, -3.1914654494, -0.2421060431  
 C, 0, 0.2150361473, -1.2634094232, 2.0264046418  
 O, 0, 0.2033575252, -1.3702522875, 3.1731358063  
 C, 0, -1.264615163, -2.2621629321, -0.4219611555  
 O, 0, -2.0998502479, -2.9247076353, -0.8330035477  
 C, 0, -2.9718570958, 1.544561334, -0.9838975022  
 C, 0, -2.3785559502, 0.8331137928, 0.0683775294  
 C, 0, -3.1851530289, 0.1578513294, 0.9947933412  
 C, 0, -4.5725341028, 0.221140546, 0.8842885899

C, 0, -5.1659579095, 0.9405095802, -0.1566564896  
 C, 0, -4.3618471019, 1.5964093806, -1.0898901518  
 C, 0, 3.3667587844, 2.7945403791, 0.3247242698  
 C, 0, 3.930582818, 1.5186787574, 0.4213821753  
 C, 0, 3.1280187543, 0.3707375772, 0.4028011129  
 C, 0, 1.7373083802, 0.4583816902, 0.2863039555  
 C, 0, 1.1838898178, 1.7637353422, 0.2009336823  
 C, 0, 1.9861688058, 2.9178296284, 0.2161476996  
 C, 0, -0.2528150919, 1.8497099294, 0.1251499496  
 H, 0, -0.7462605525, 2.8210976964, 0.0367994142  
 N, 0, -0.9654972054, 0.7696172669, 0.1964277199  
 H, 0, -2.3407680348, 2.0161639427, -1.7301067617  
 H, 0, -2.7184379639, -0.3929689684, 1.8053122548  
 H, 0, -5.1916449691, -0.2935730421, 1.613081637  
 H, 0, -6.2473939073, 0.9797562171, -0.2447197623  
 H, 0, -4.8149415565, 2.1406845206, -1.9132845888  
 H, 0, 3.6145495614, -0.5979891961, 0.4769520214  
 H, 0, 5.0090226113, 1.4143336326, 0.5111100885  
 H, 0, 3.9987155909, 3.6771473677, 0.3383872668  
 H, 0, 1.5251897147, 3.900247358, 0.1432086406  
 O, 0, 0.2125636546, -0.5601346354, -1.9158345387  
 C, 0, 1.2768639249, -0.8387510871, -2.7742530123  
 H, 0, 2.2366882012, -0.400406975, -2.4456766936  
 H, 0, 1.4505563959, -1.9216231976, -2.9308017325  
 H, 0, 1.050244212, -0.4116729807, -3.7646345526

**TS<sup>C-H</sup>**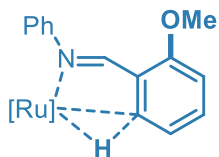

Ru, 0, -0.4006658941, -1.2620896835, -0.0738159147  
 C, 0, 0.4528042682, -2.9533595229, -0.2892182433



O, 0, 1.0095267139, -3.953497602, -0.4329511721  
C, 0, -0.714519437, -1.5293600078, 1.8526039426  
O, 0, -0.8695783734, -1.6863826303, 2.9840733788  
C, 0, -2.0693703186, -1.8979298018, -0.9430398022  
O, 0, -3.0161612205, -2.246844391, -1.4957499646  
C, 0, -2.8413818201, 2.2671569977, -0.8971399271  
C, 0, -2.4398951448, 1.2482171336, -0.0196085613  
C, 0, -3.3836849159, 0.6708922849, 0.8408277542  
C, 0, -4.7020083385, 1.1226120925, 0.8354576306  
C, 0, -5.0987259236, 2.1429479661, -0.032059842  
C, 0, -4.1636491207, 2.7105529608, -0.8985979317  
C, 0, 3.6198587574, 1.6551217785, -0.0354933869  
C, 0, 3.8182180999, 0.270454486, -0.1931706985  
C, 0, 2.7620533039, -0.6208051807, -0.297535818  
C, 0, 1.4269539435, -0.1618401484, -0.2193895126  
C, 0, 1.223287216, 1.2441640841, -0.0608739007  
C, 0, 2.3214497208, 2.1447894229, 0.024450726  
C, 0, -0.1270098886, 1.6828623876, 0.0102322341  
H, 0, -0.3676772683, 2.7417363143, 0.0823523677  
N, 0, -1.0896590471, 0.7927198834, -0.0108954775  
H, 0, -2.1226478707, 2.684796741, -1.5953813695  
H, 0, -3.0748203924, -0.115880667, 1.5195978691  
H, 0, -5.4215980014, 0.6741103273, 1.5140760036  
H, 0, -6.1288058034, 2.48604924, -0.0378552449  
H, 0, -4.4637293265, 3.4934595426, -1.589087767  
H, 0, 0.5923076117, -0.6660166514, -1.3266260751  
H, 0, 2.9674754989, -1.6771147533, -0.4374940178  
H, 0, 4.8379513951, -0.1043690933, -0.2340077764  
H, 0, 4.4745915998, 2.3161845959, 0.0305010918  
O, 0, 1.9949245124, 3.4597979663, 0.169680692  
C, 0, 3.0467745185, 4.4104615864, 0.270411913

H, 0, 2.563741262, 5.382038139, 0.3825013133  
 H, 0, 3.6795930695, 4.2164206032, 1.144966492  
 H, 0, 3.6698454942, 4.4161973396, -0.6322572051

**INT<sup>C-H</sup>**

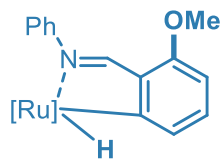

Ru, 0, -0.2311414093, -1.3564019796, -0.2795750437  
 C, 0, 0.3985128093, -3.0780354728, -0.7798989153  
 O, 0, 0.8267425381, -4.0901904756, -1.1261796765  
 C, 0, -0.2631876609, -1.6860831791, 1.7022285558  
 O, 0, -0.2271695986, -1.8795942177, 2.833526823  
 C, 0, -2.114800956, -1.7781921597, -0.7471423091  
 O, 0, -3.1808597783, -2.0054917657, -1.1087500648  
 C, 0, -2.0484287233, 2.5624132298, -0.9156970402  
 C, 0, -1.8267451101, 1.4758747239, -0.0564566884  
 C, 0, -2.8550856876, 1.0496083876, 0.7953020992  
 C, 0, -4.07791926, 1.7175272881, 0.8027413044  
 C, 0, -4.2949300295, 2.8055574998, -0.0463490413  
 C, 0, -3.2773212267, 3.2222134201, -0.9057658814  
 C, 0, 4.2151529877, 0.8221326598, -0.0110892635  
 C, 0, 4.1769638253, -0.5728038725, -0.1188782455  
 C, 0, 2.9736417103, -1.276770523, -0.1931541041  
 C, 0, 1.7461622831, -0.6031920273, -0.1641141829  
 C, 0, 1.7854392963, 0.8128021316, -0.0499252714  
 C, 0, 3.0115688169, 1.5241419926, 0.0255804936  
 C, 0, 0.523986853, 1.4906789113, -0.0055281345  
 H, 0, 0.4788725731, 2.5759047055, 0.0797032427  
 N, 0, -0.5773477791, 0.7957214829, -0.0480942773  
 H, 0, -1.2681231194, 2.8641620757, -1.6074648729  
 H, 0, -2.681673846, 0.2082796353, 1.4579553965

H, 0, -4.8640754884, 1.385444189, 1.4744171001  
H, 0, -5.2524166283, 3.3174466365, -0.0443517571  
H, 0, -3.4413876372, 4.0564649632, -1.5816649289  
H, 0, -0.0368111874, -0.9985009517, -1.8669543239  
H, 0, 3.0096645863, -2.3584899533, -0.2784936565  
H, 0, 5.1178594807, -1.1175334475, -0.145486432  
H, 0, 5.1674626208, 1.3346255177, 0.0440066907  
O, 0, 2.9140379828, 2.8805782574, 0.1321220477  
C, 0, 4.1113718498, 3.6416061621, 0.2154051341  
H, 0, 3.7998222817, 4.6841147696, 0.2940173722  
H, 0, 4.6983431782, 3.3707960551, 1.1015340587  
H, 0, 4.7308880827, 3.5145247008, -0.6807171373
